# Supplementary material (part 3 of 3)
Source: publisher figshare collection journal article supplement (https://springernature.figshare.com/ndownloader/files/18969356)

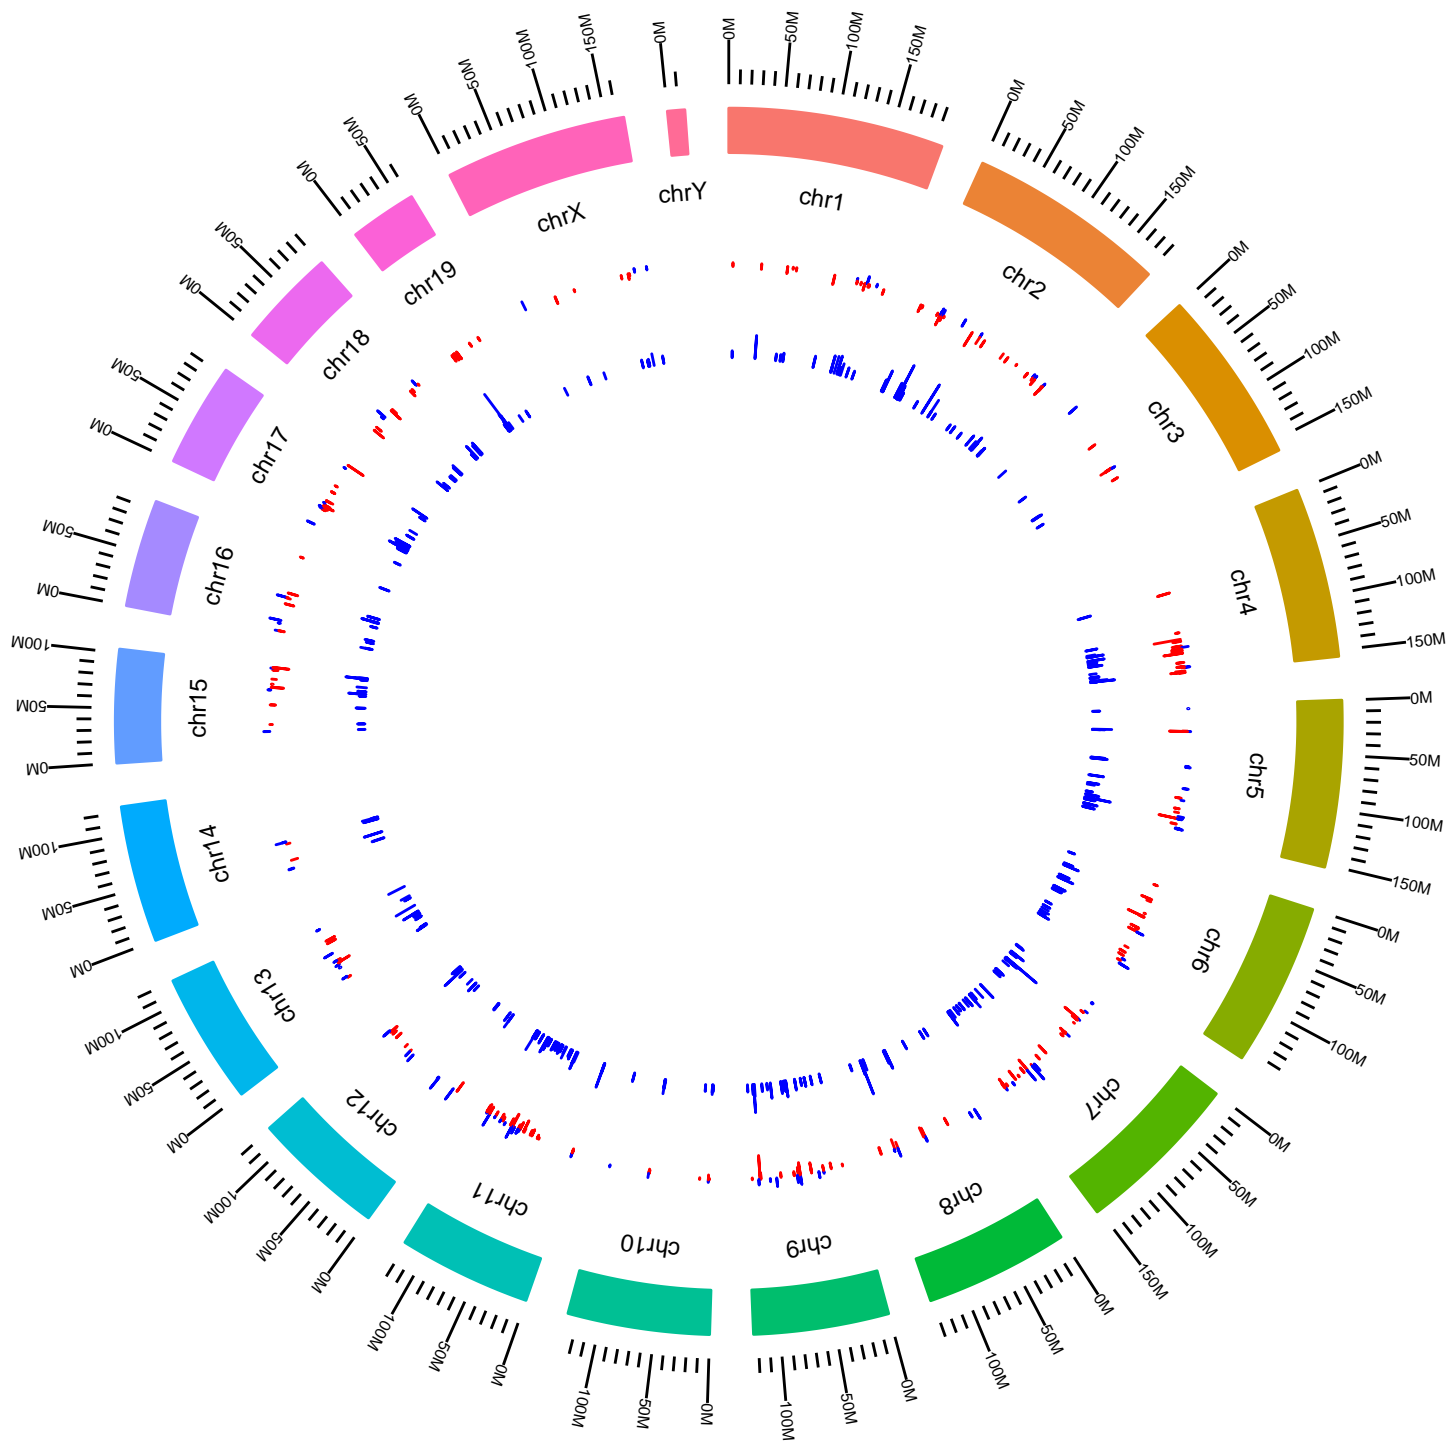

Supplement: Supplementary file 201 [file 18969356]

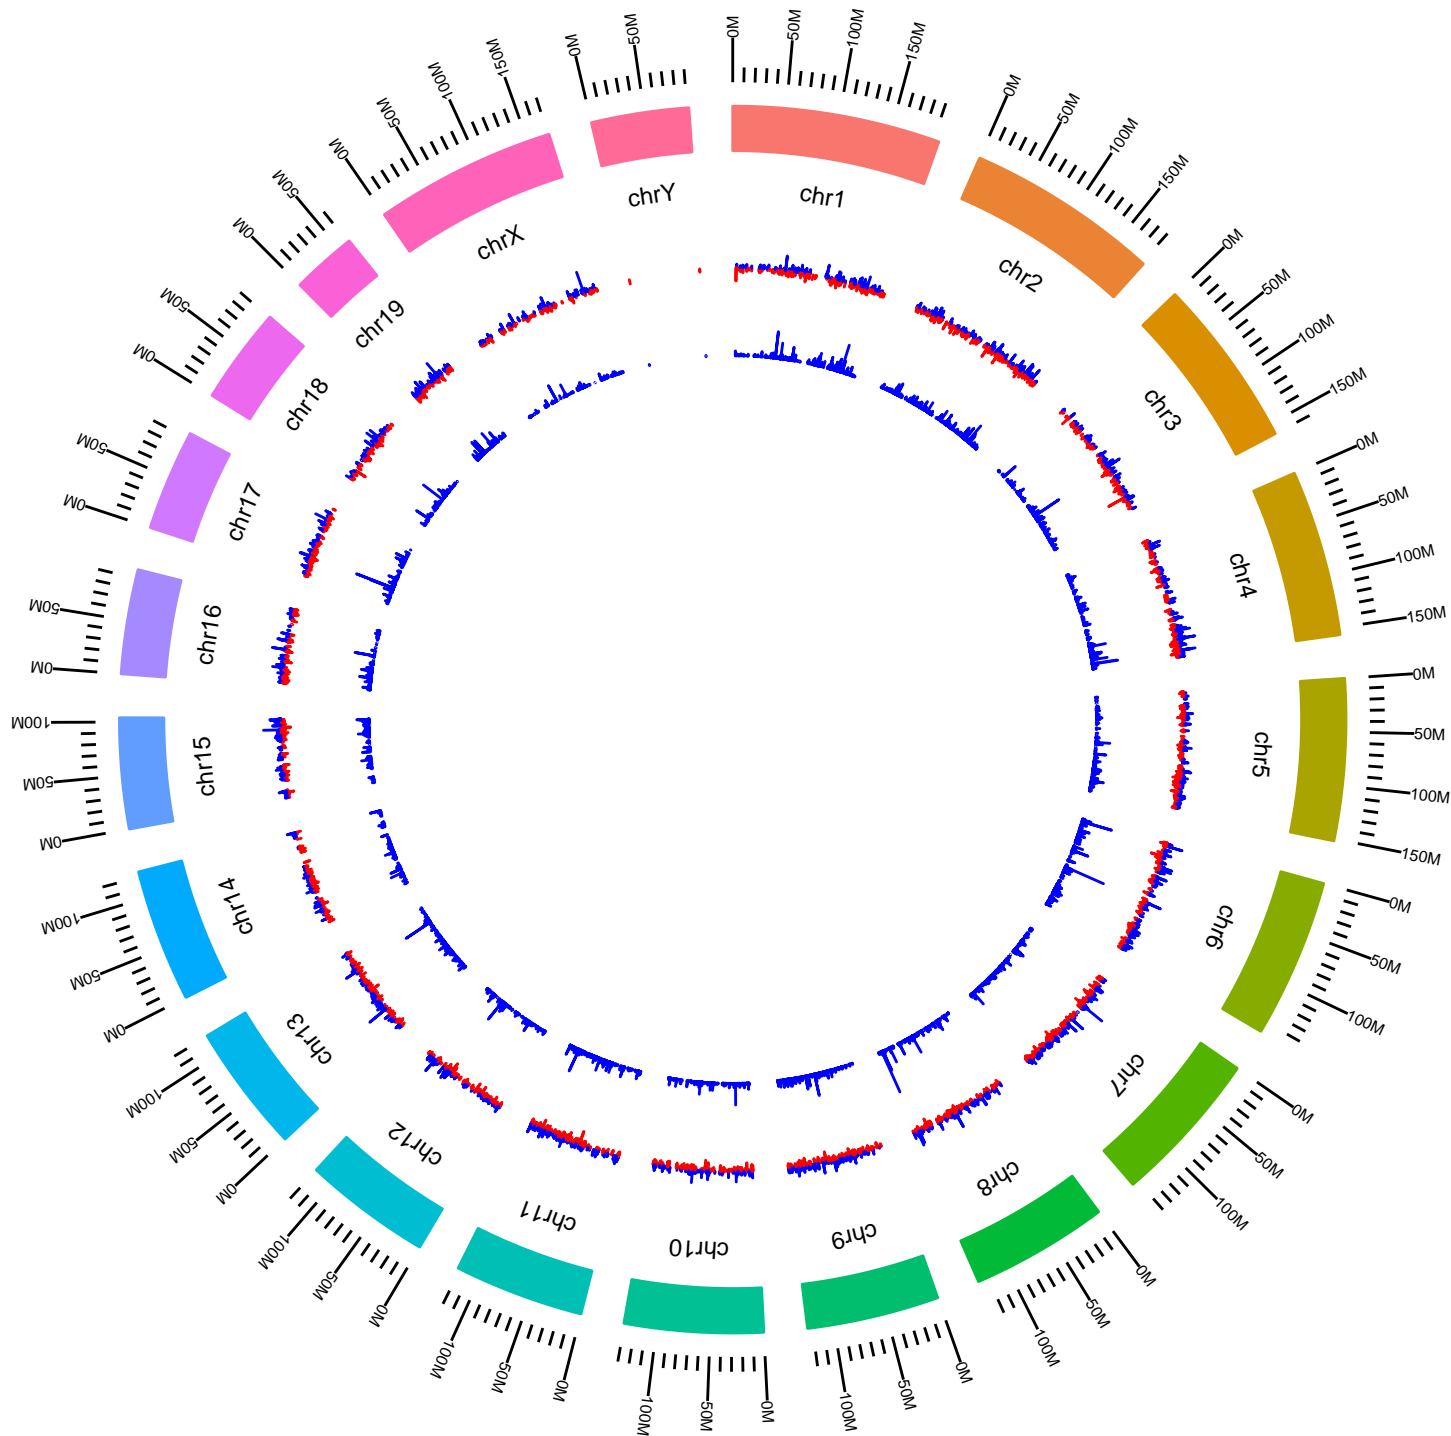

Supplement: Supplementary file 202 [file 18969356]

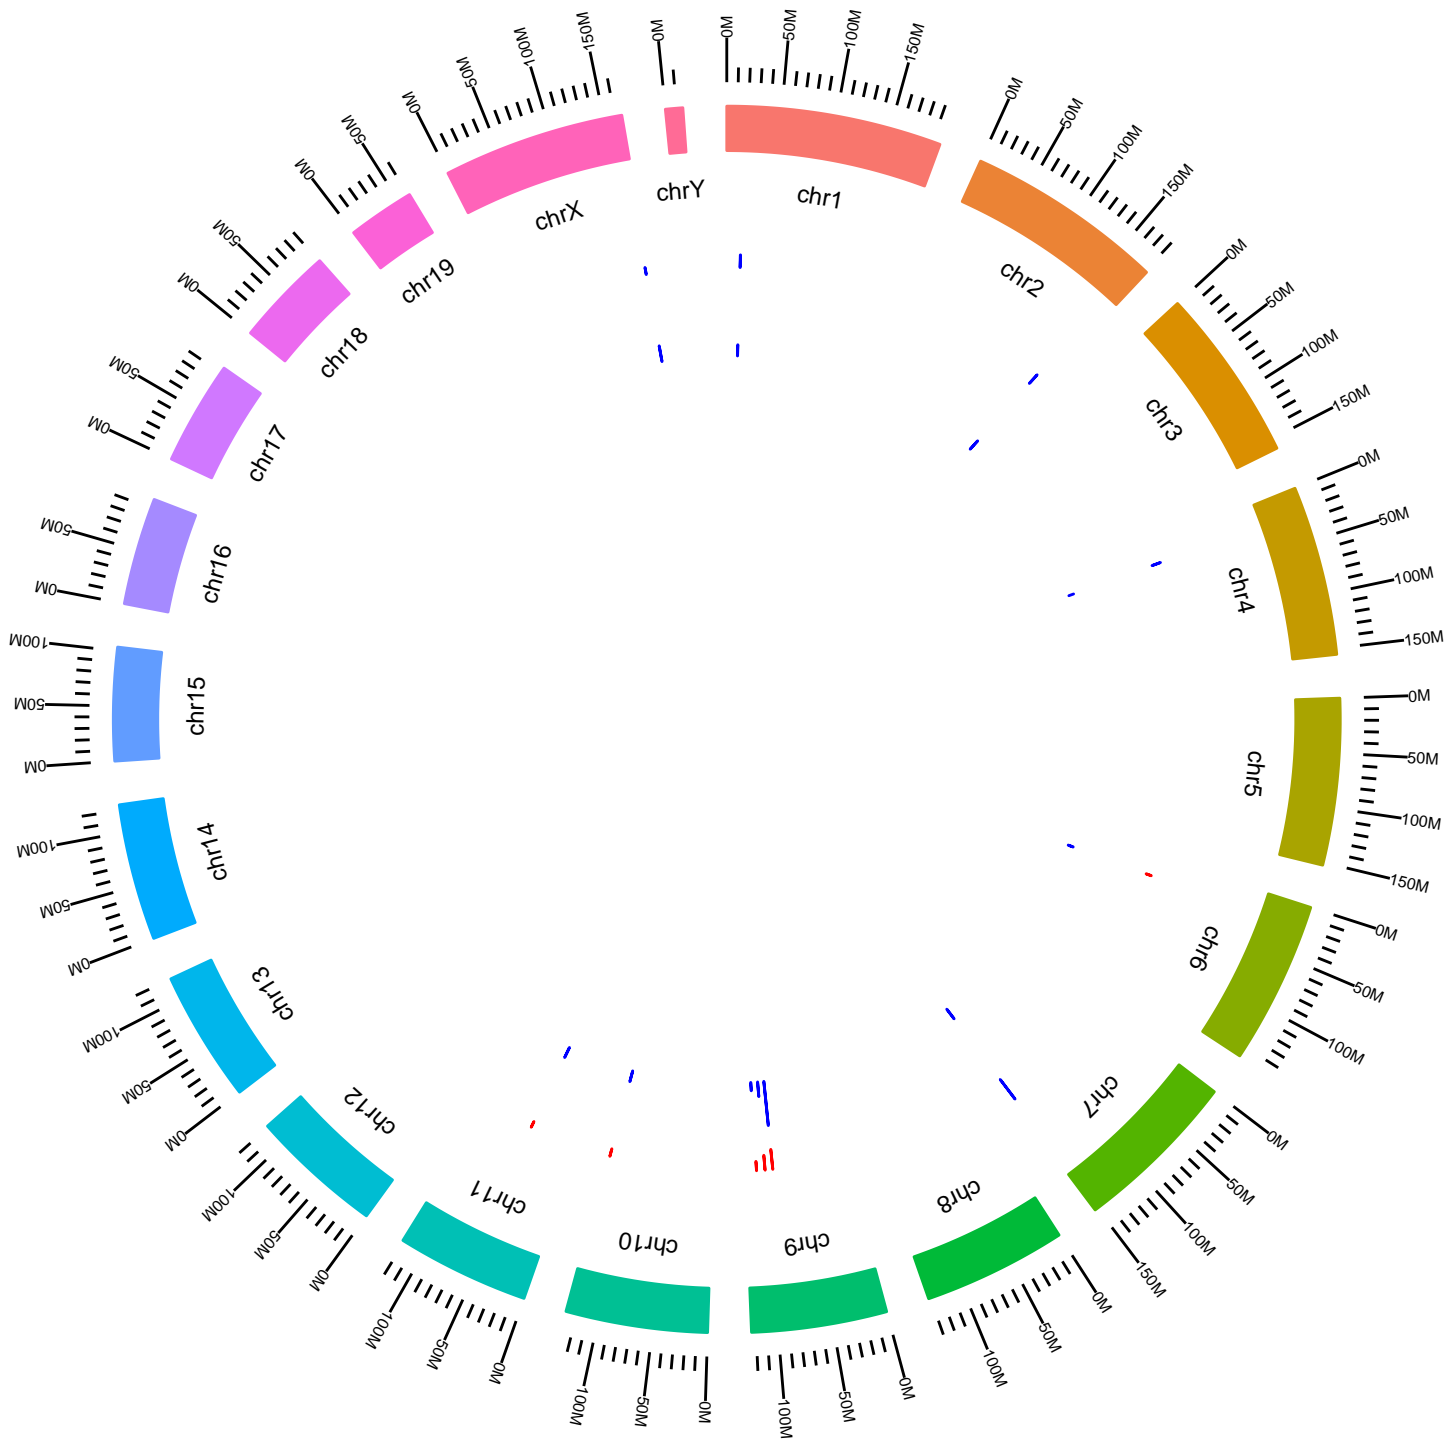

Supplement: Supplementary file 203 [file 18969356]

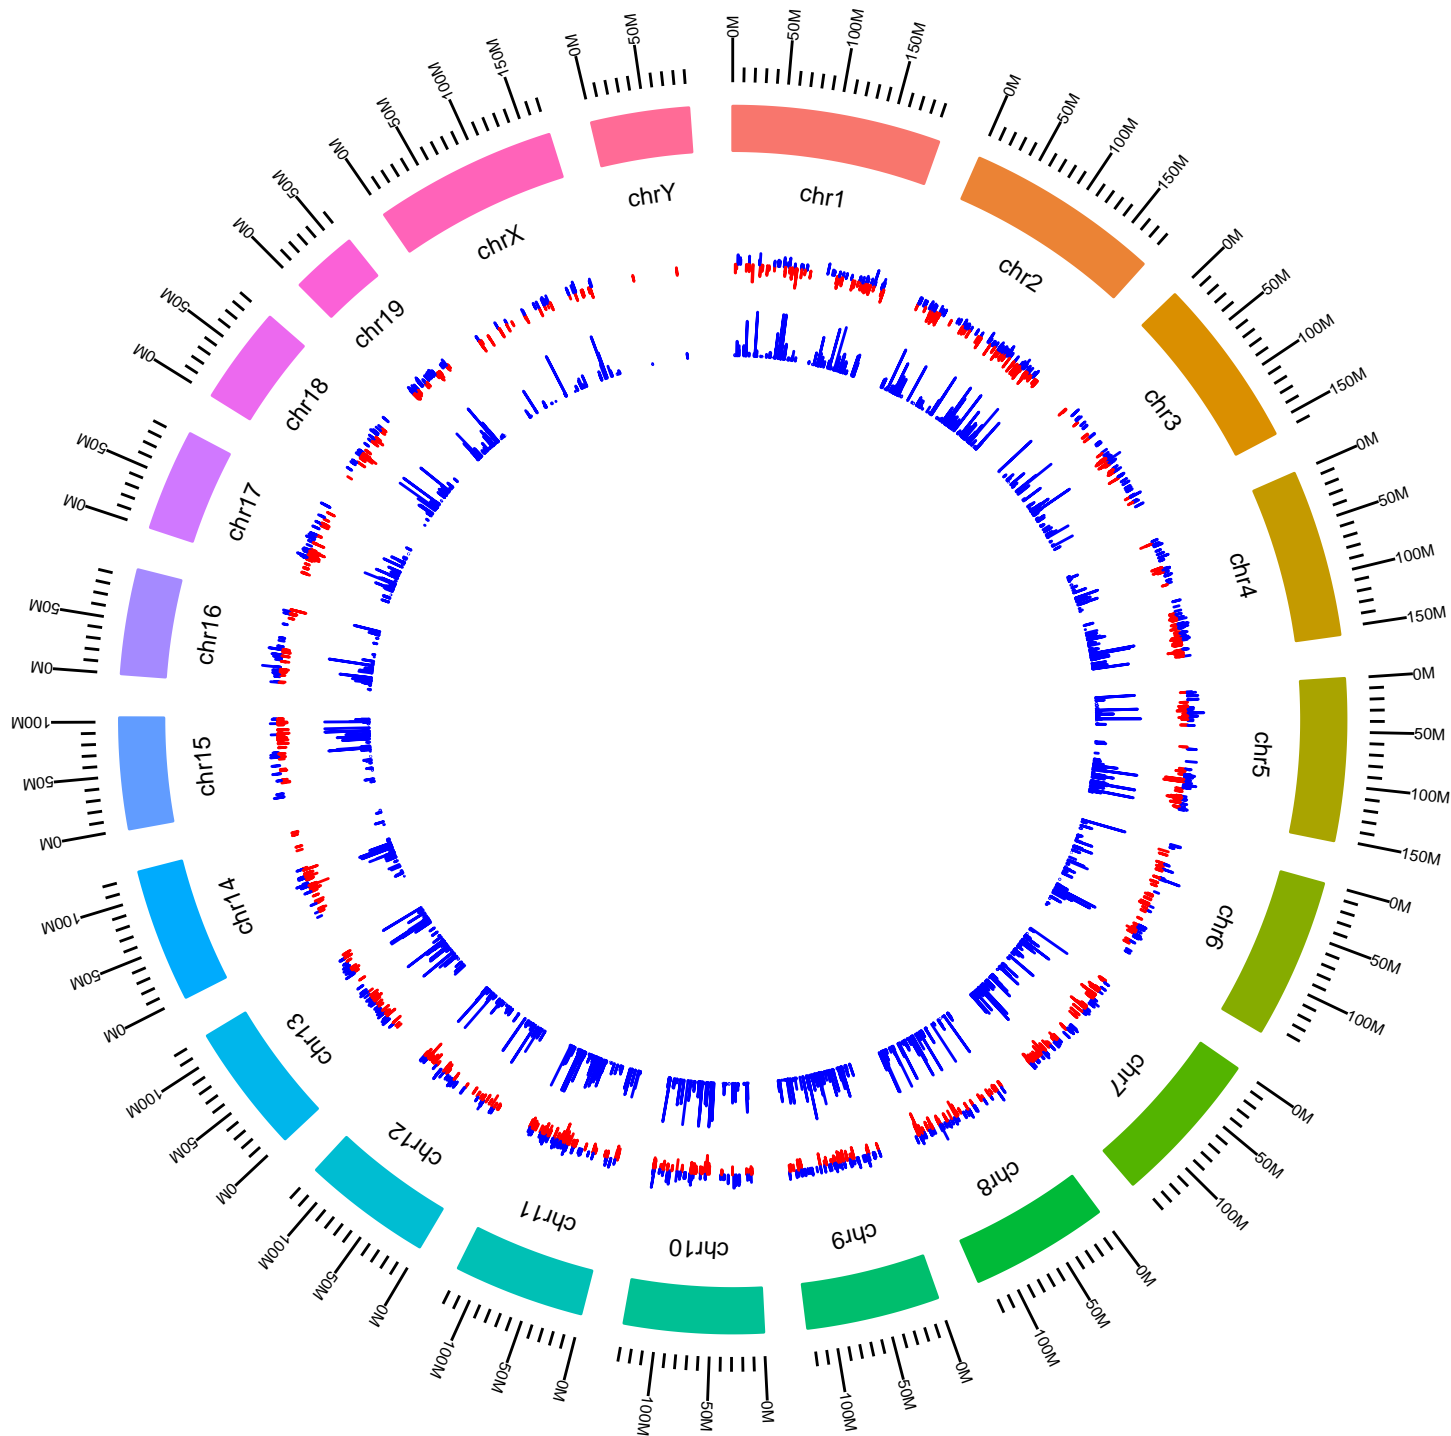

Supplement: Supplementary file 204 [file 18969356]

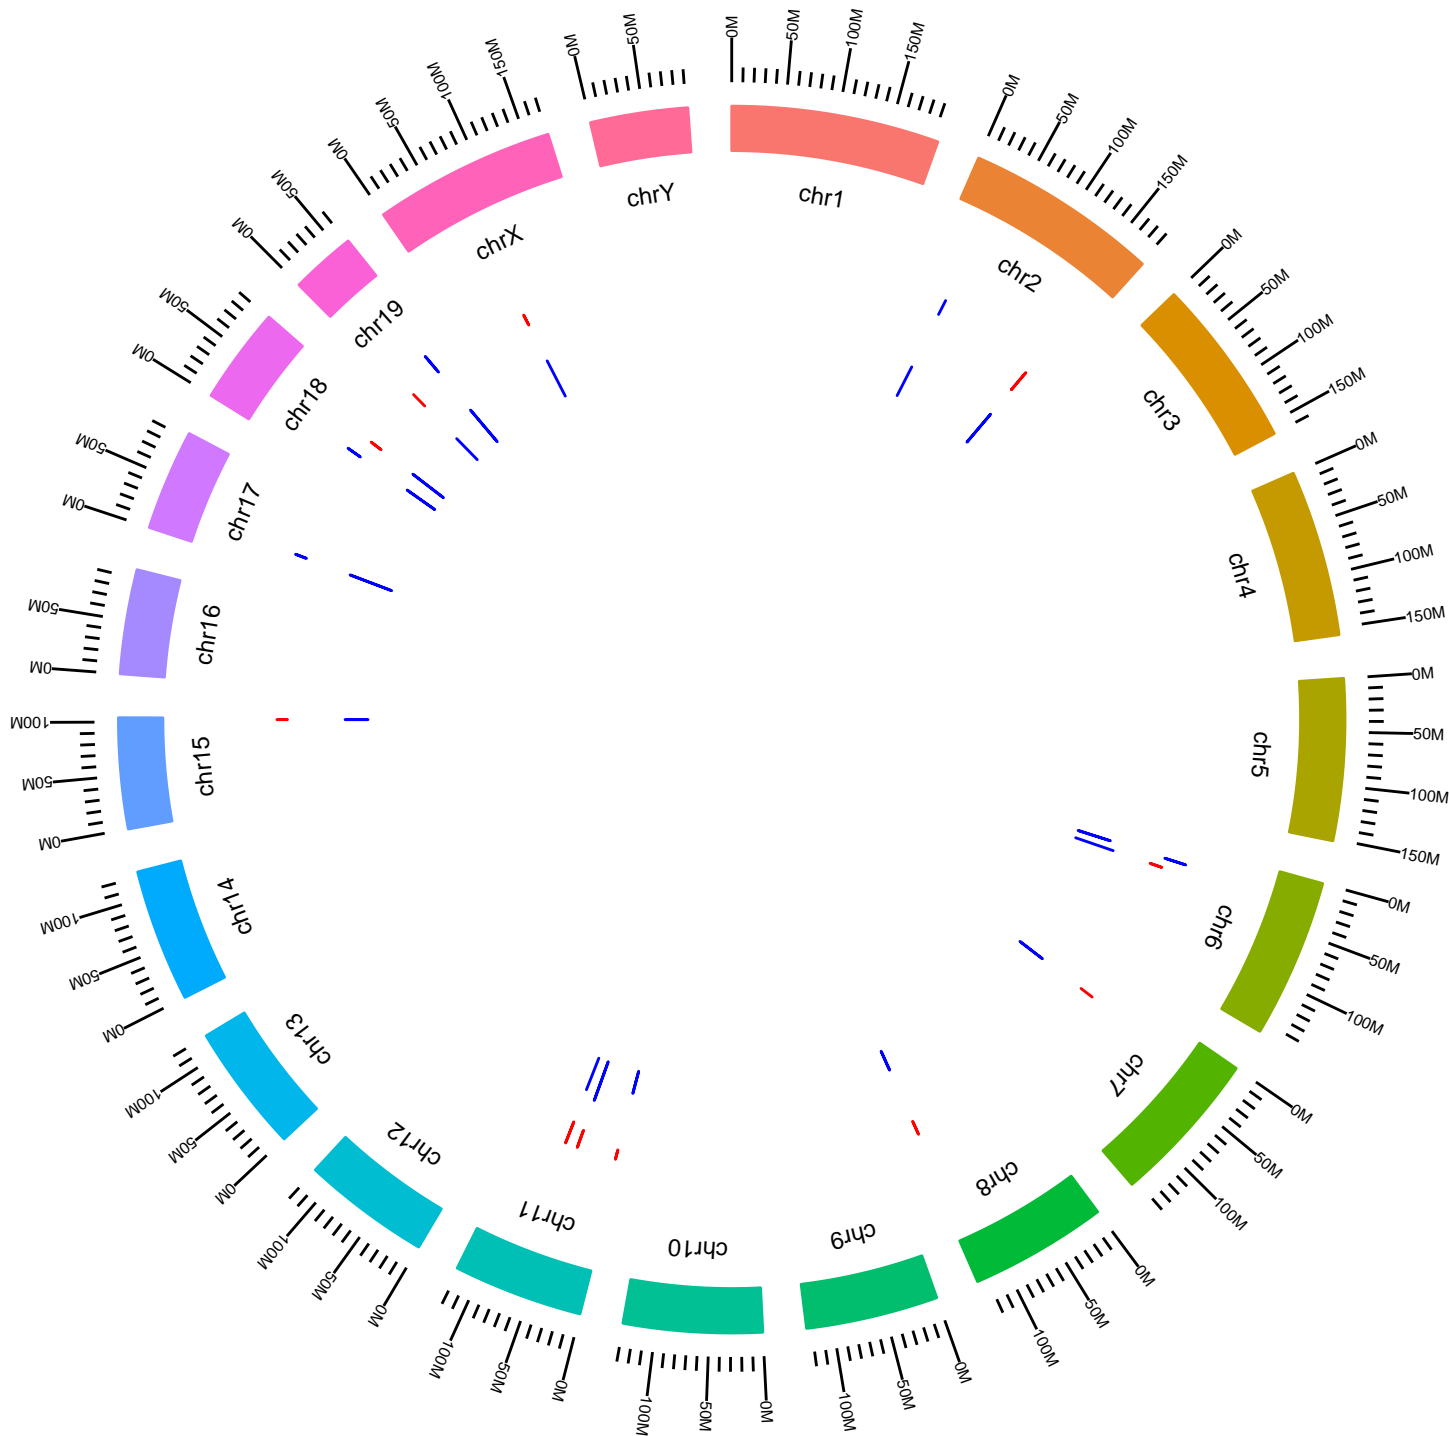

Supplement: Supplementary file 205 [file 18969356]

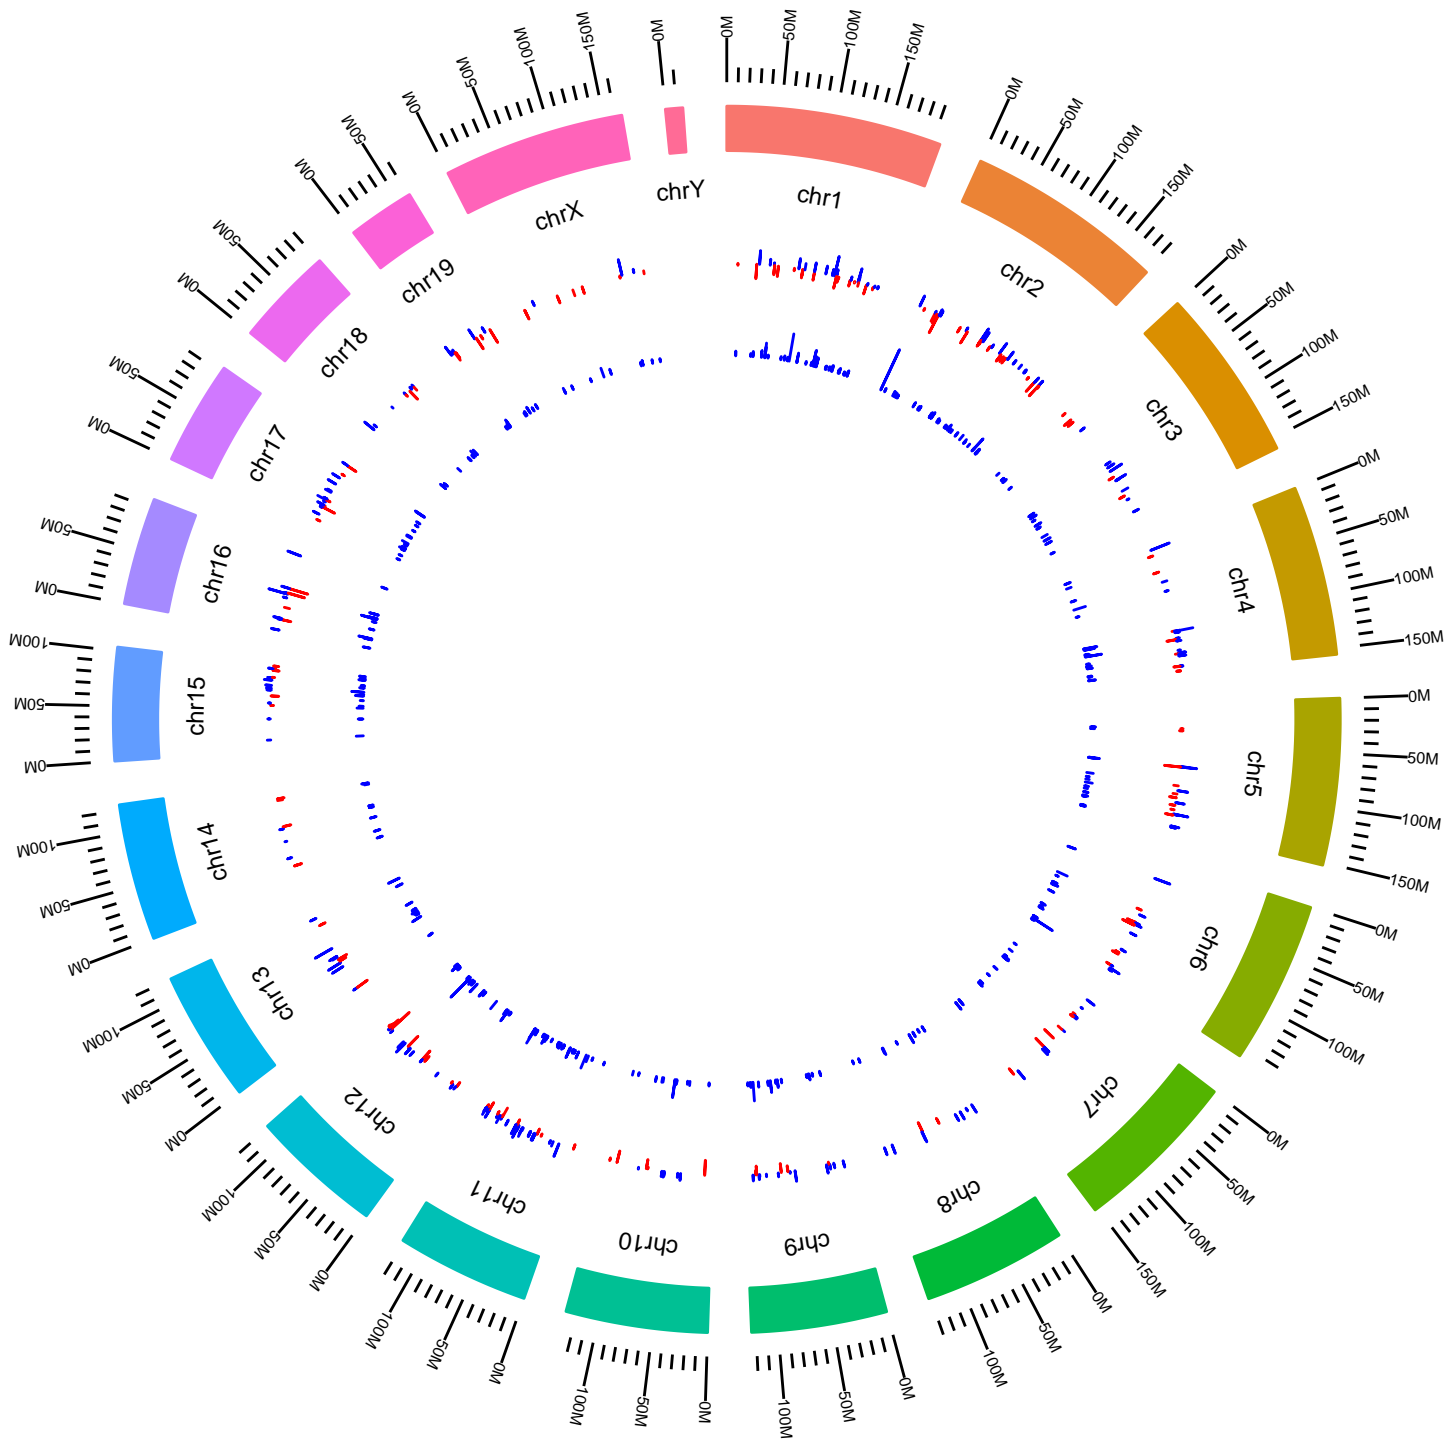

Supplement: Supplementary file 206 [file 18969356]

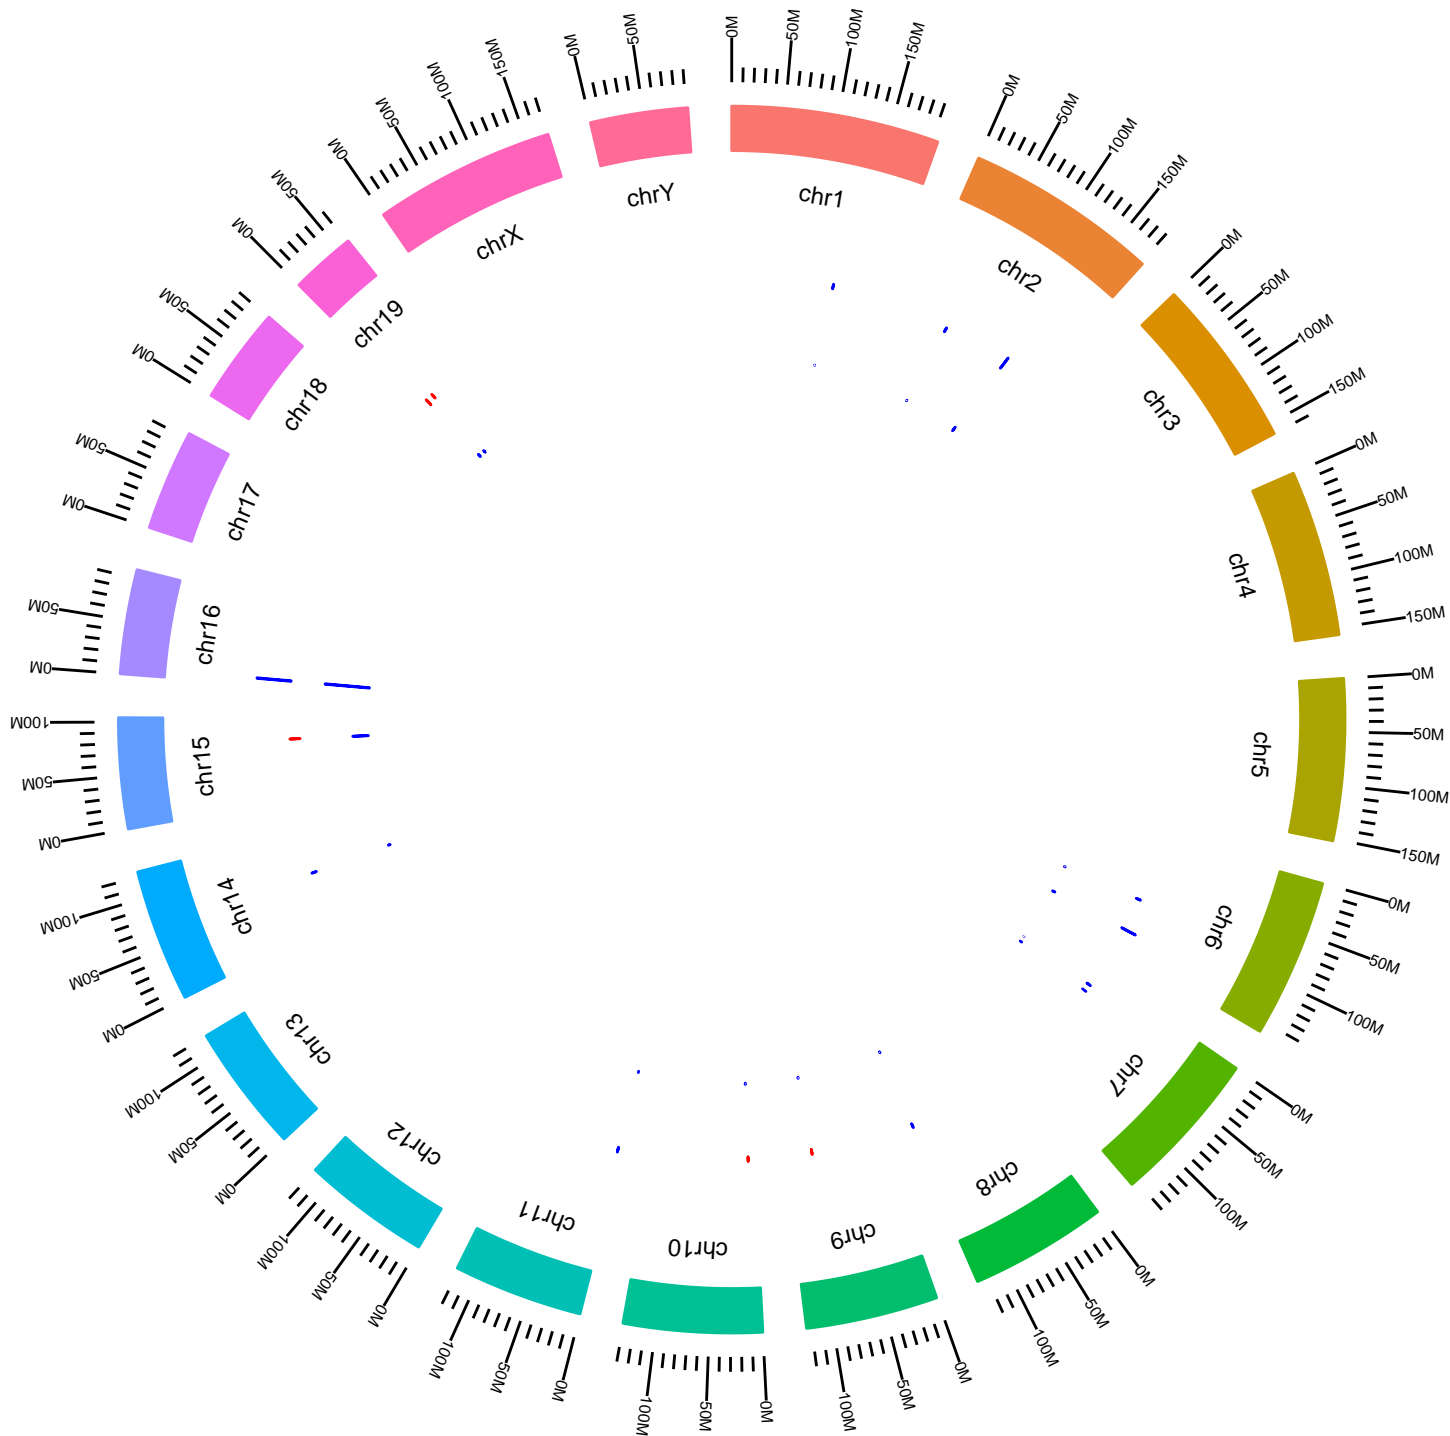

Supplement: Supplementary file 207 [file 18969356]

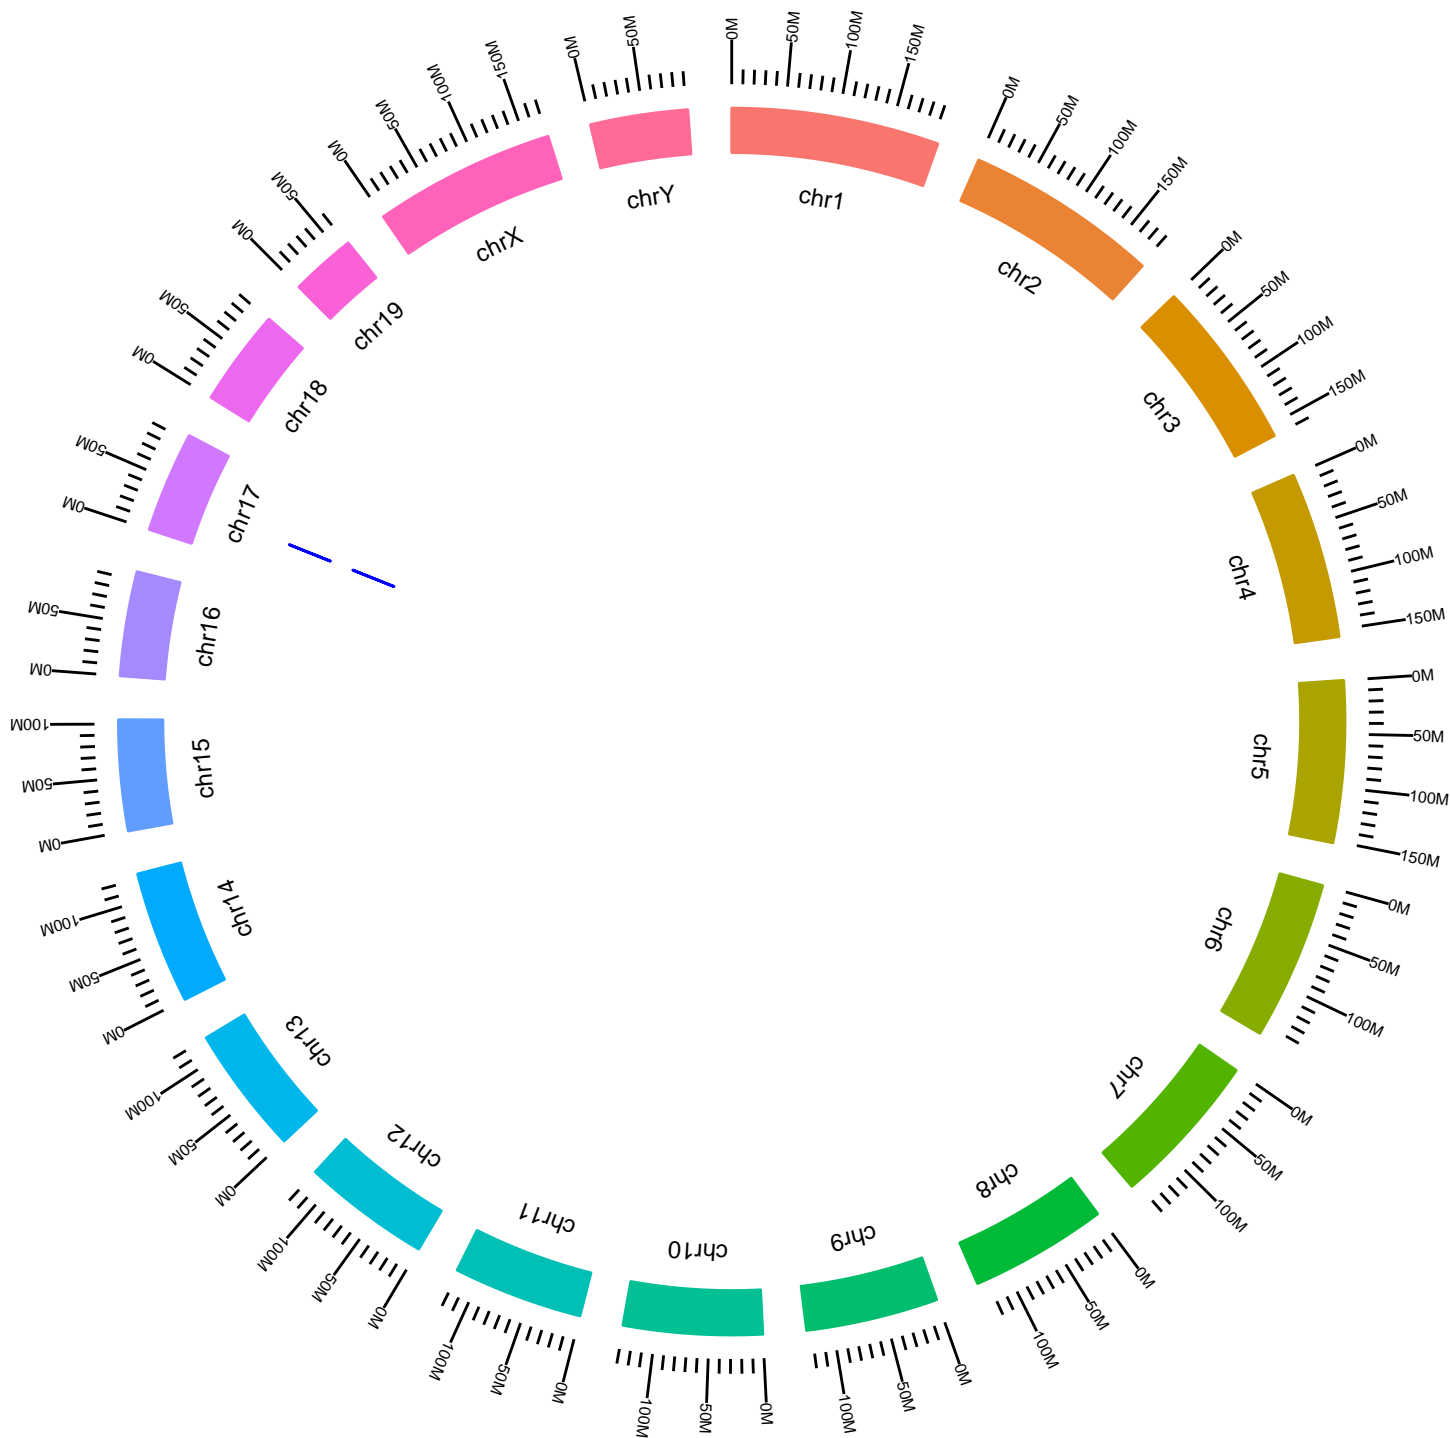

Supplement: Supplementary file 208 [file 18969356]

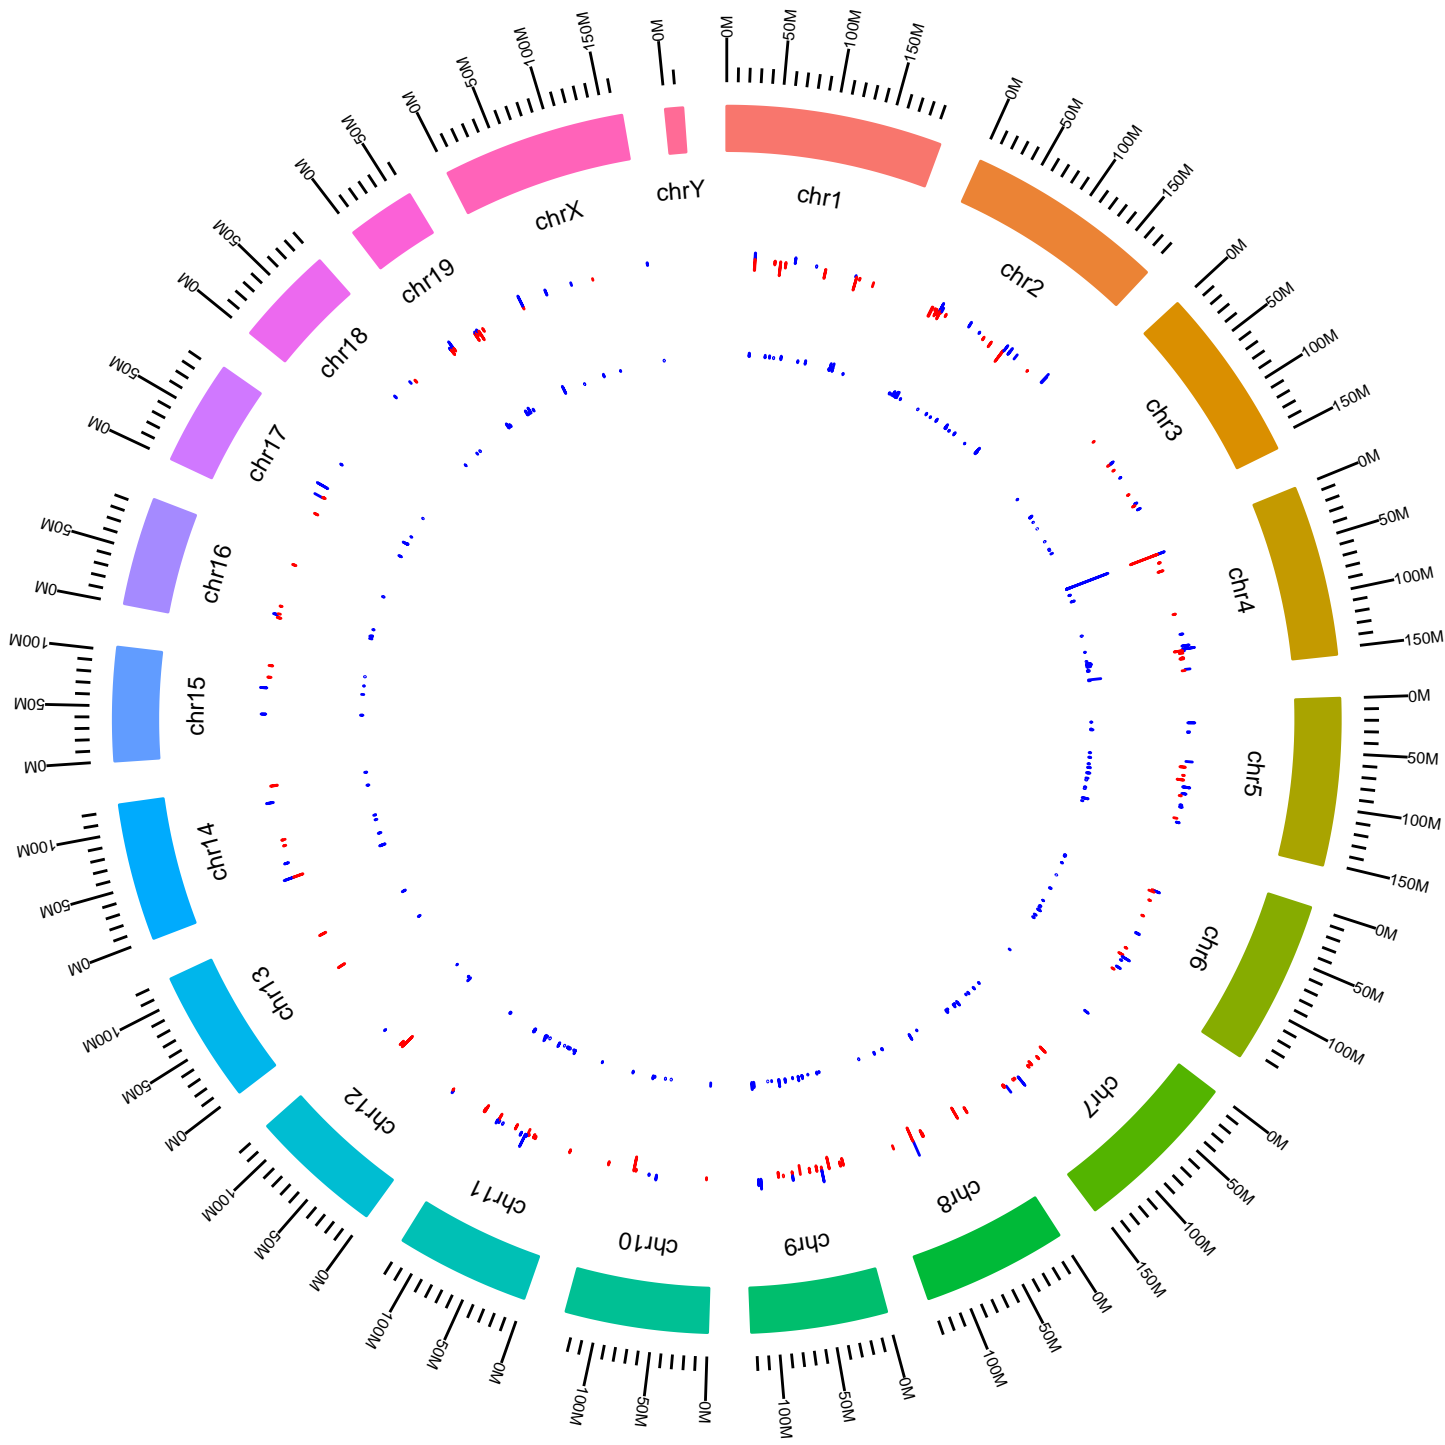

Supplement: Supplementary file 209 [file 18969356]

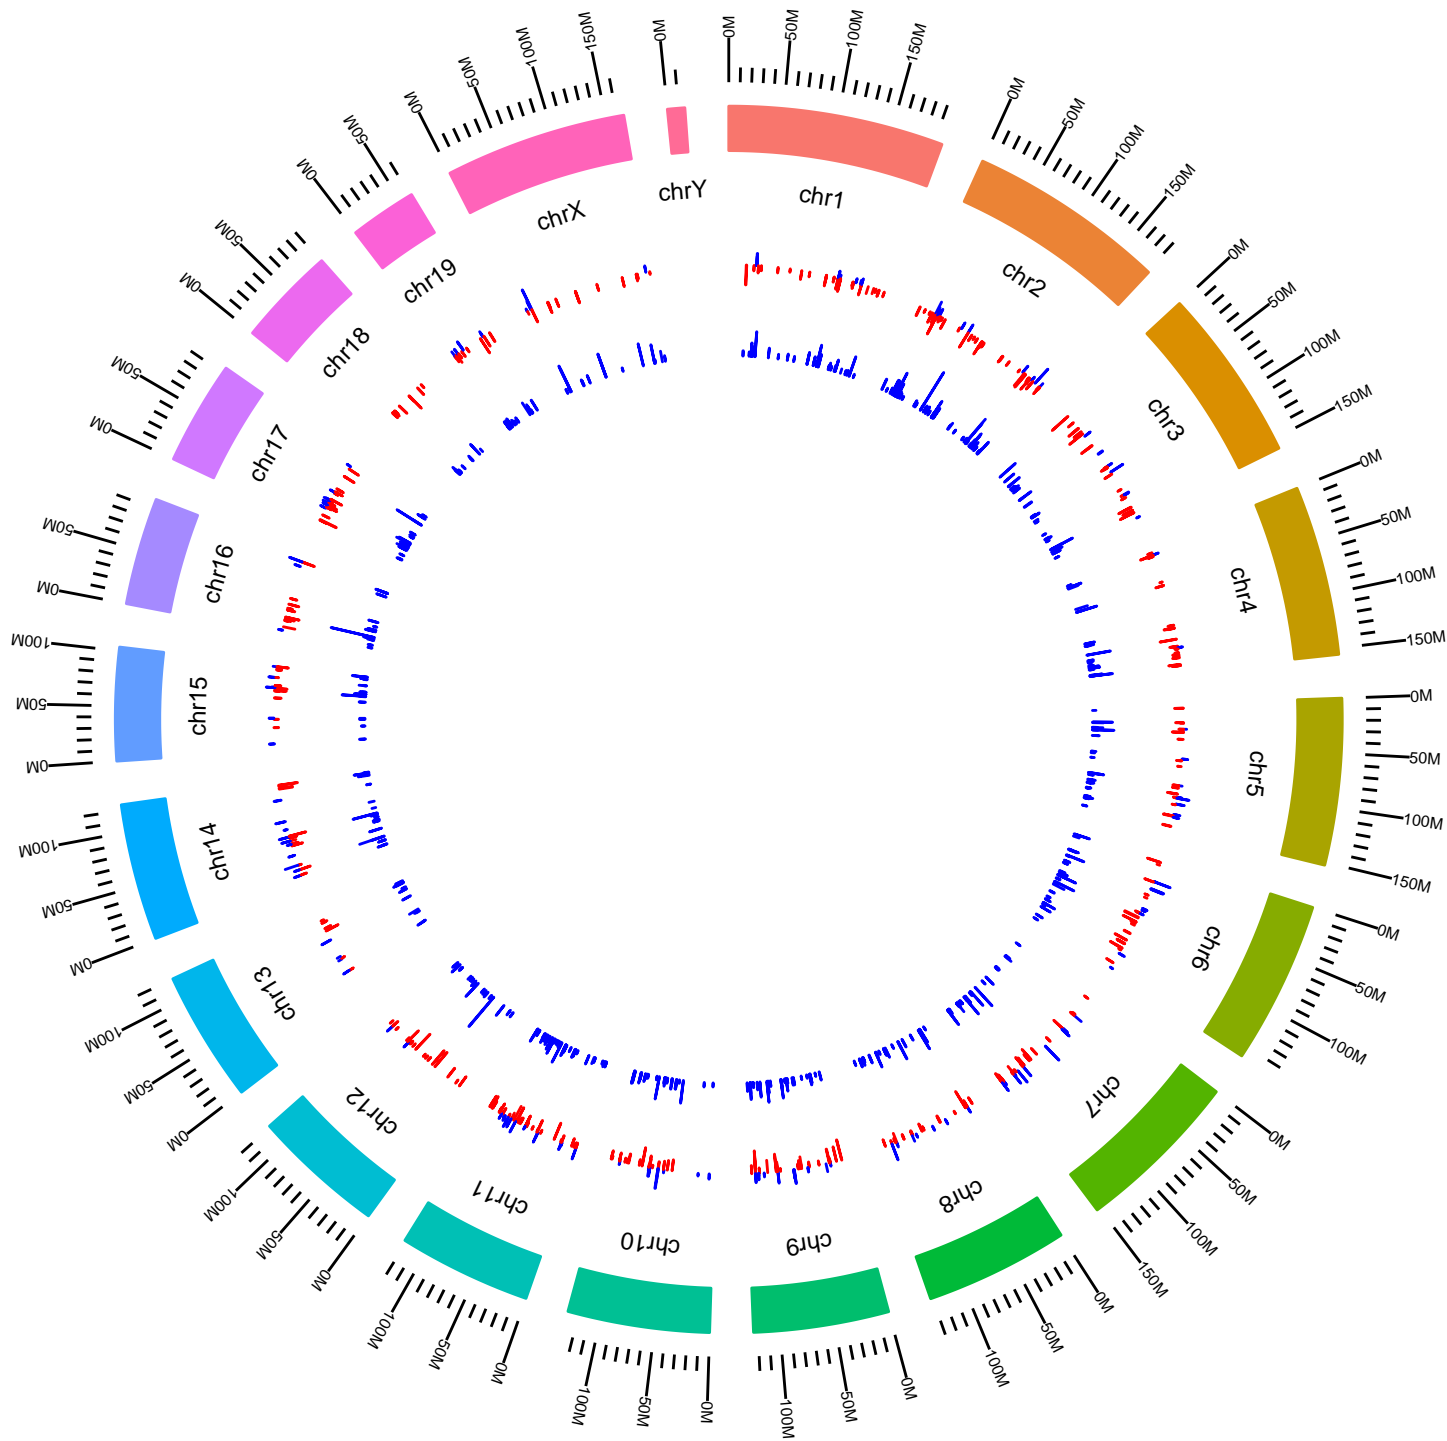

Supplement: Supplementary file 210 [file 18969356]

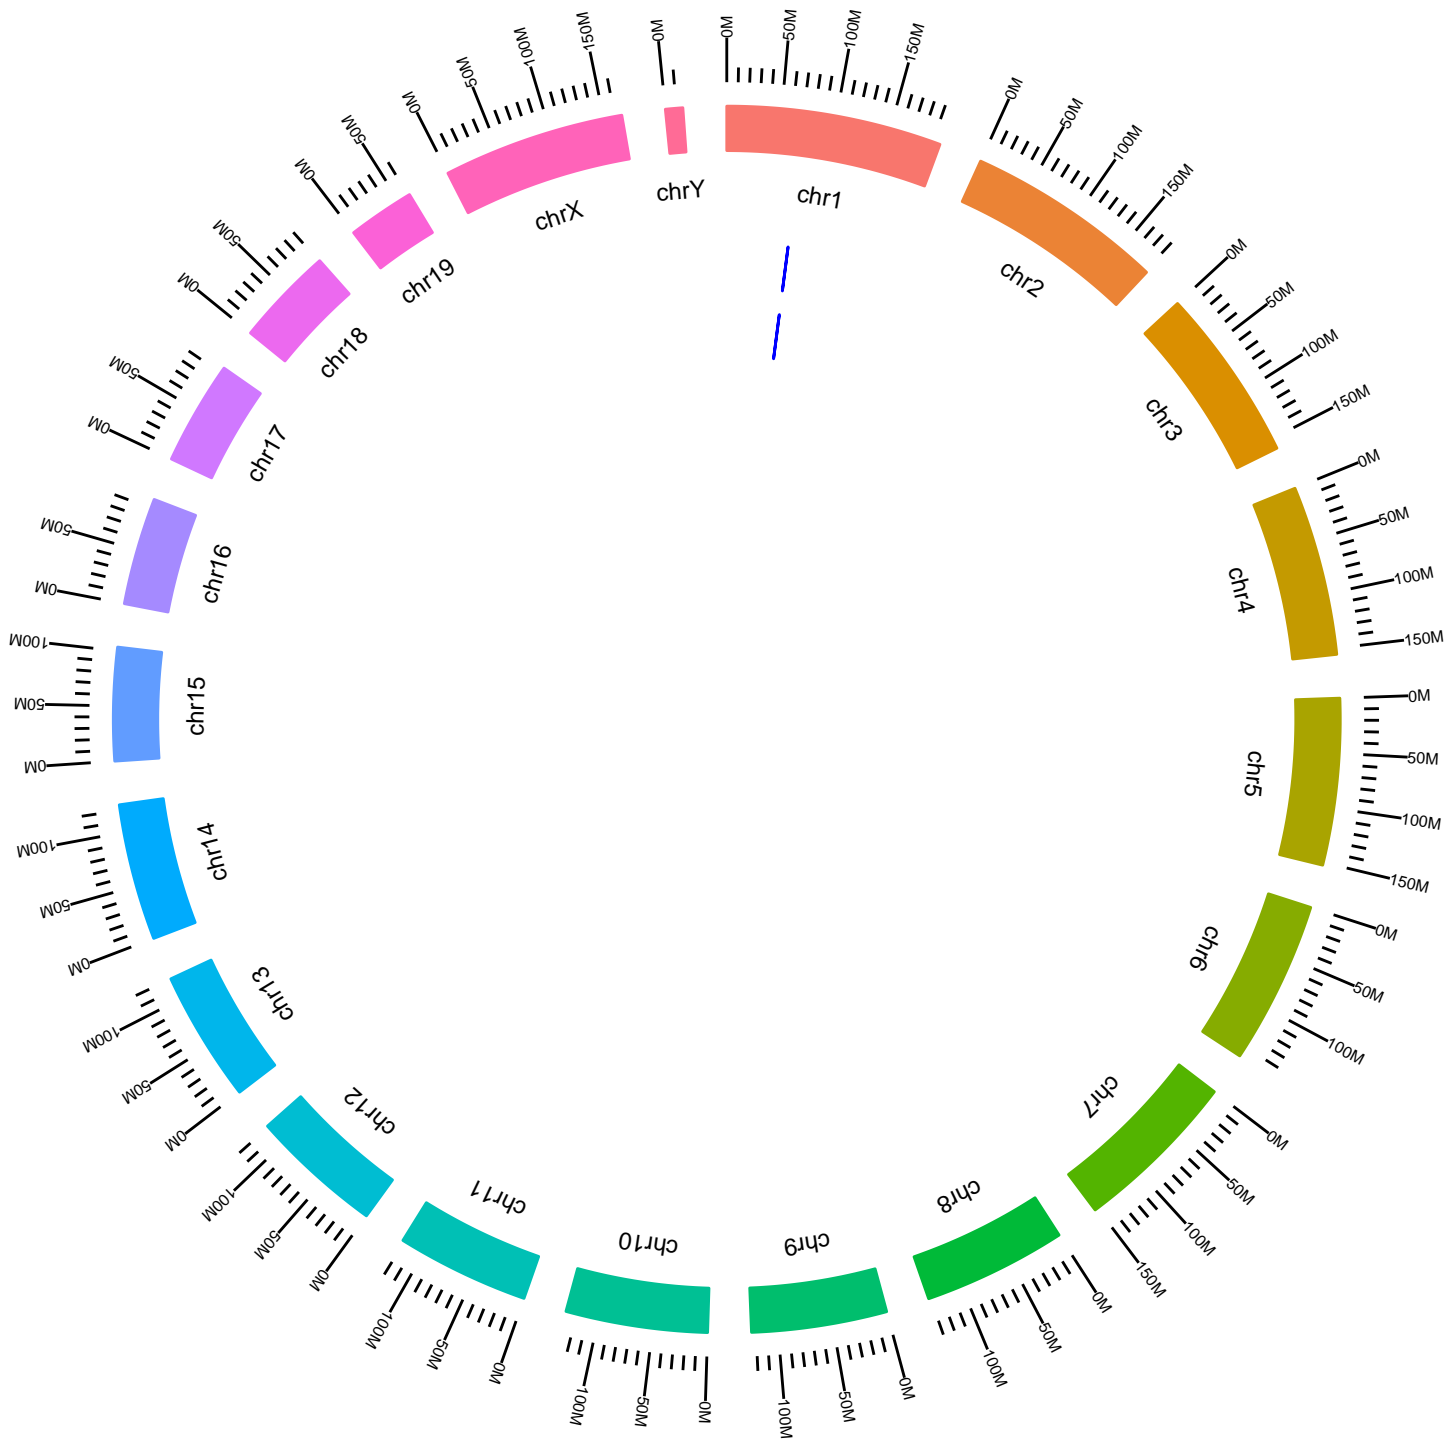

Supplement: Supplementary file 211 [file 18969356]

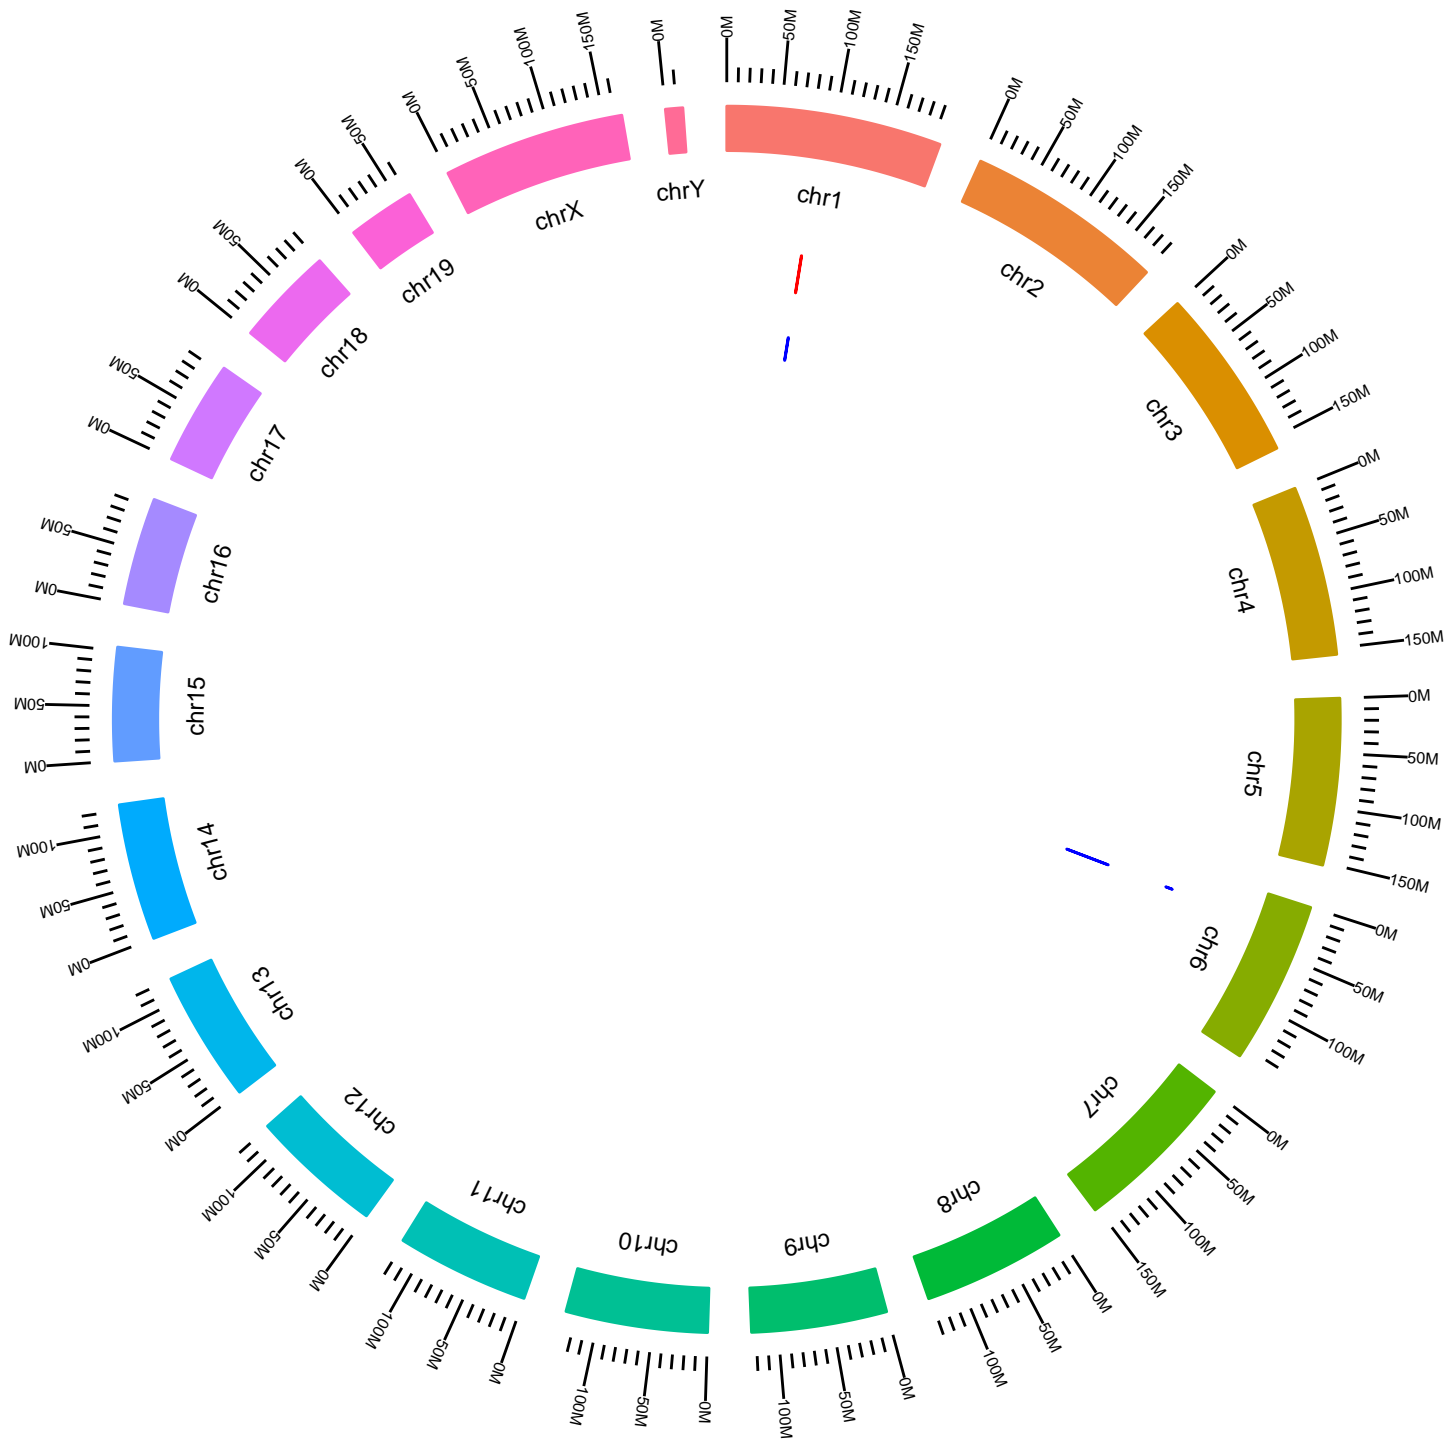

Supplement: Supplementary file 212 [file 18969356]

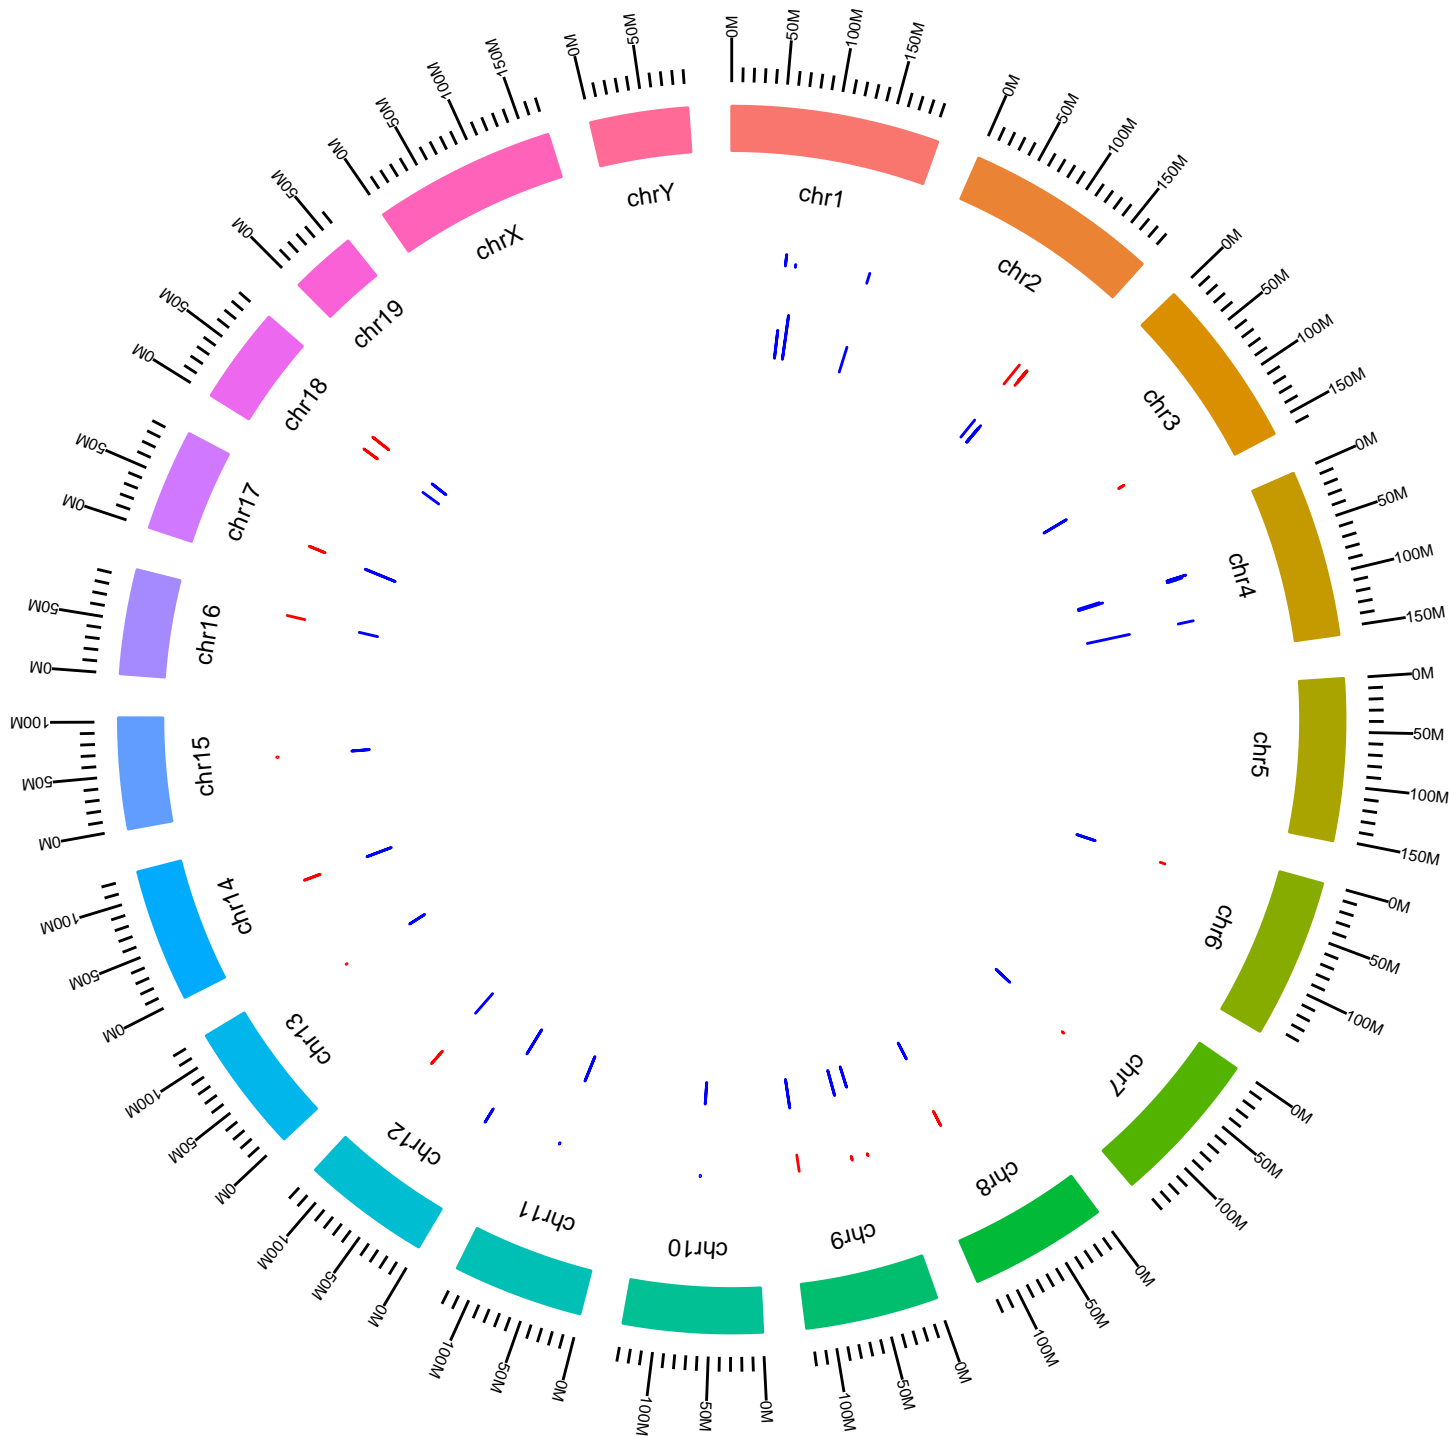

Supplement: Supplementary file 213 [file 18969356]

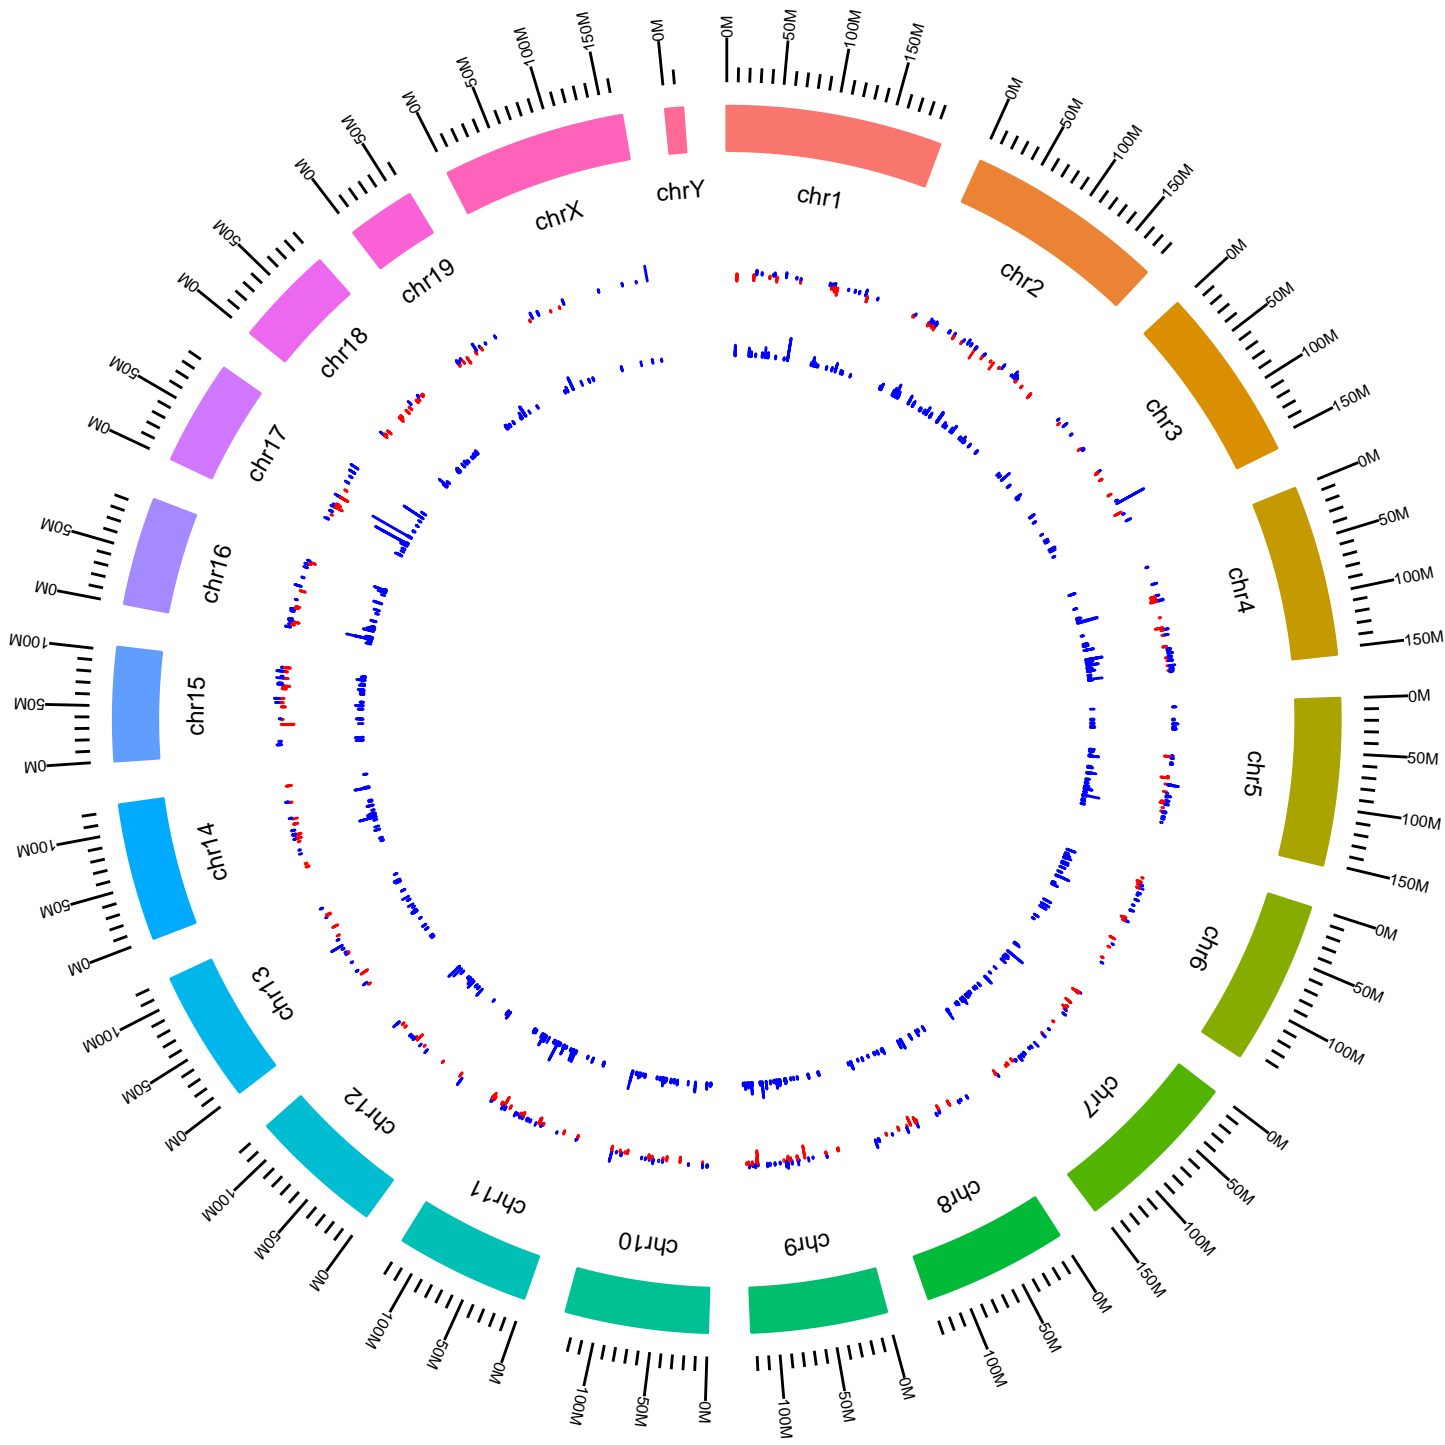

Supplement: Supplementary file 214 [file 18969356]

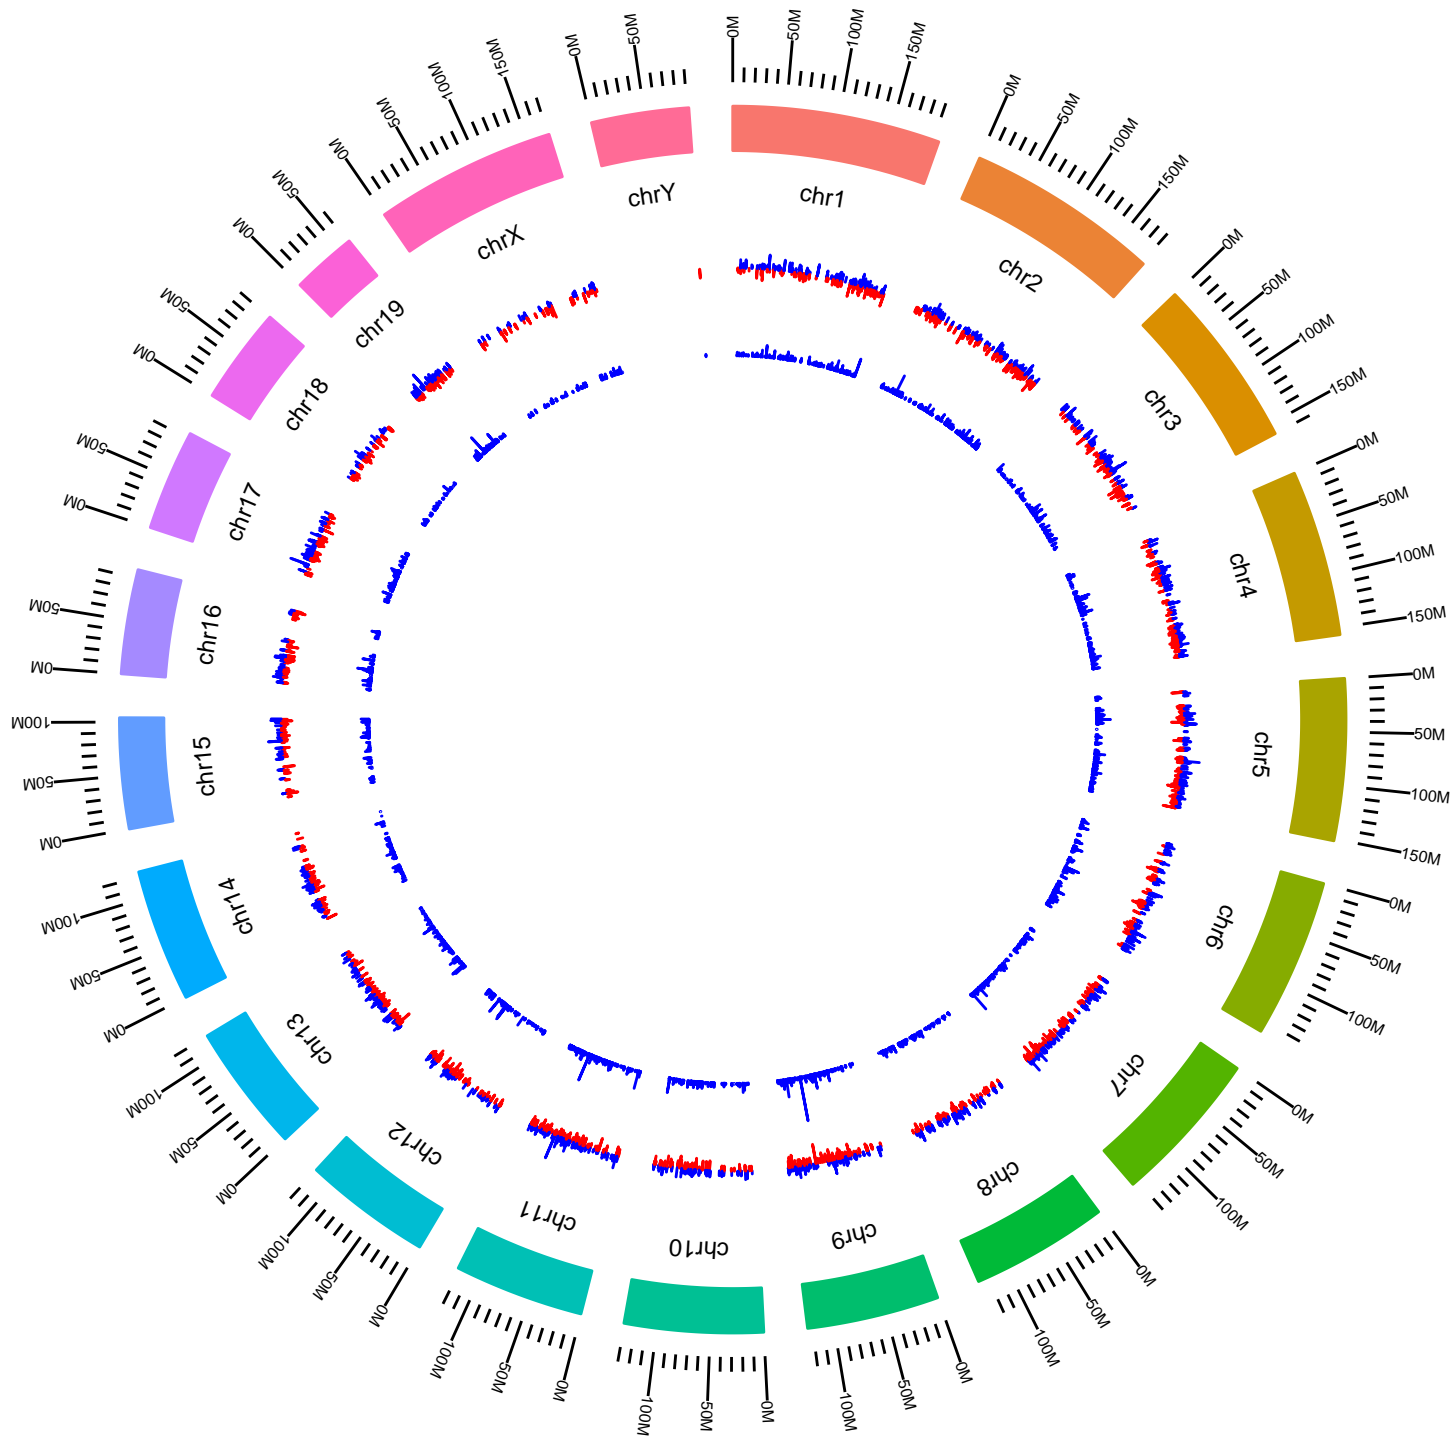

Supplement: Supplementary file 215 [file 18969356]

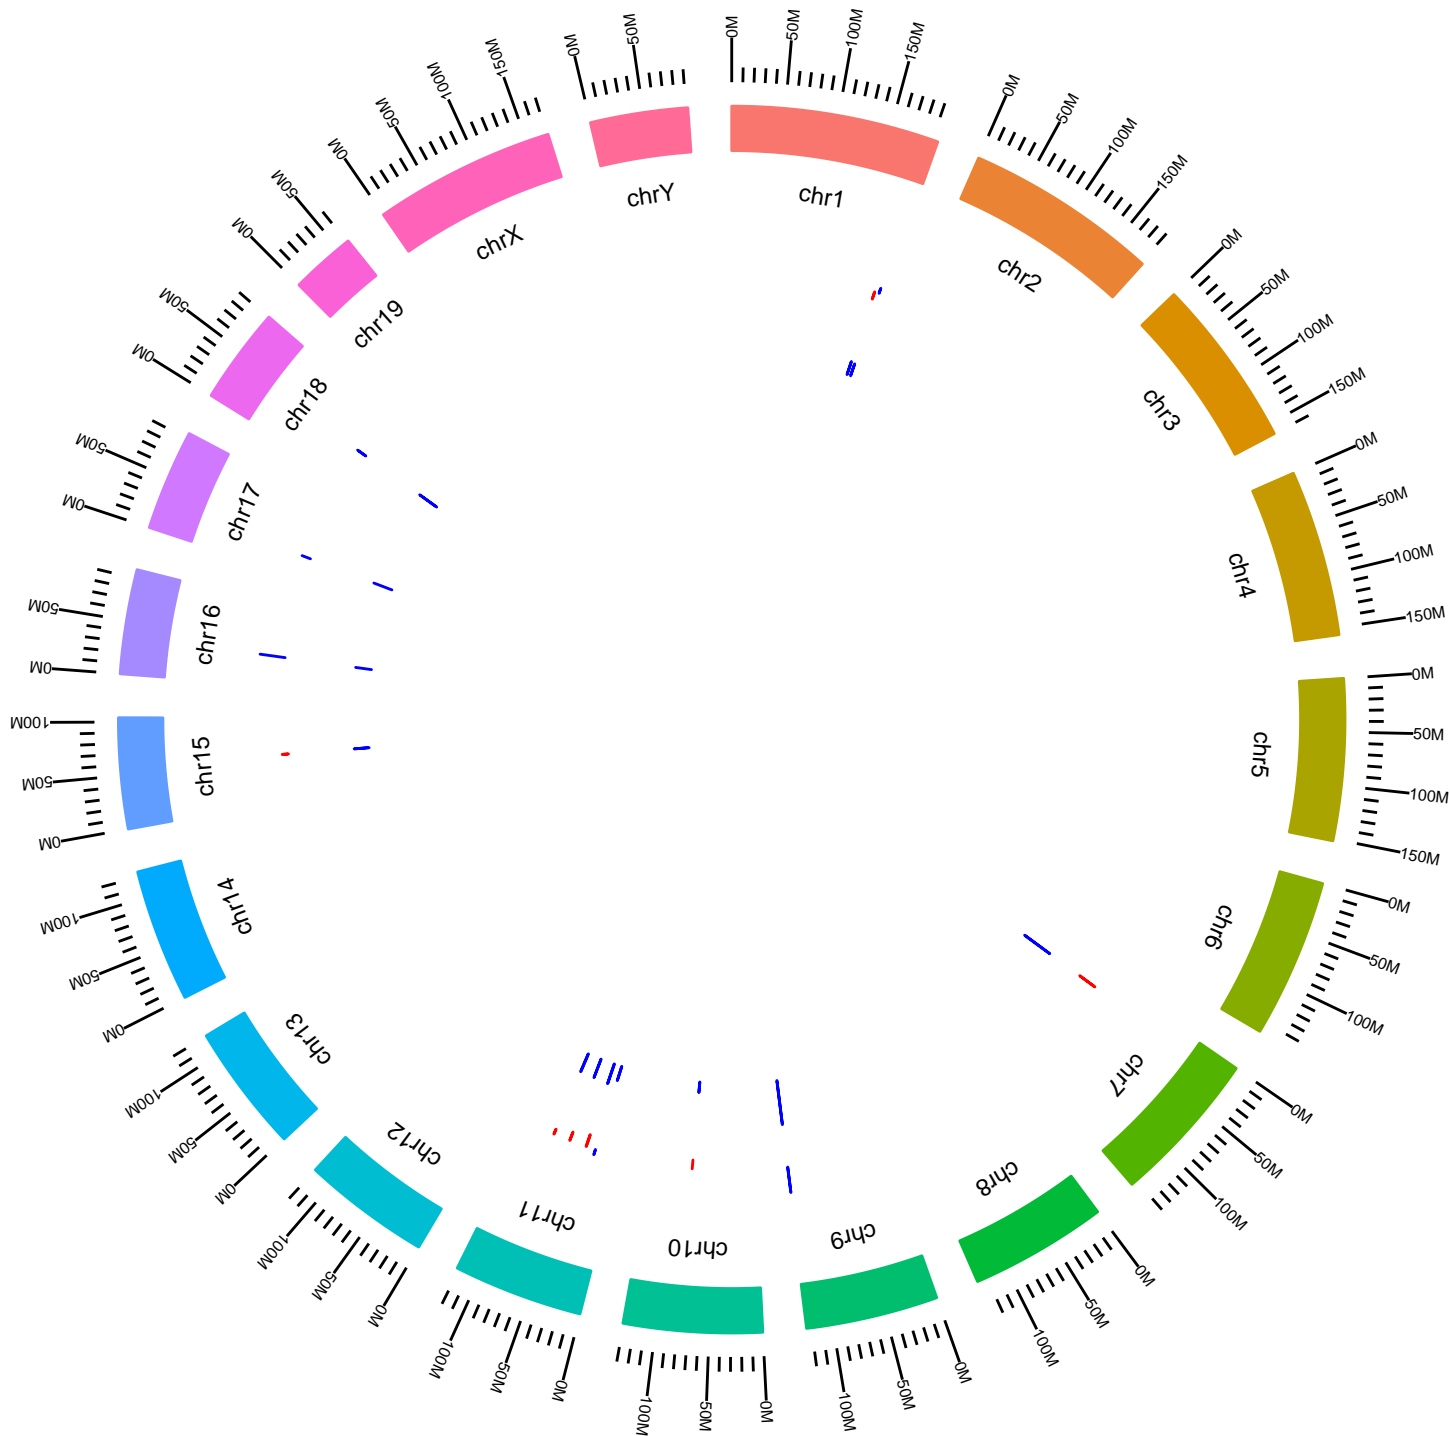

Supplement: Supplementary file 216 [file 18969356]

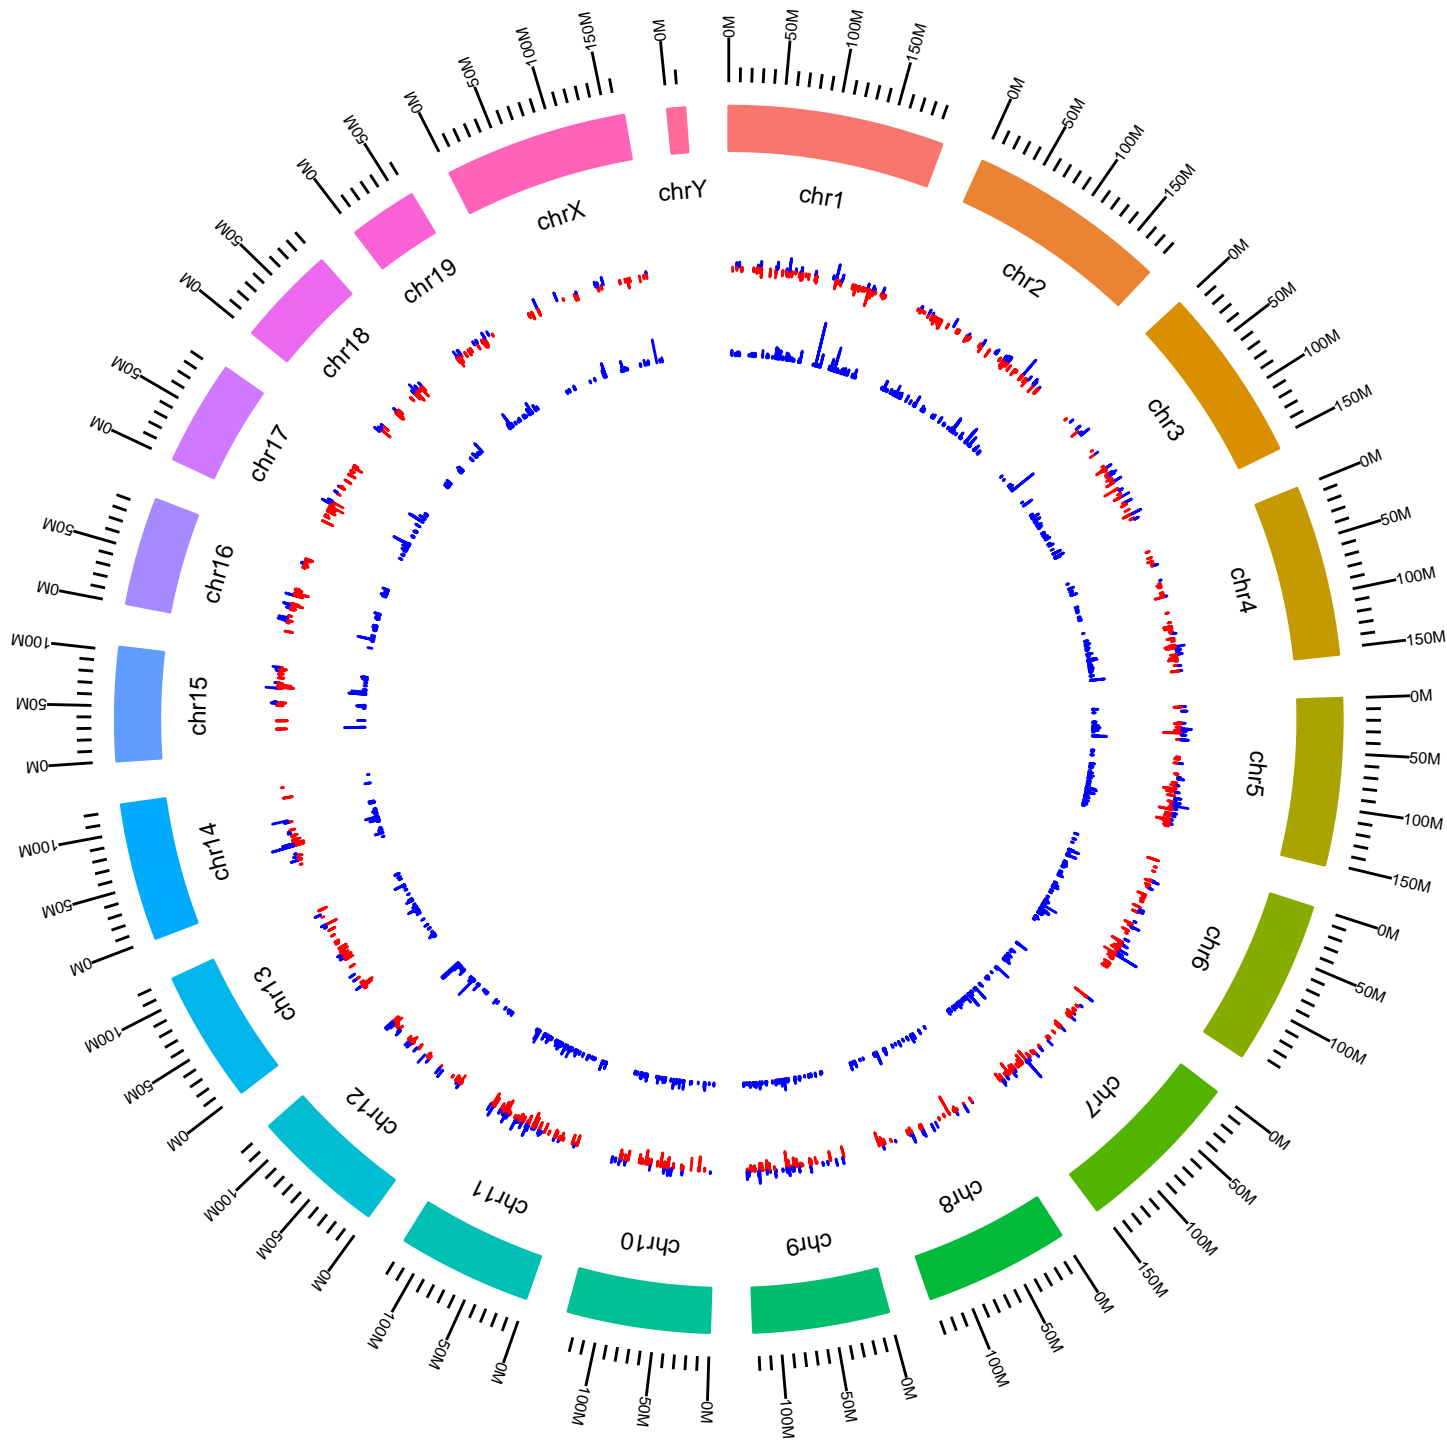

Supplement: Supplementary file 217 [file 18969356]

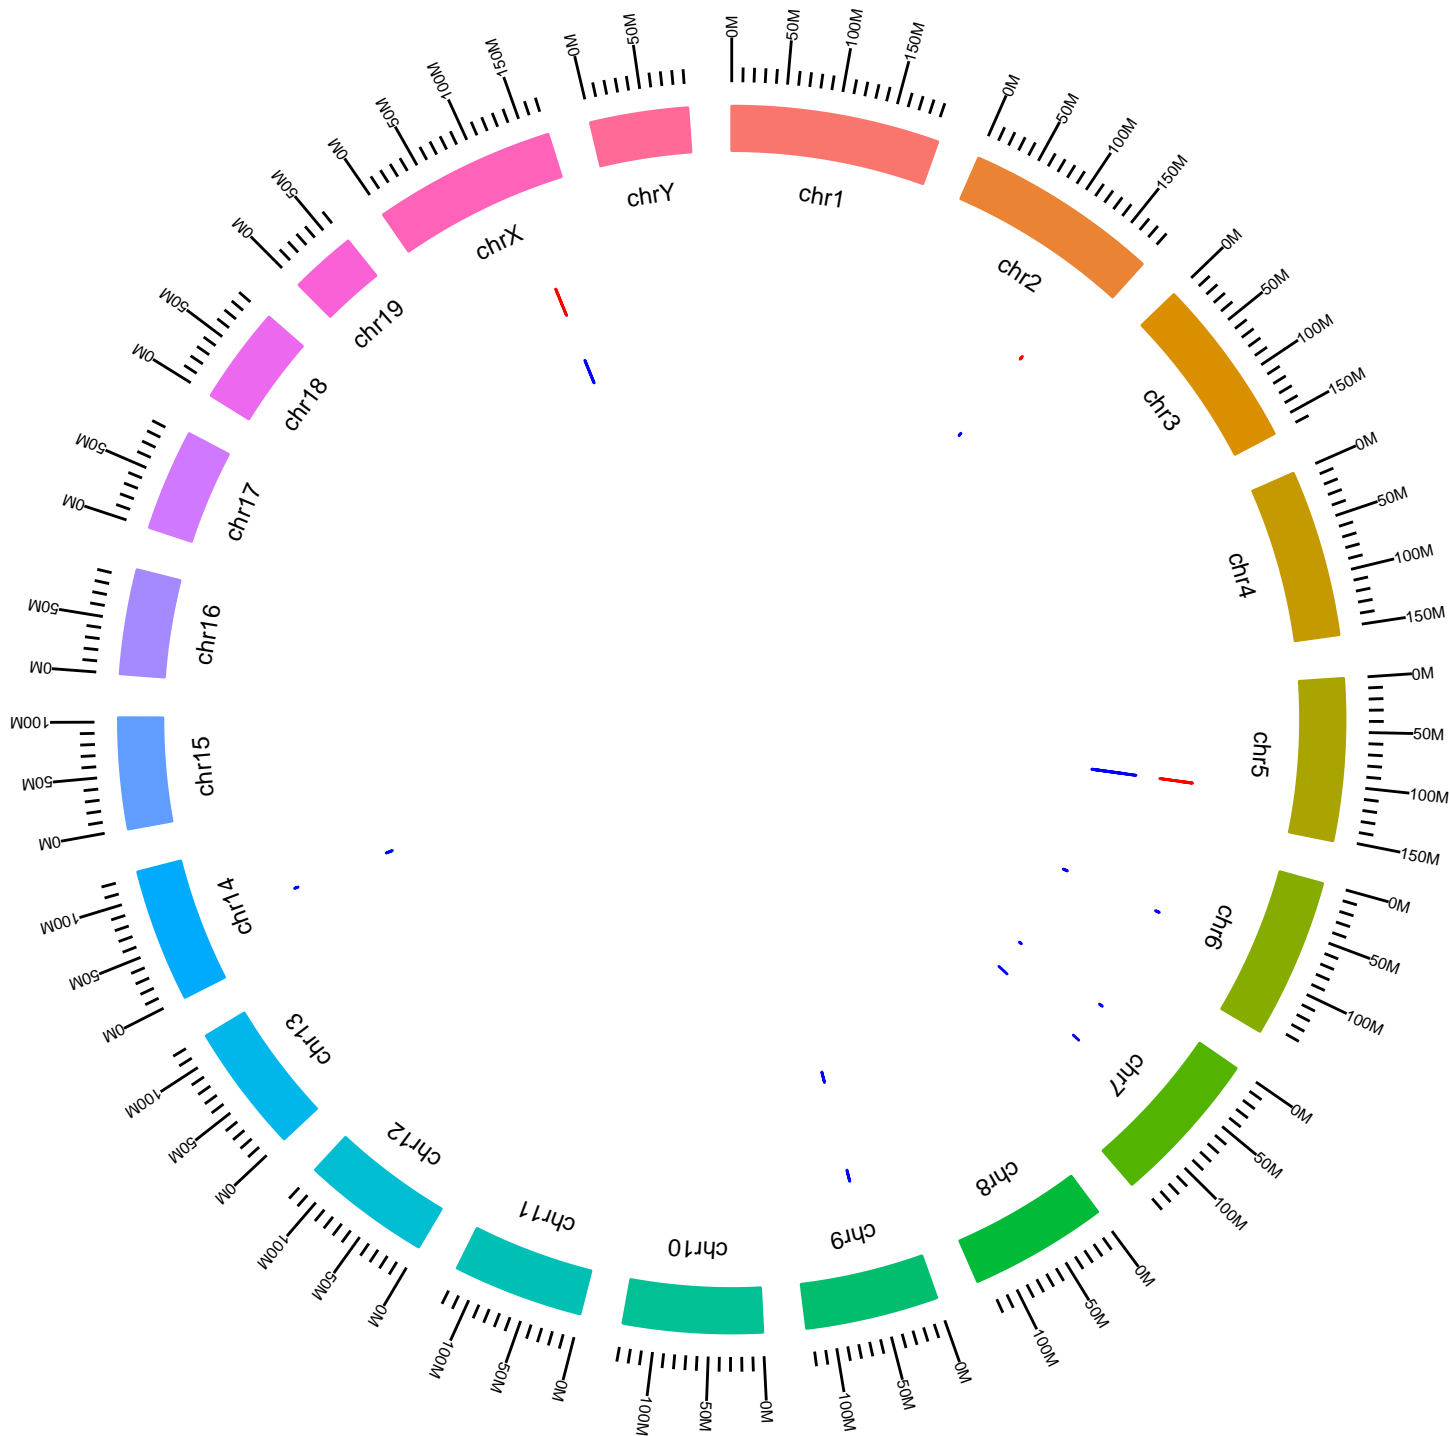

Supplement: Supplementary file 218 [file 18969356]

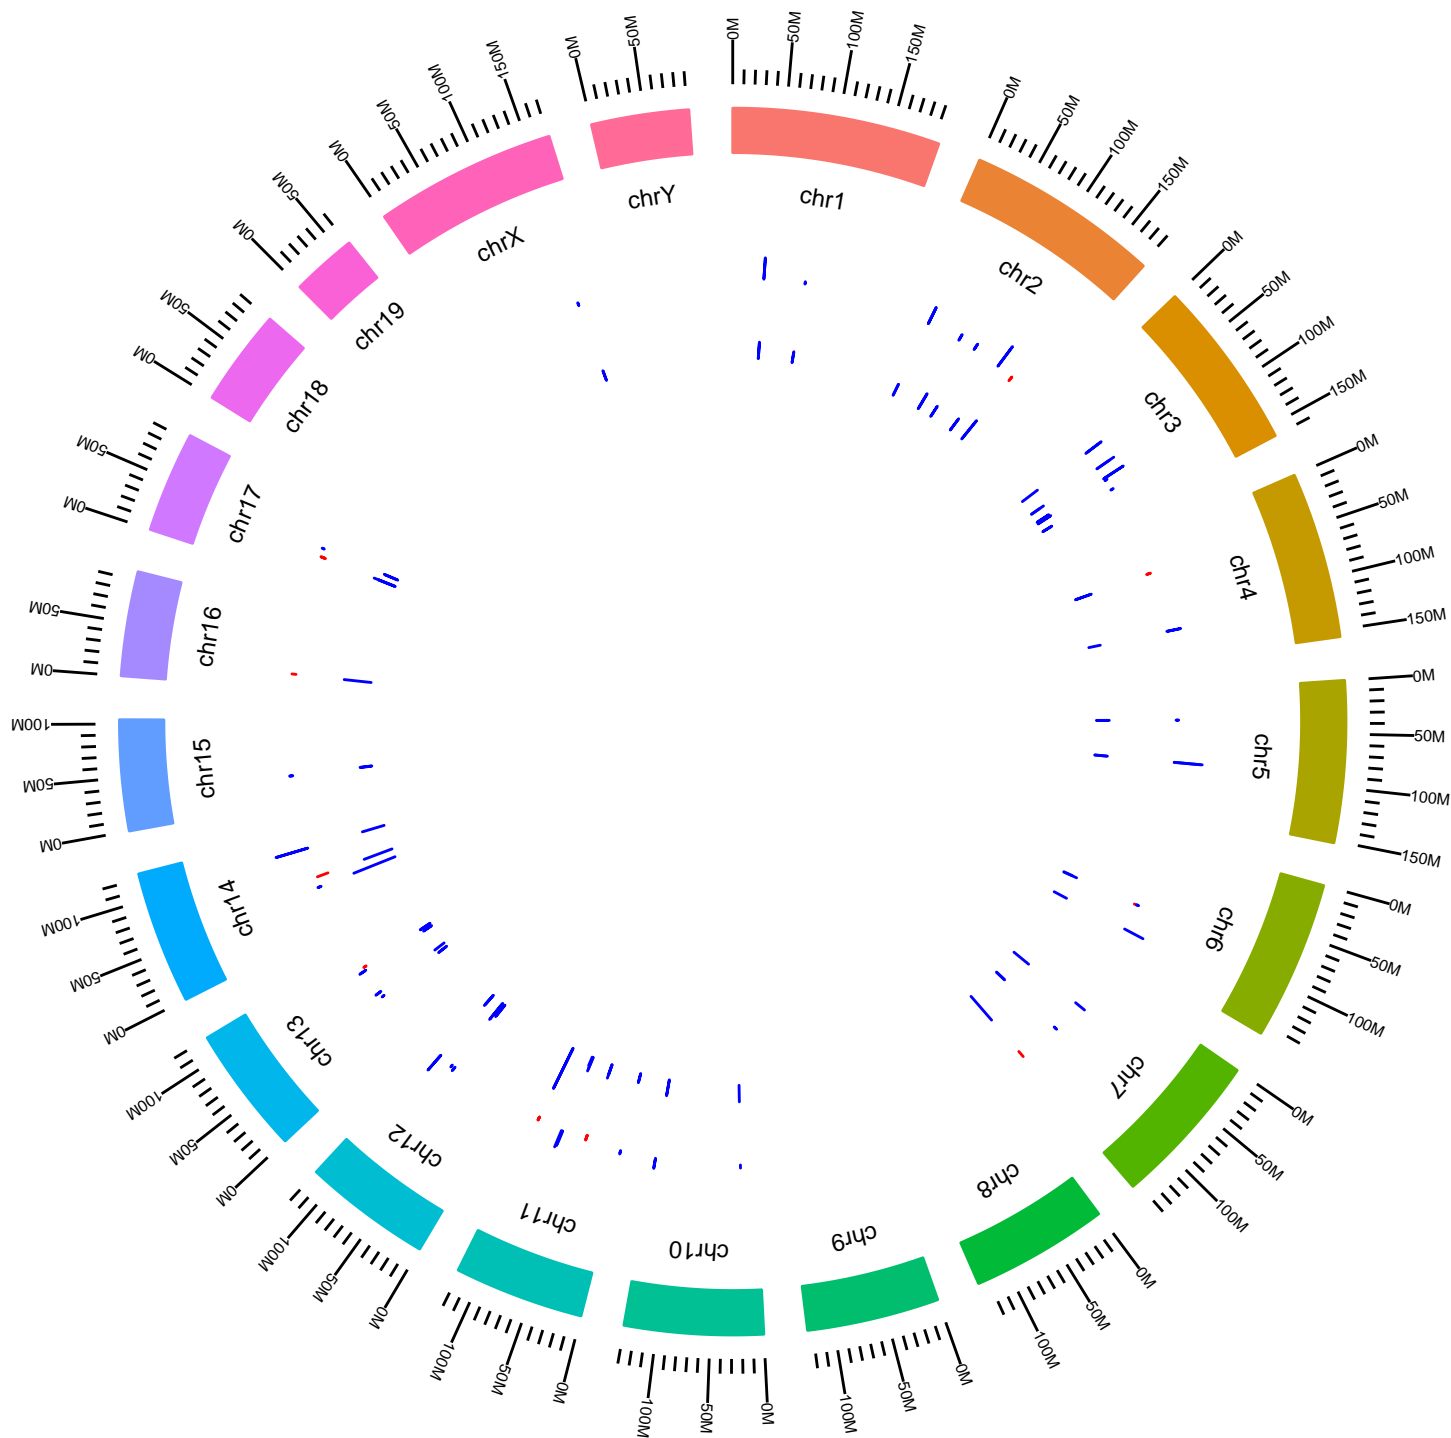

Supplement: Supplementary file 219 [file 18969356]

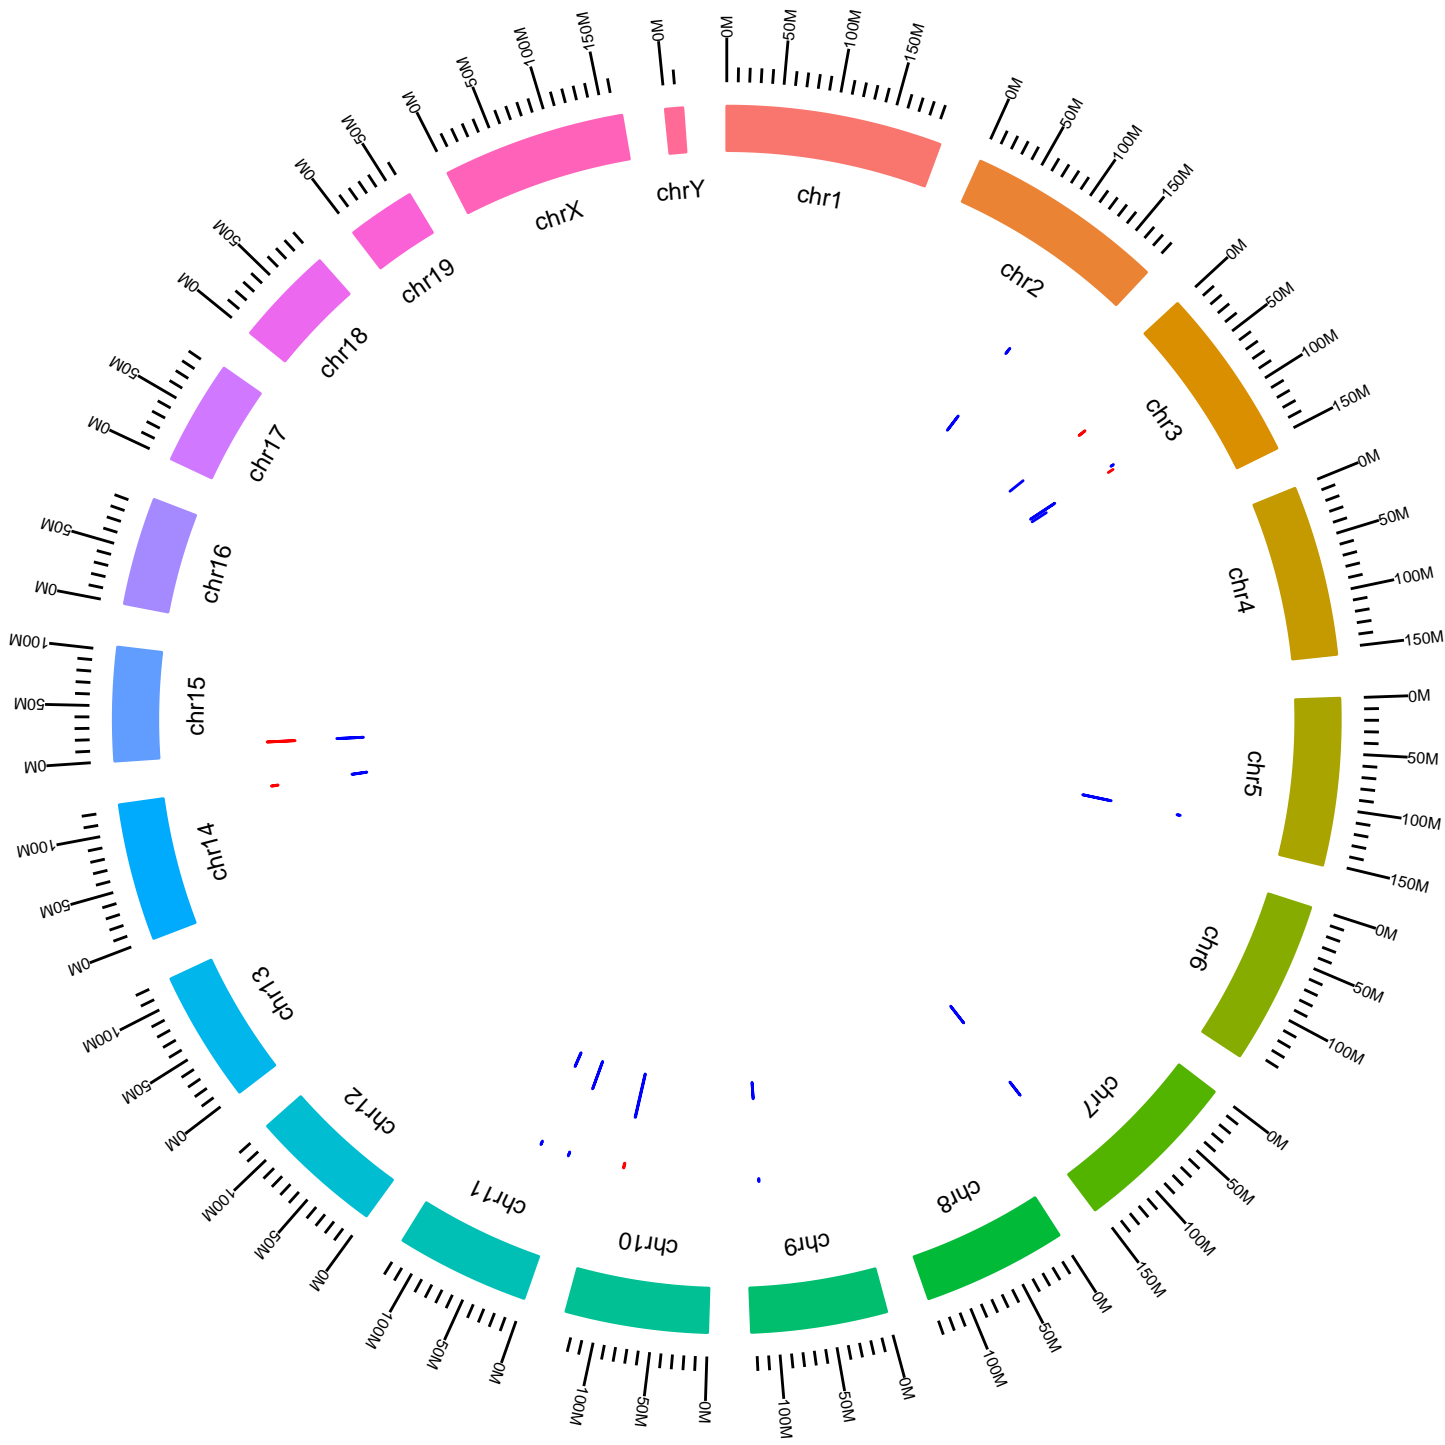

Supplement: Supplementary file 220 [file 18969356]

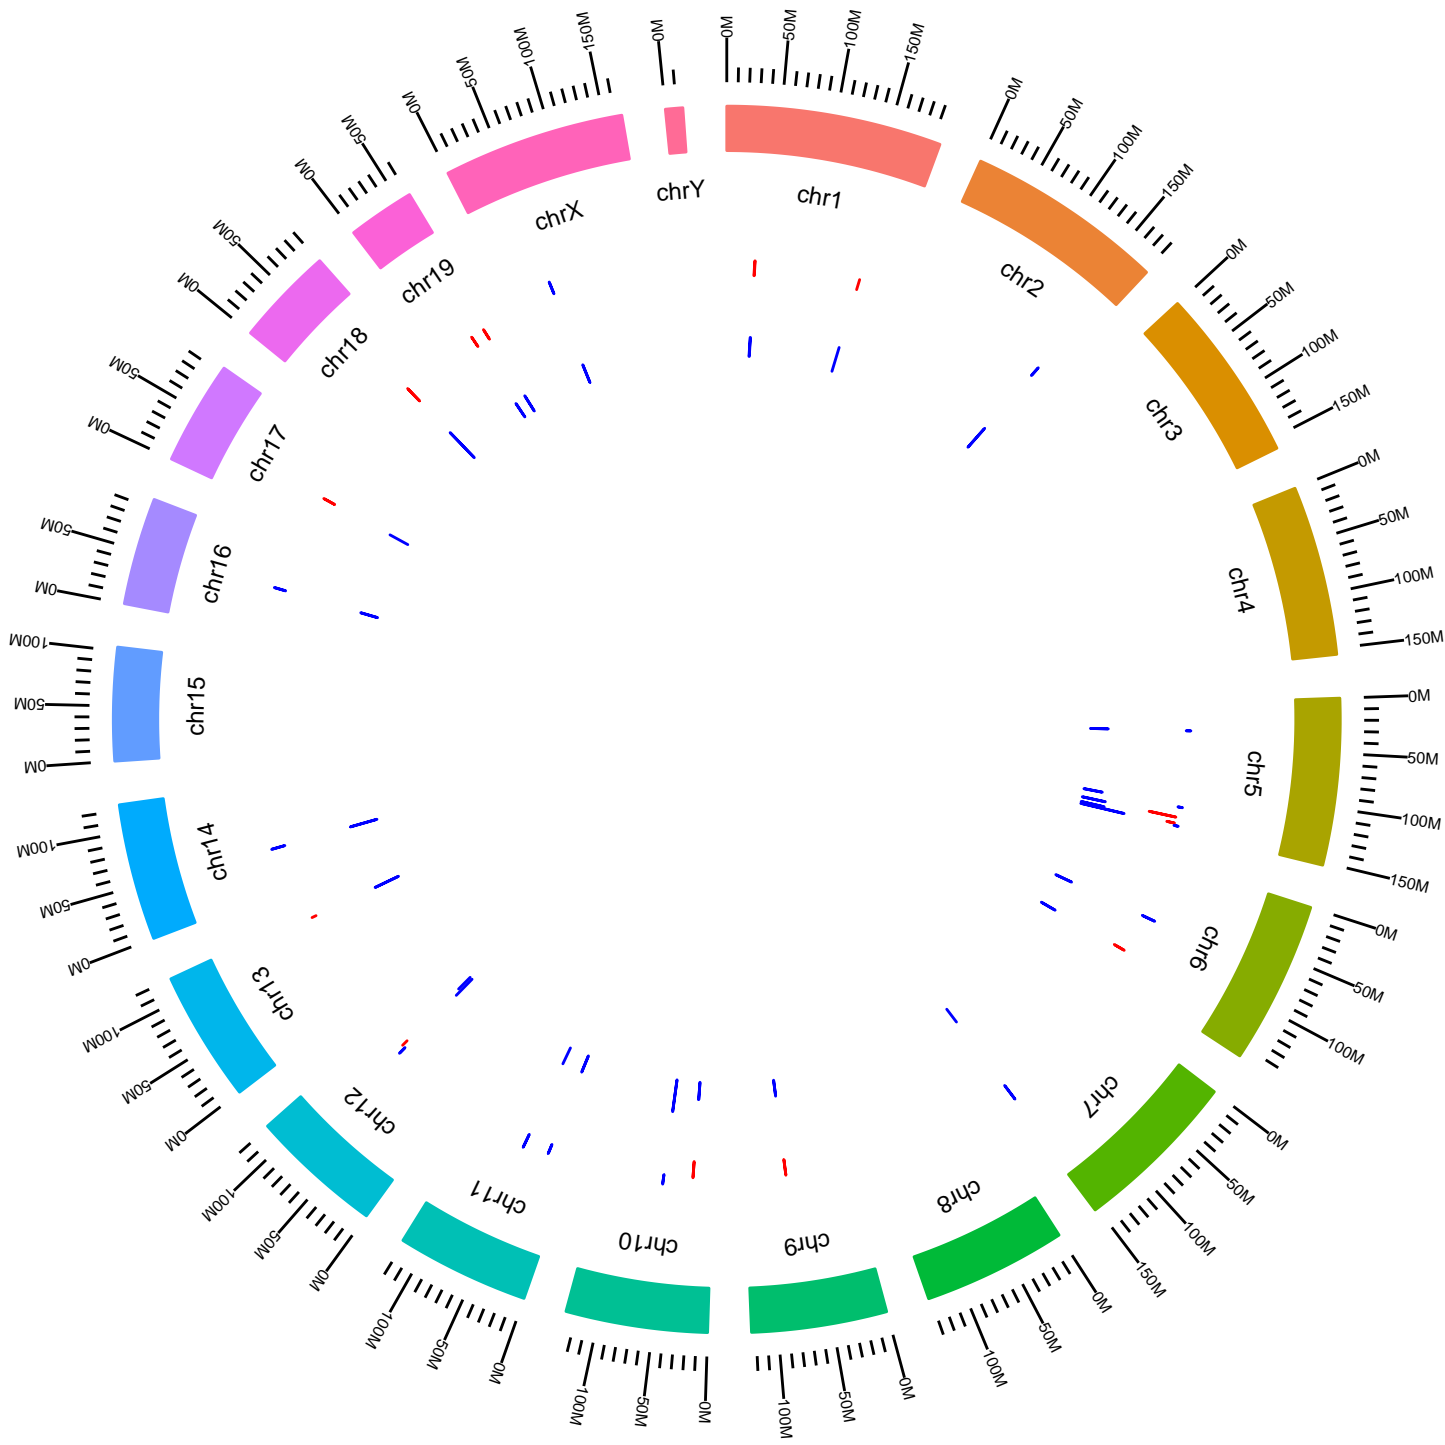

Supplement: Supplementary file 221 [file 18969356]

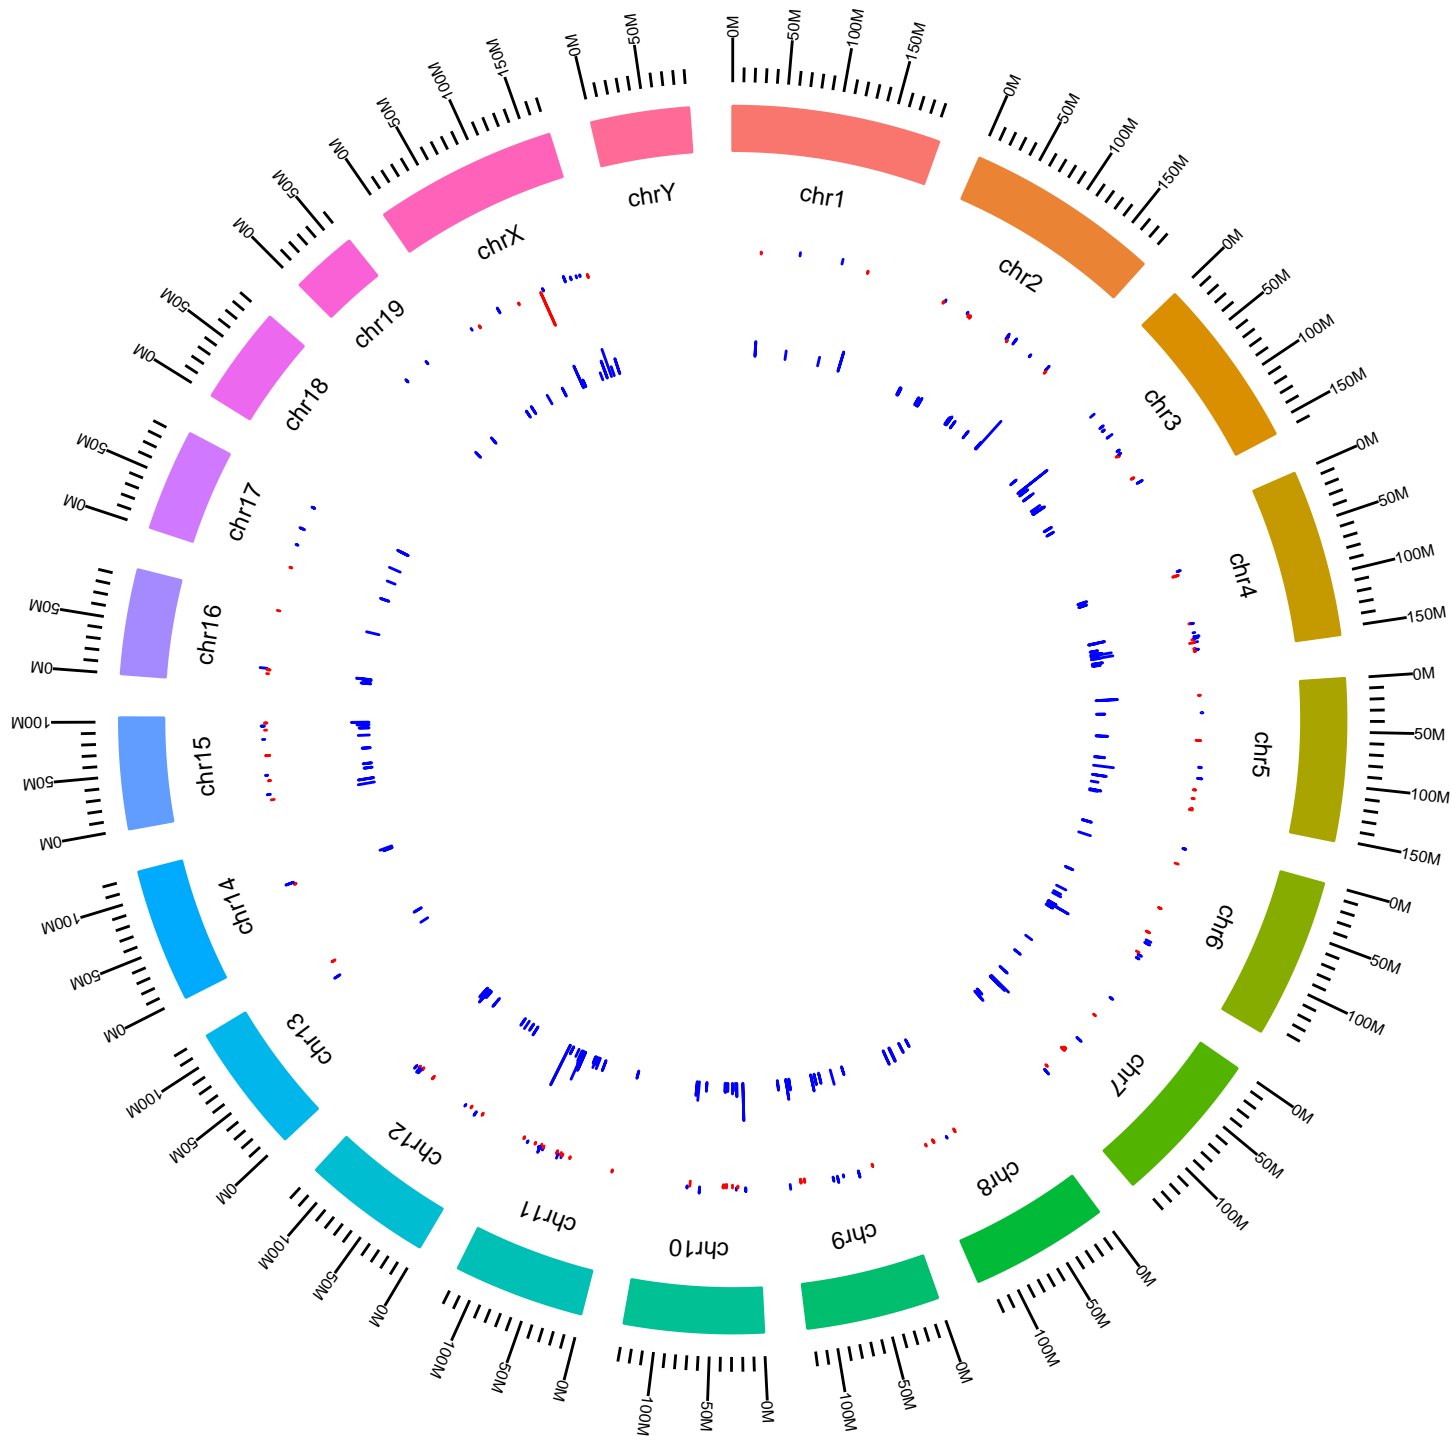

Supplement: Supplementary file 222 [file 18969356]

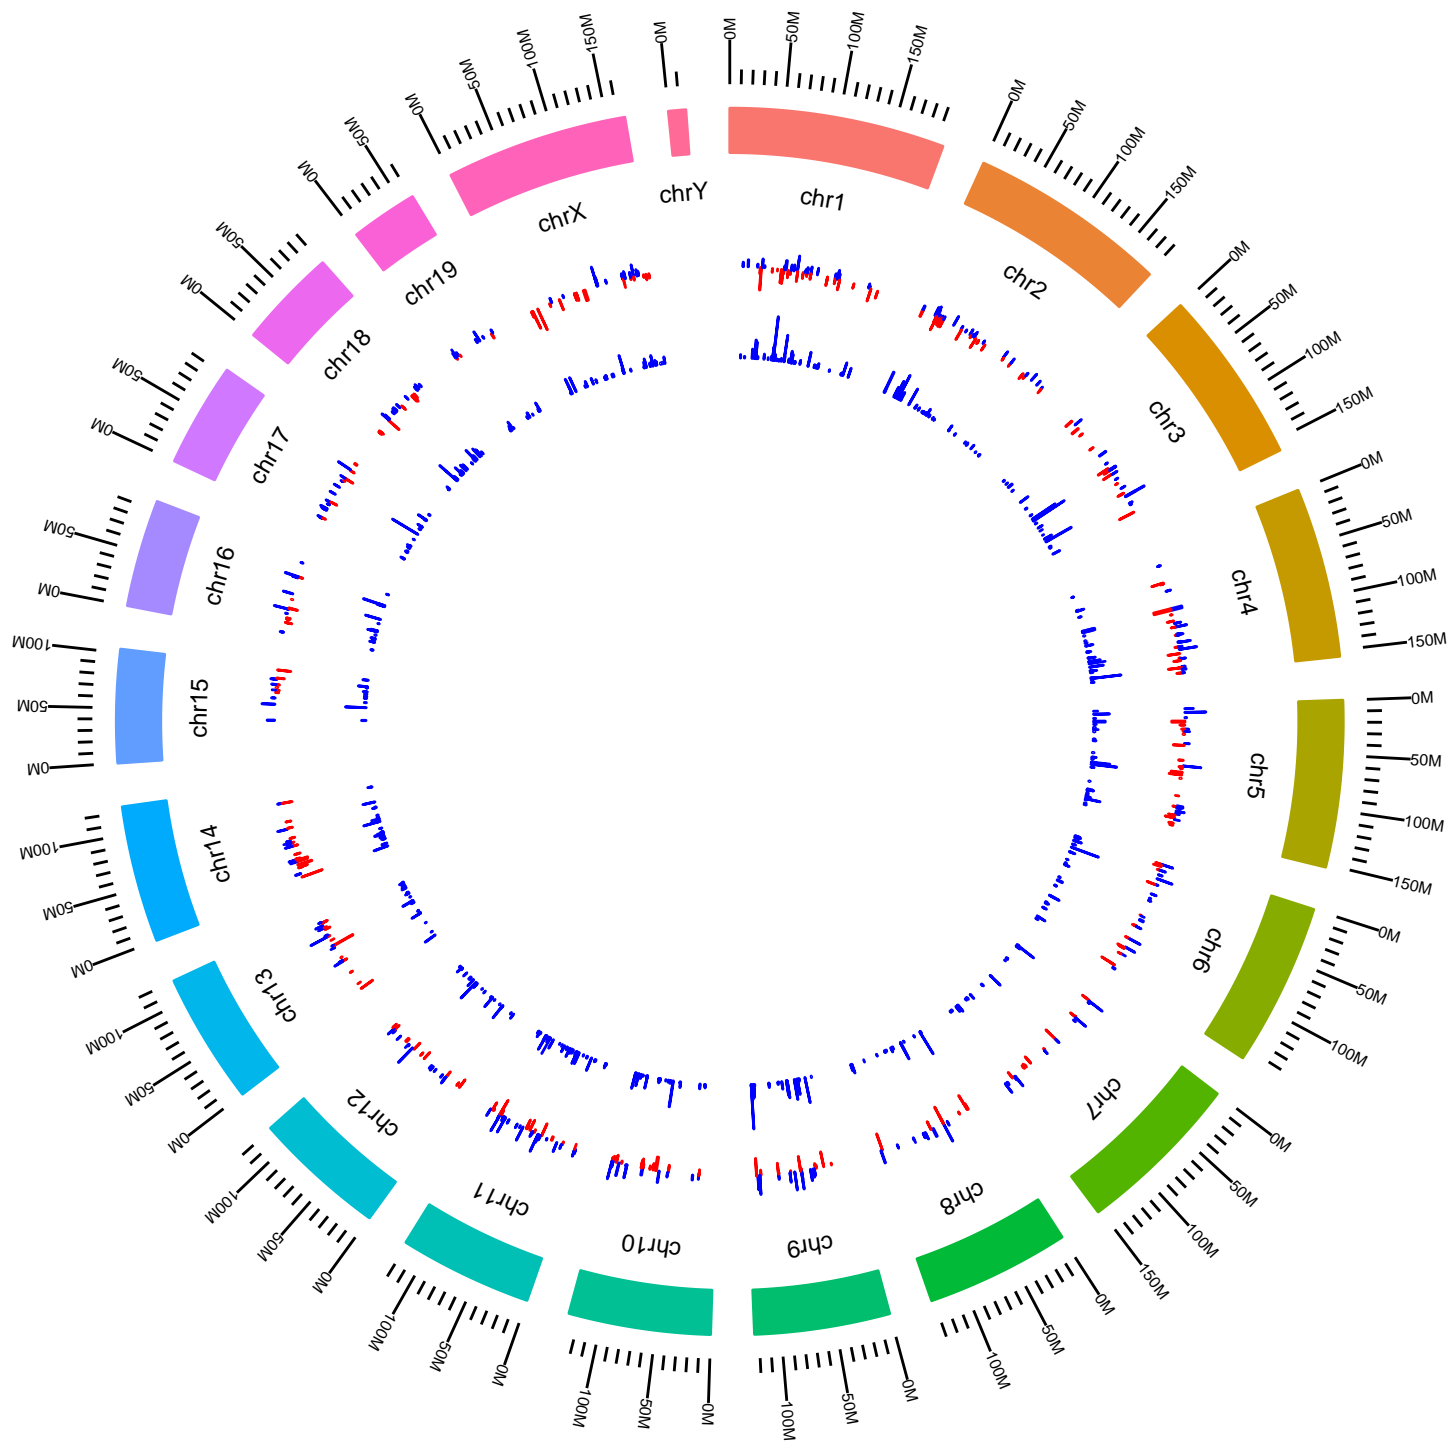

Supplement: Supplementary file 223 [file 18969356]

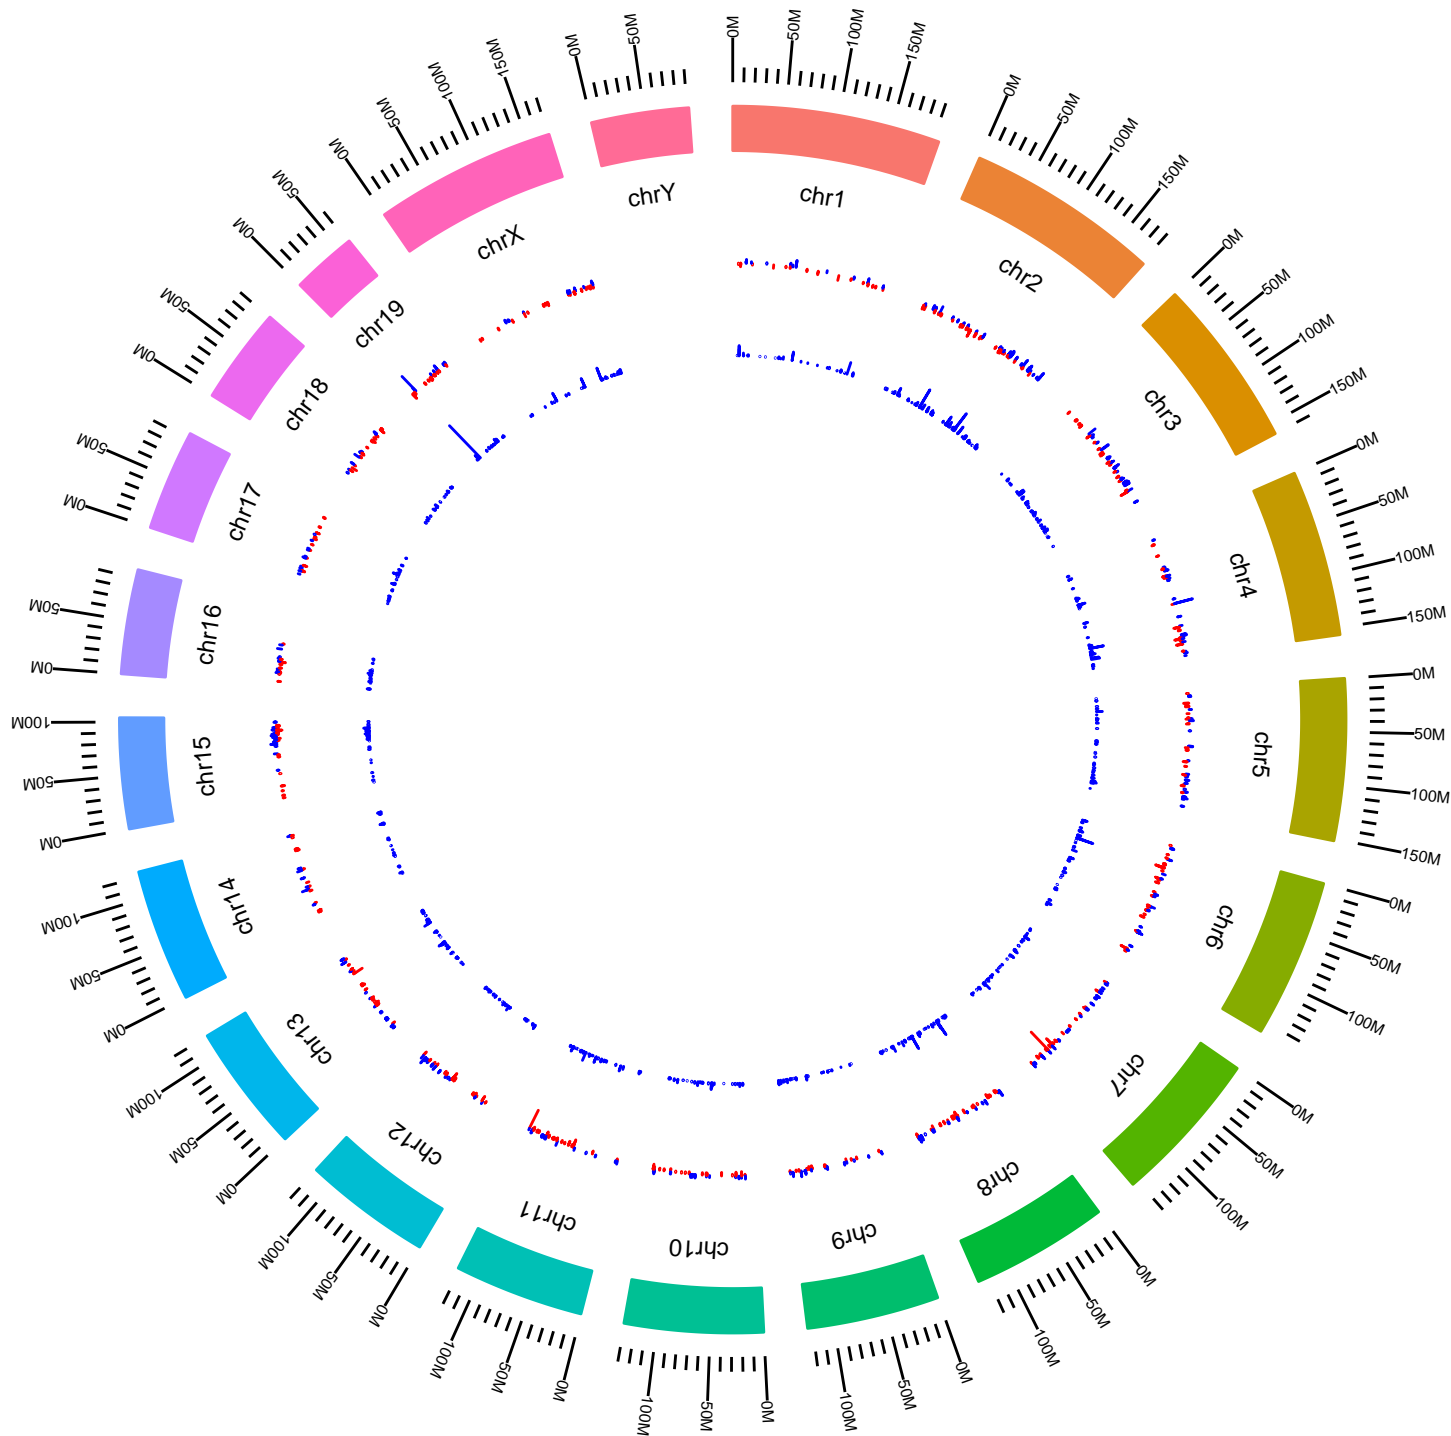

Supplement: Supplementary file 224 [file 18969356]

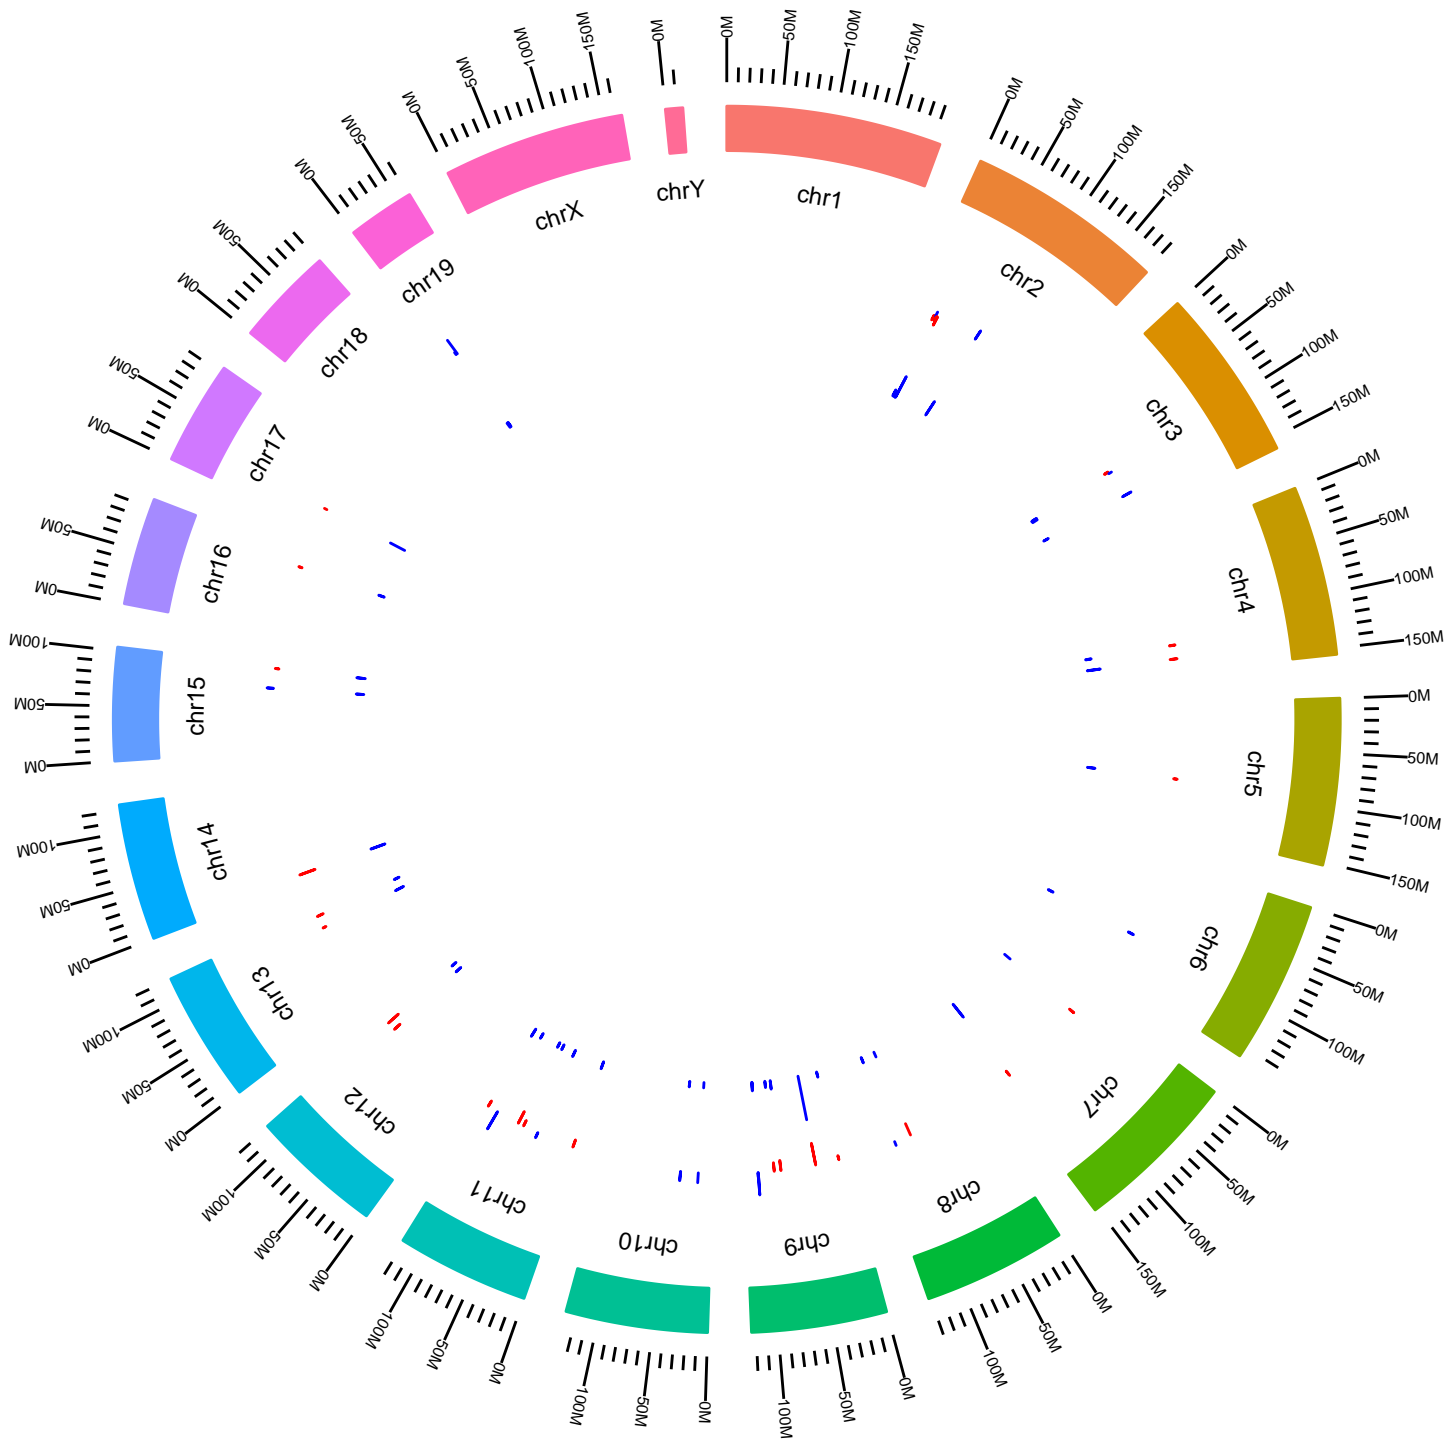

Supplement: Supplementary file 225 [file 18969356]

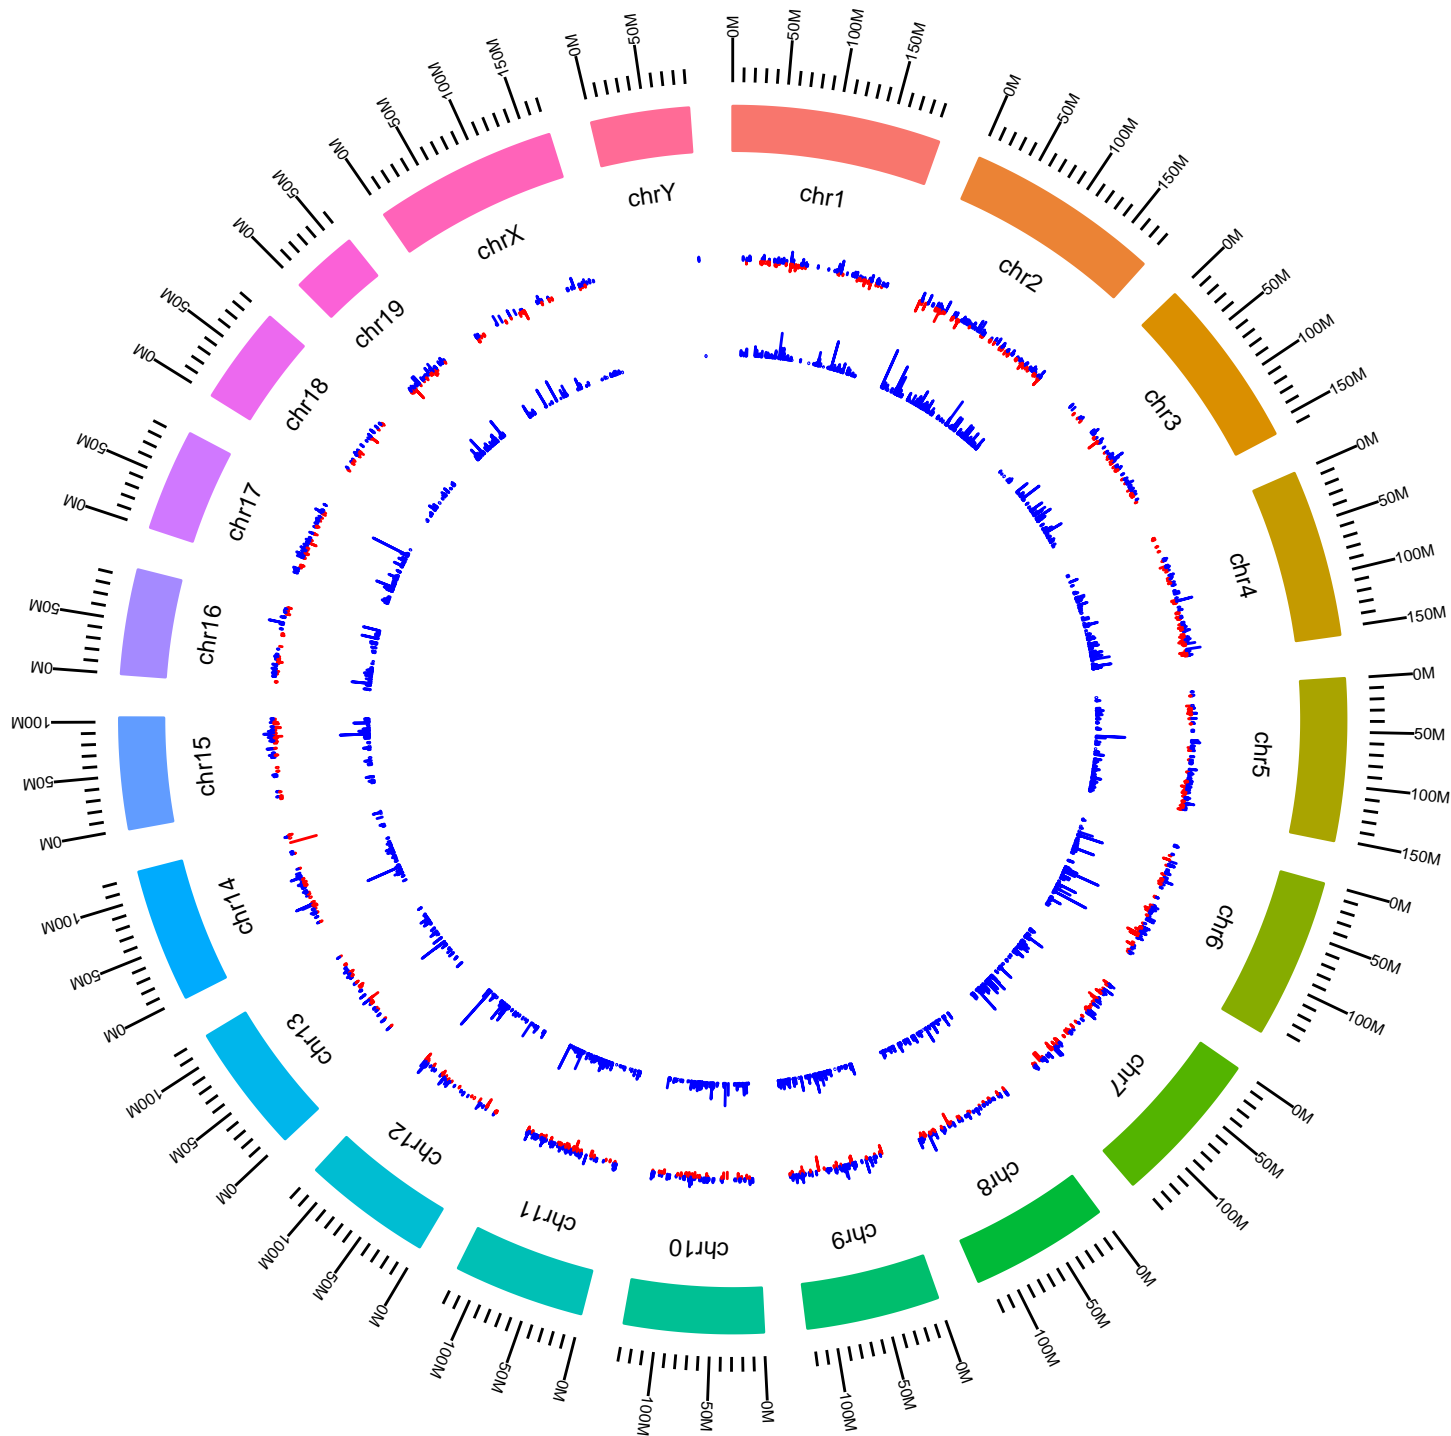

Supplement: Supplementary file 226 [file 18969356]

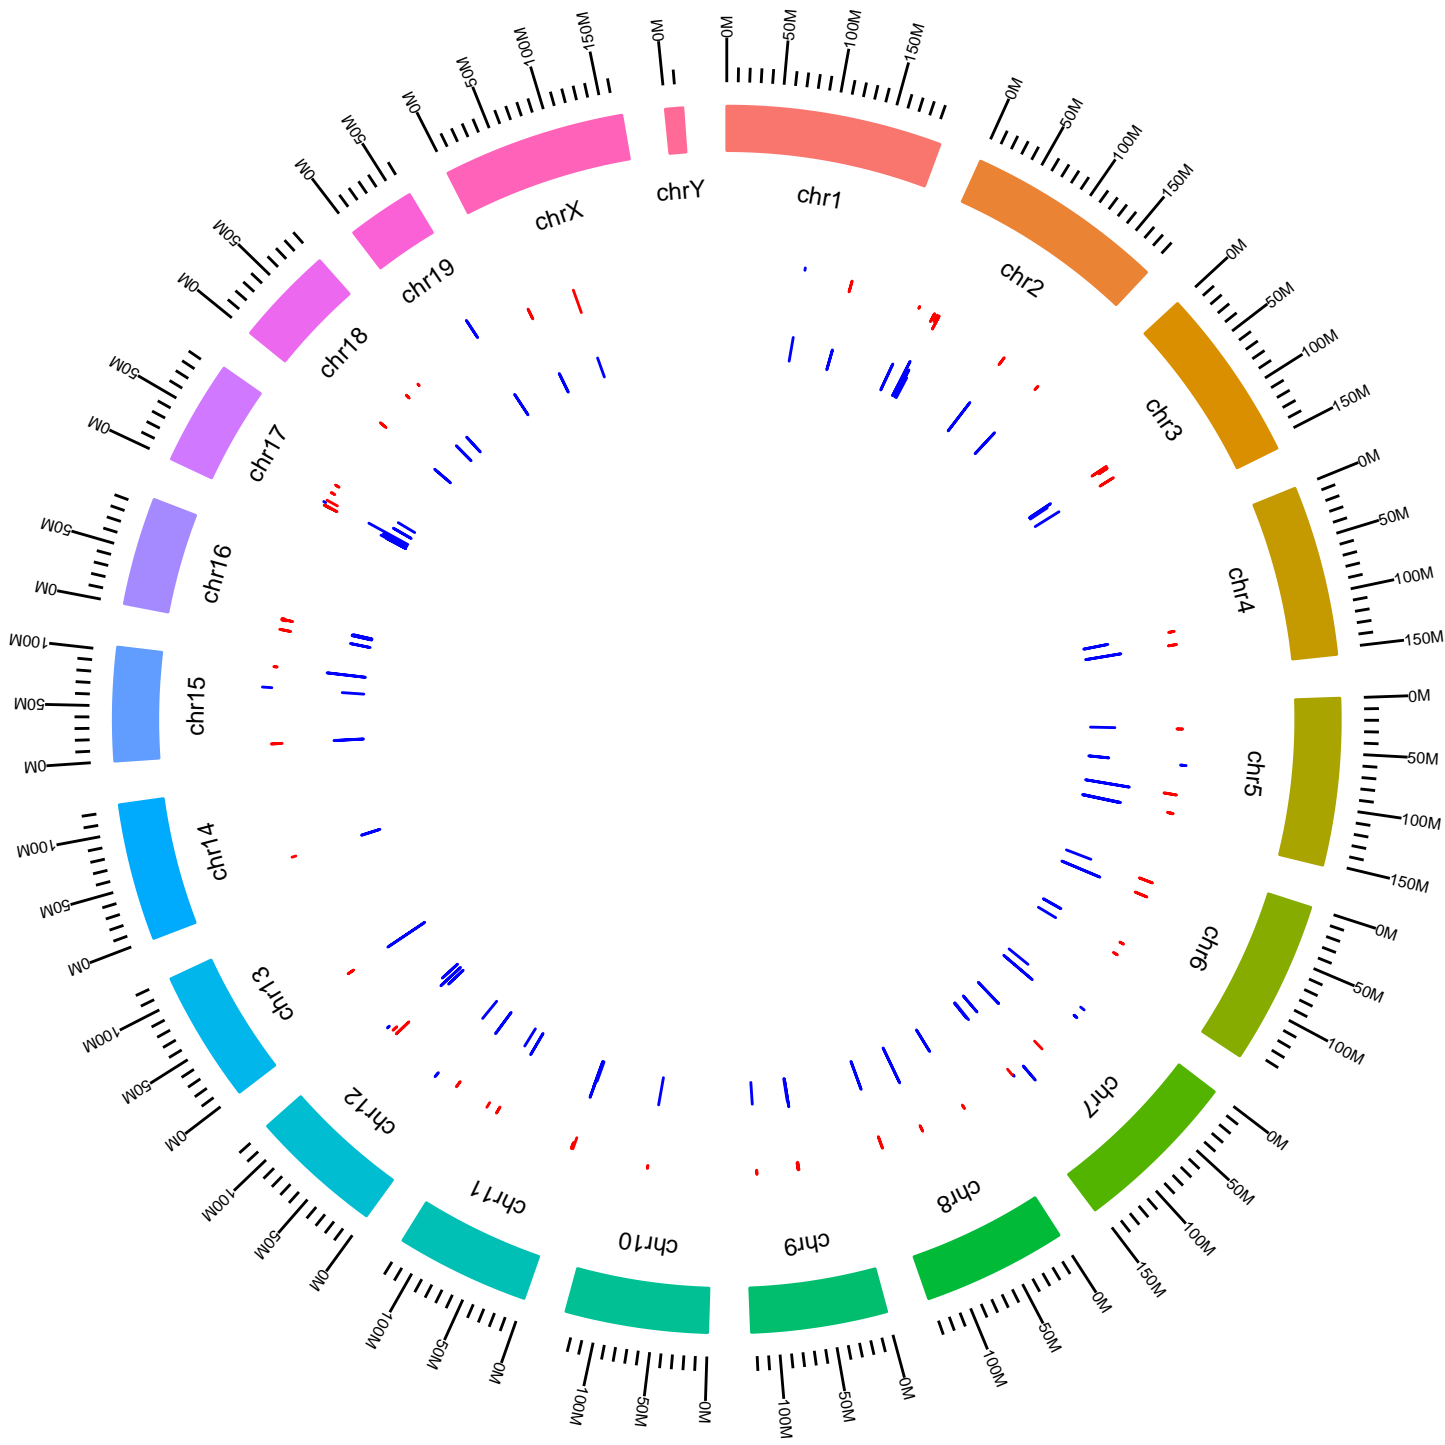

Supplement: Supplementary file 227 [file 18969356]

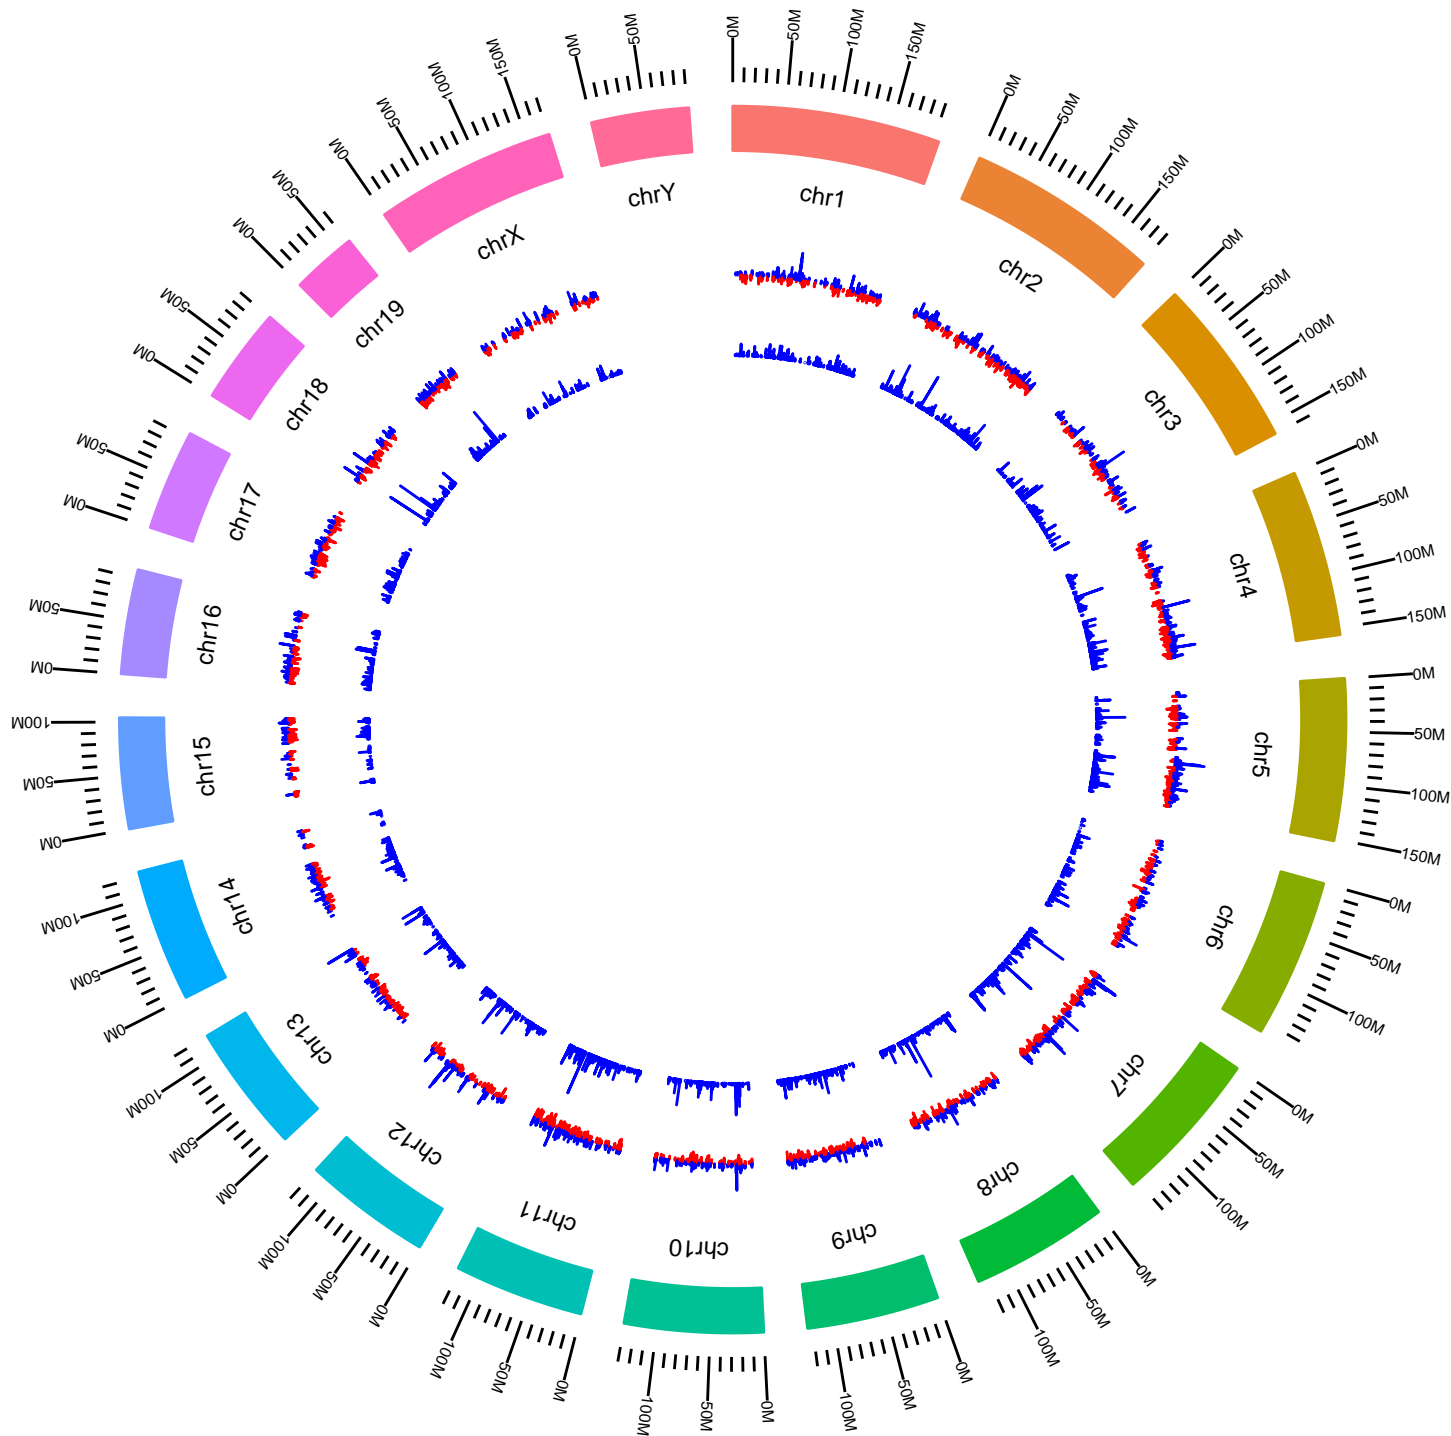

Supplement: Supplementary file 228 [file 18969356]

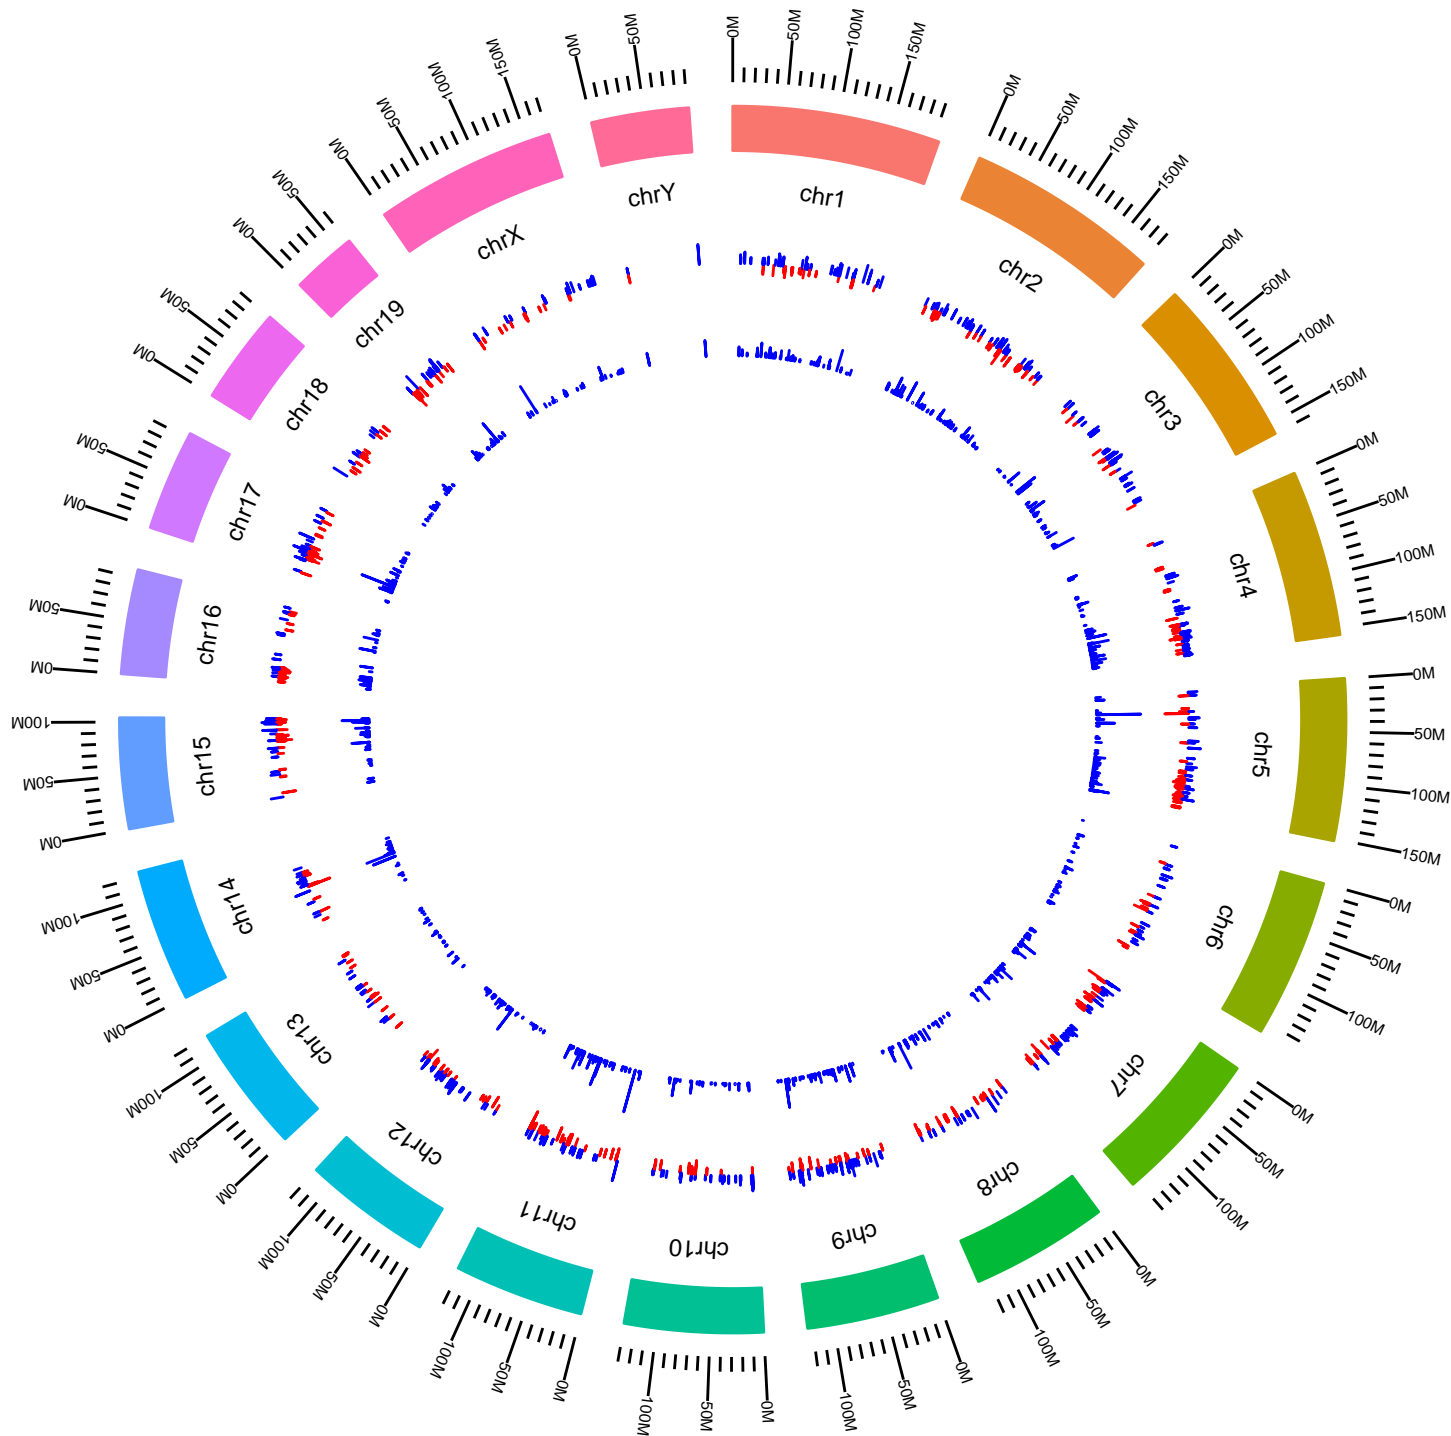

Supplement: Supplementary file 229 [file 18969356]

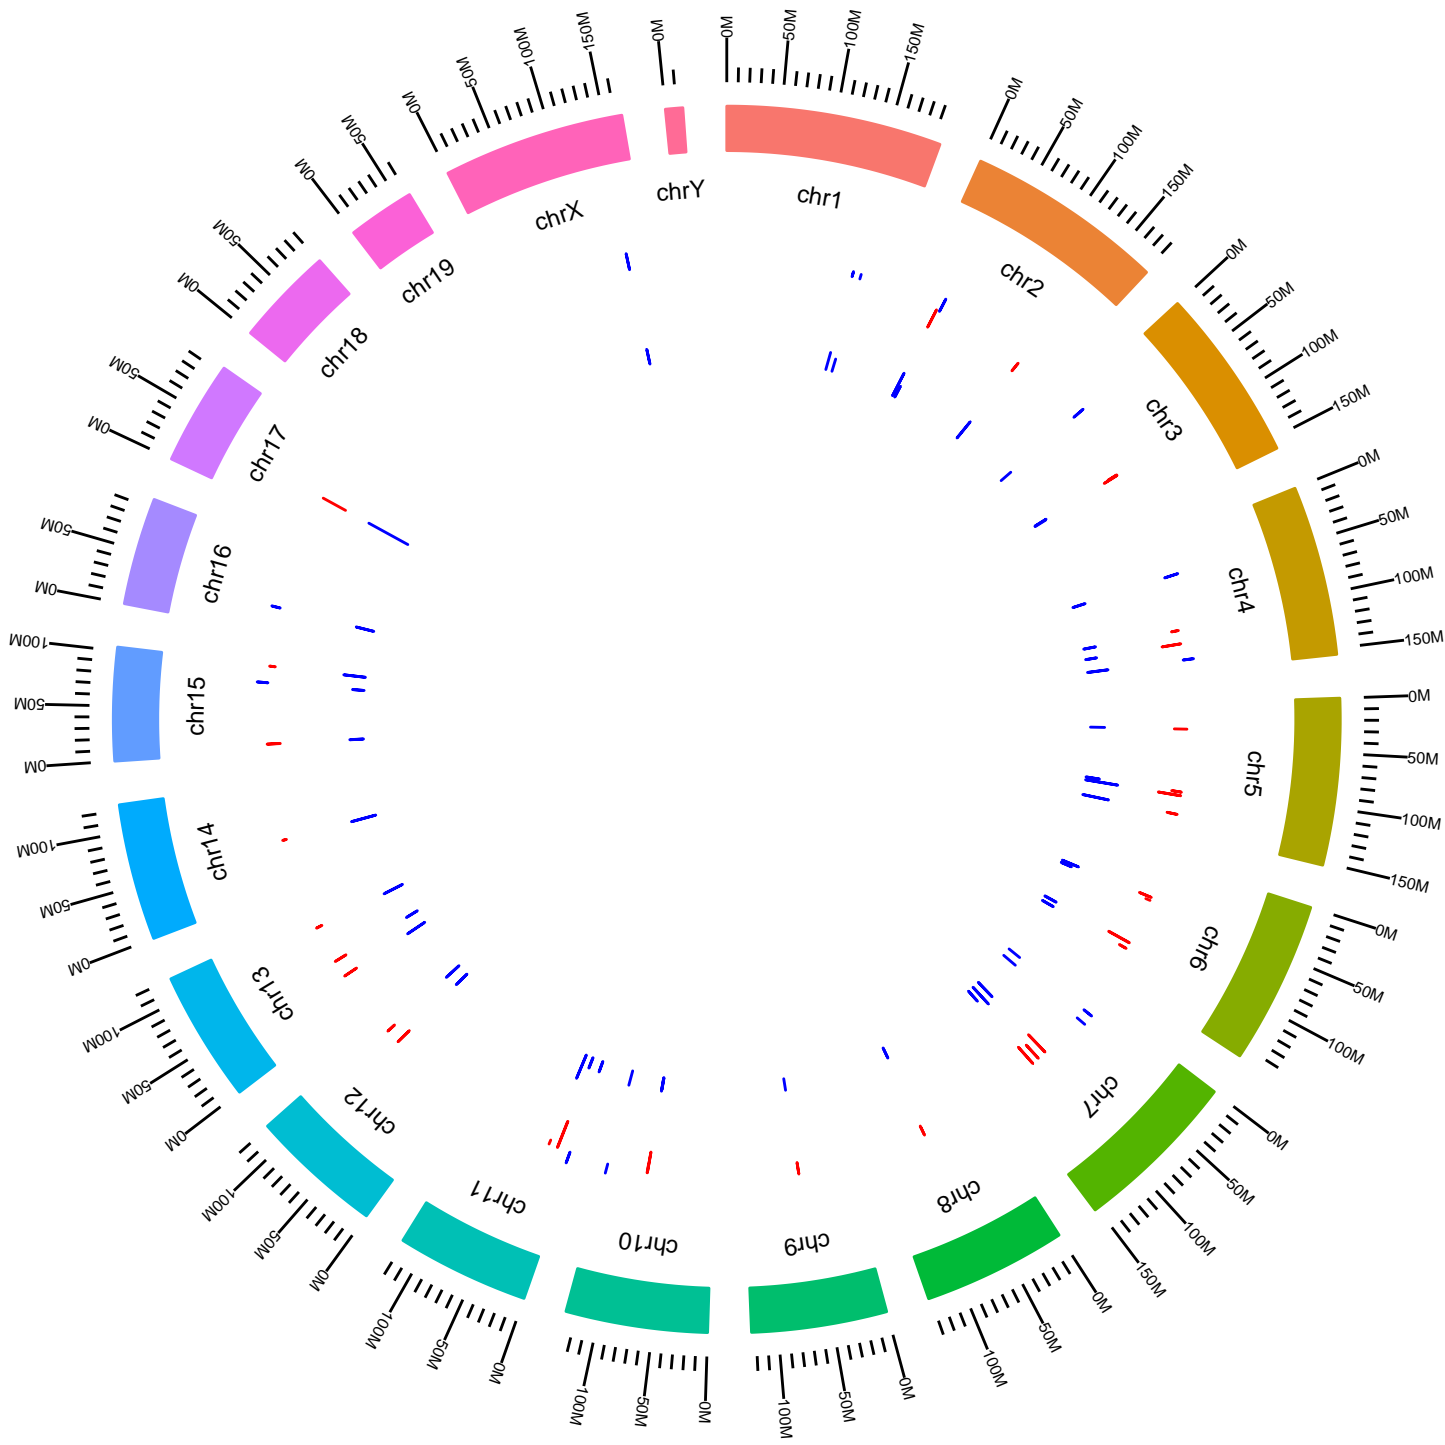

Supplement: Supplementary file 230 [file 18969356]

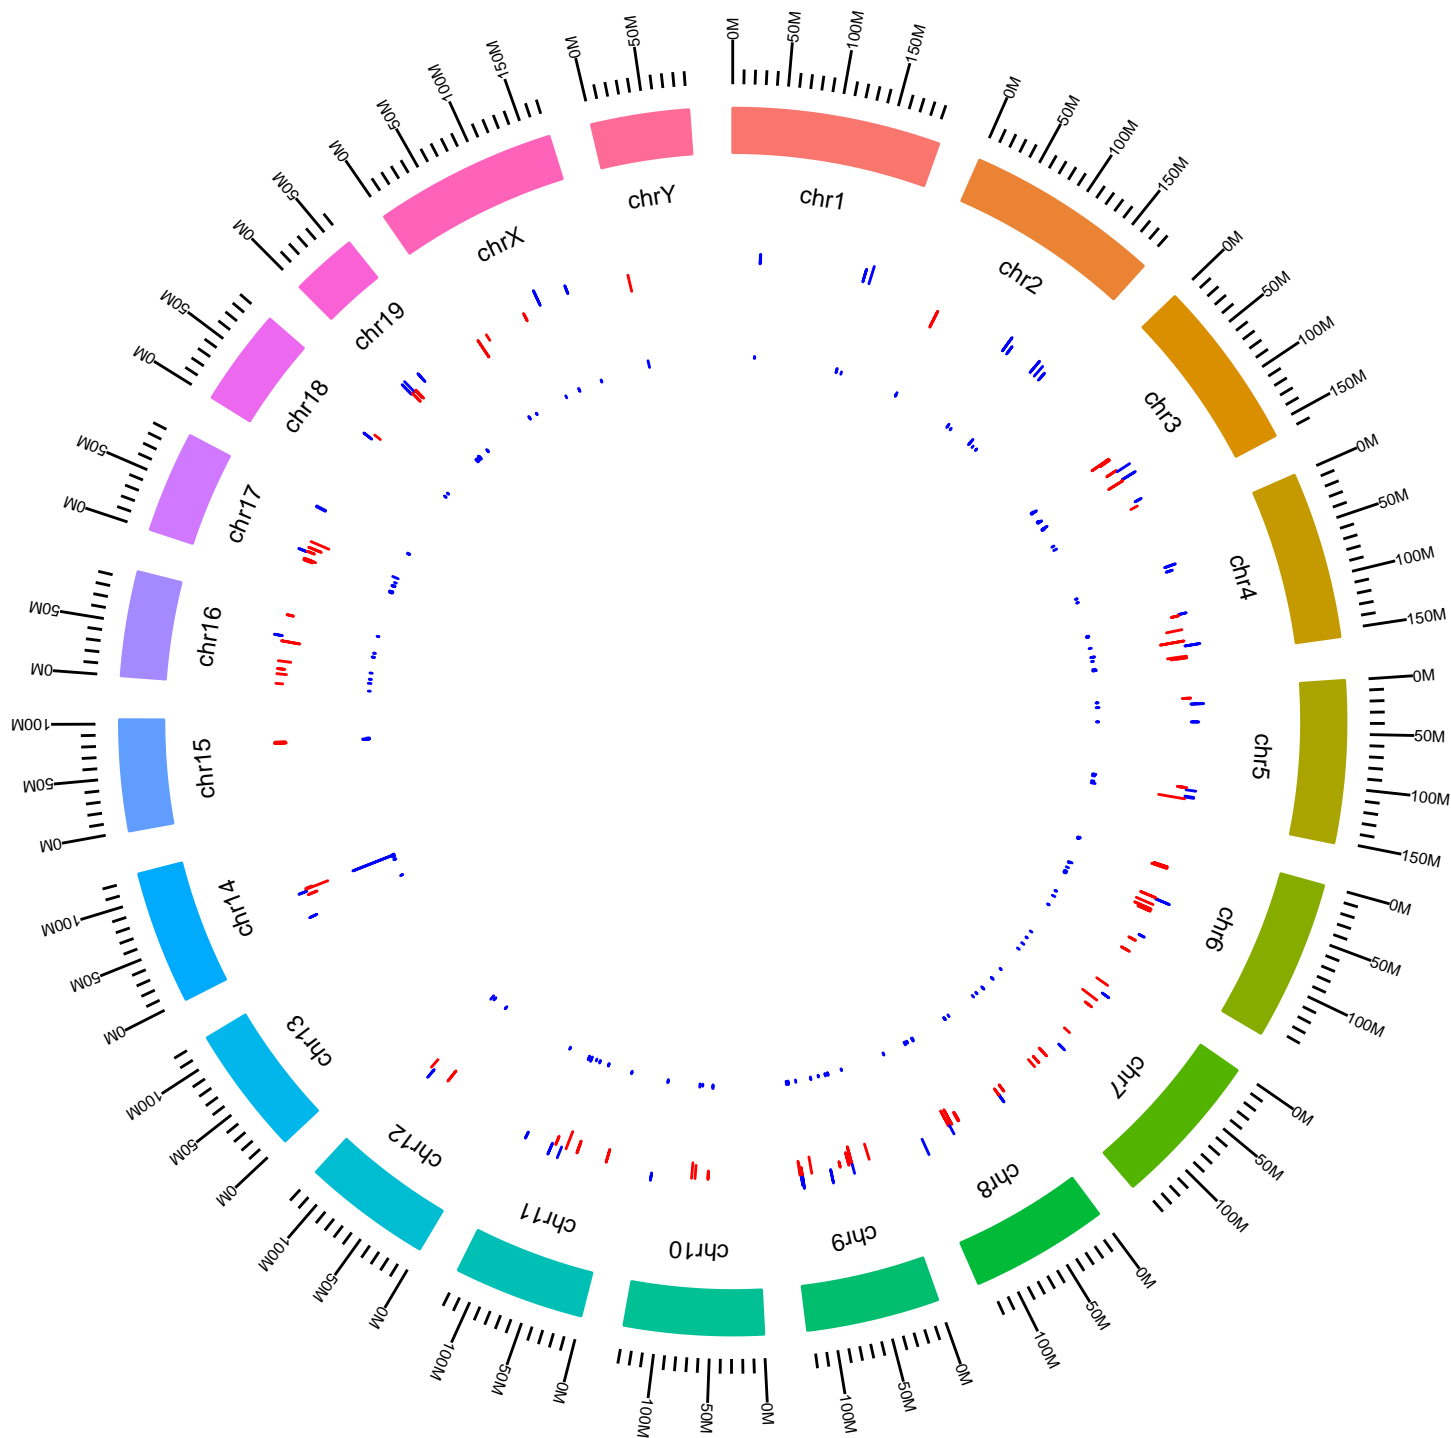

Supplement: Supplementary file 231 [file 18969356]

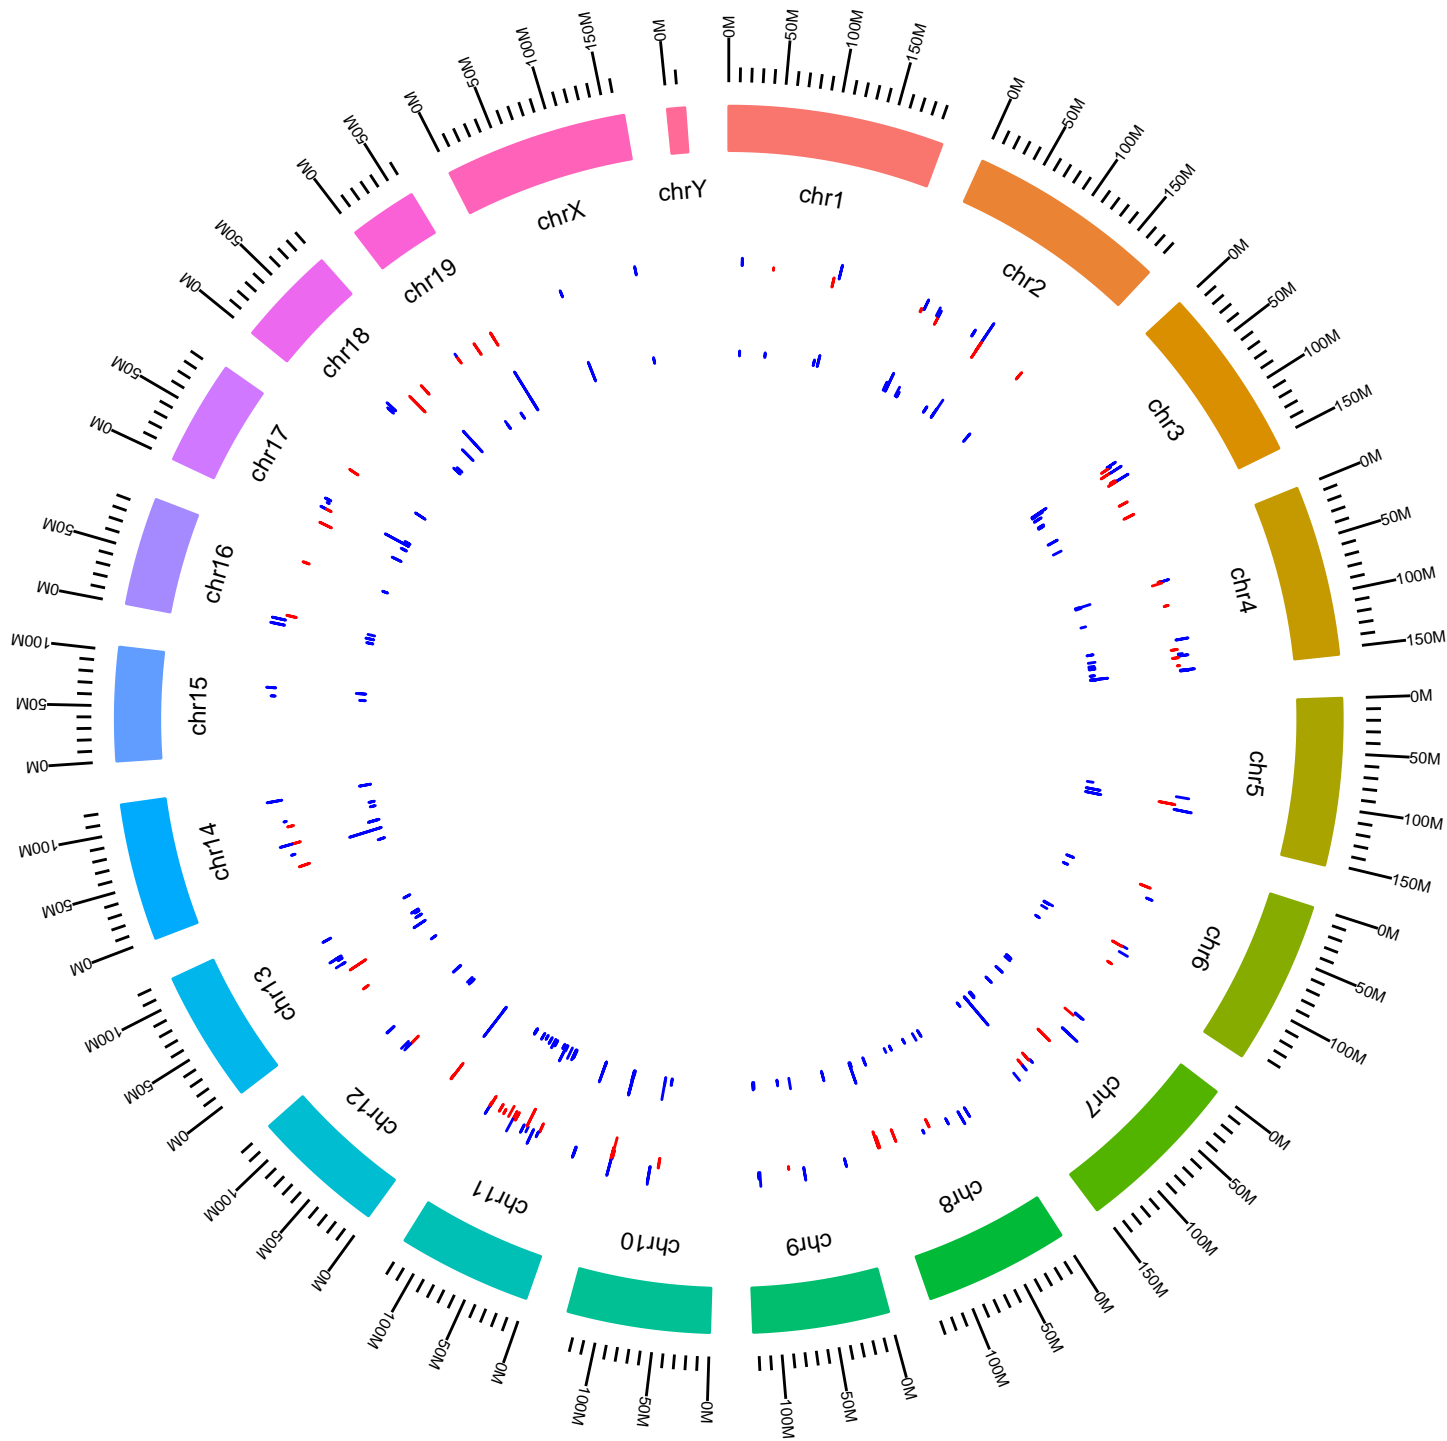

Supplement: Supplementary file 232 [file 18969356]

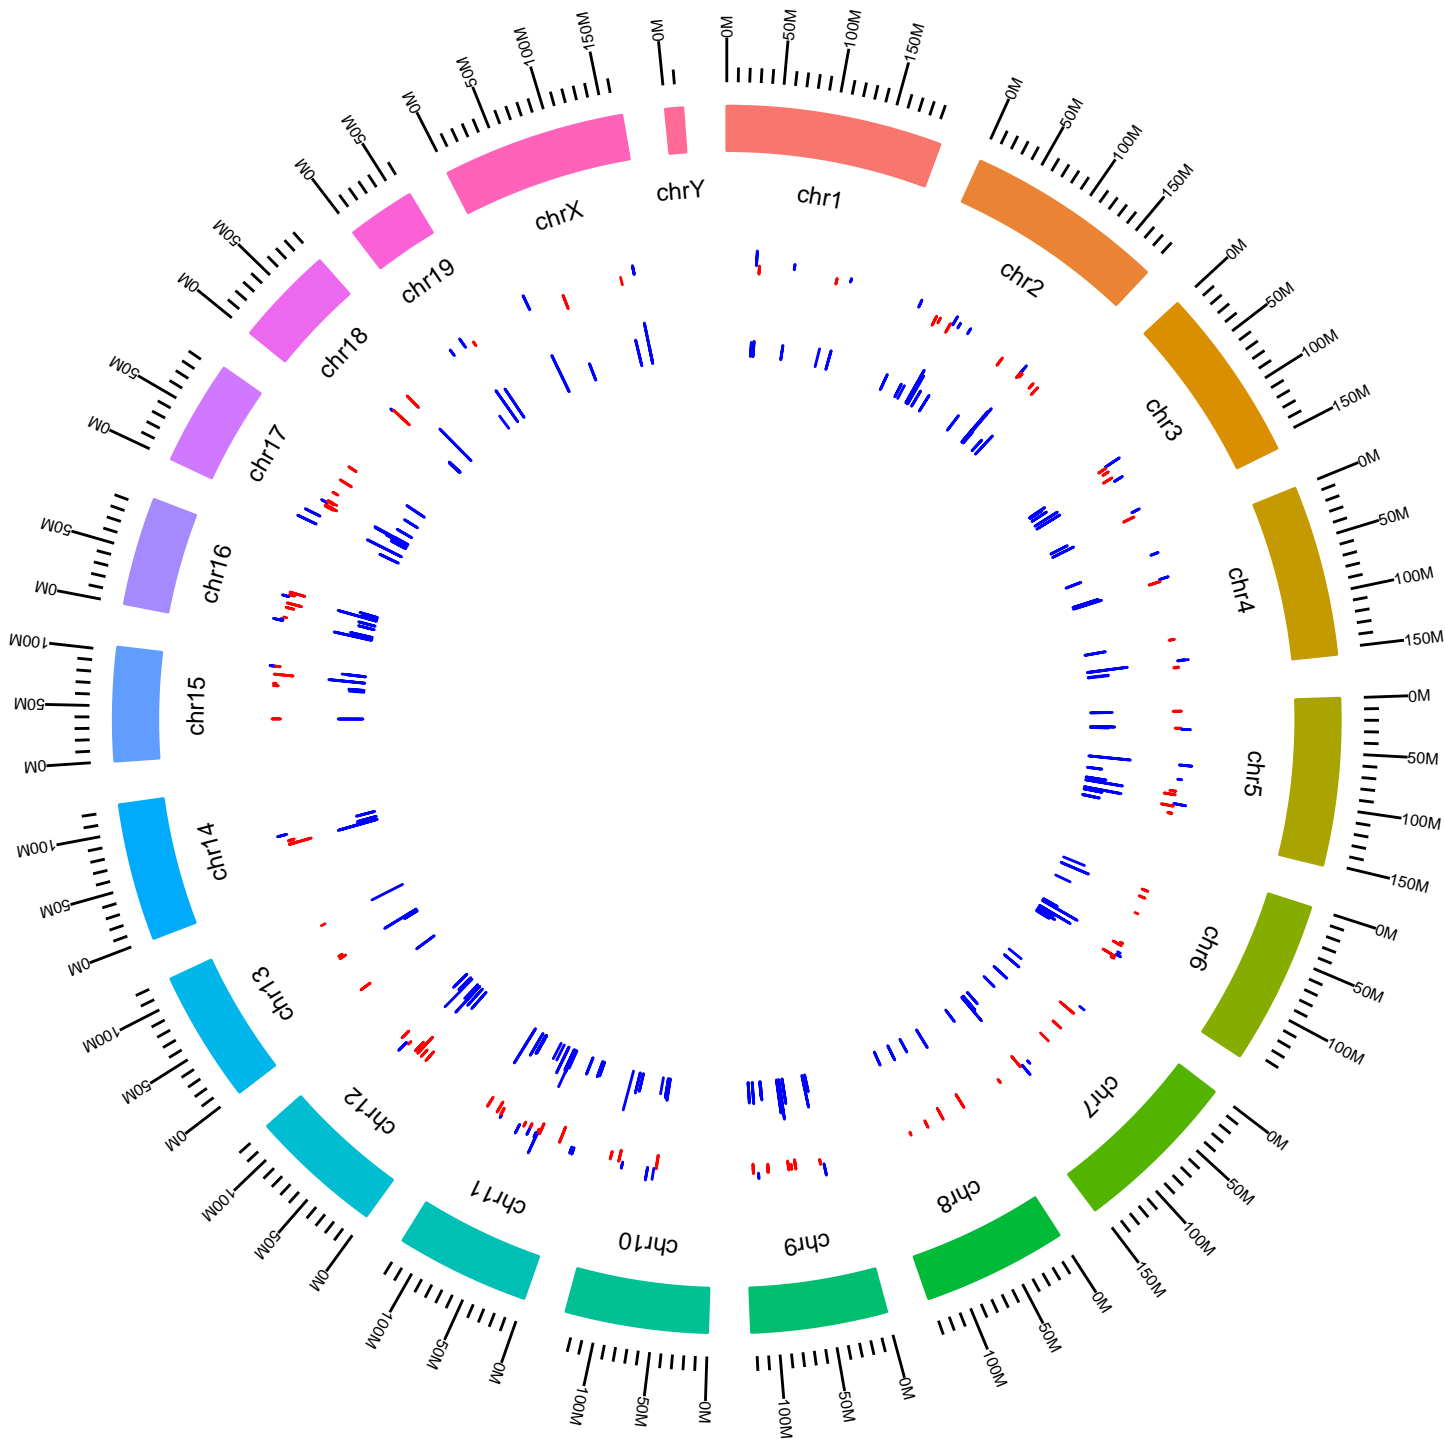

Supplement: Supplementary file 233 [file 18969356]

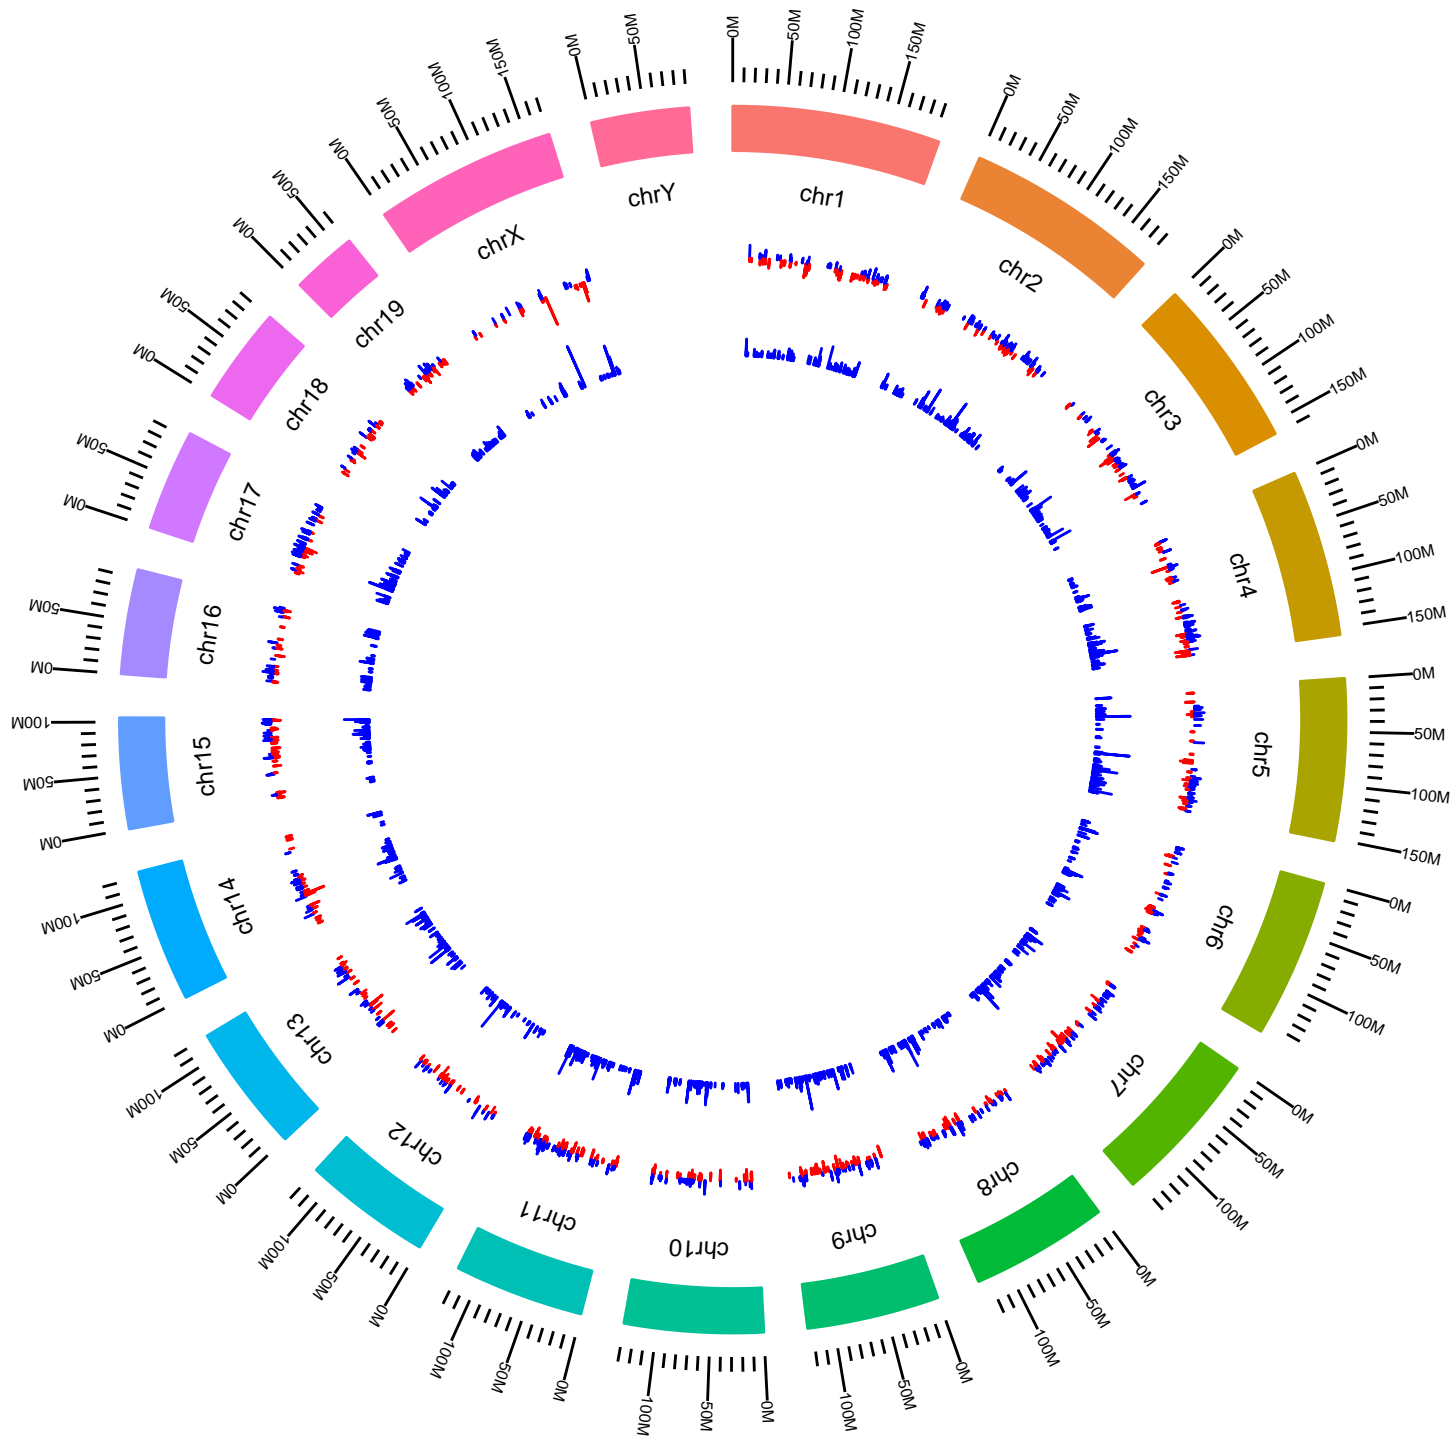

Supplement: Supplementary file 234 [file 18969356]

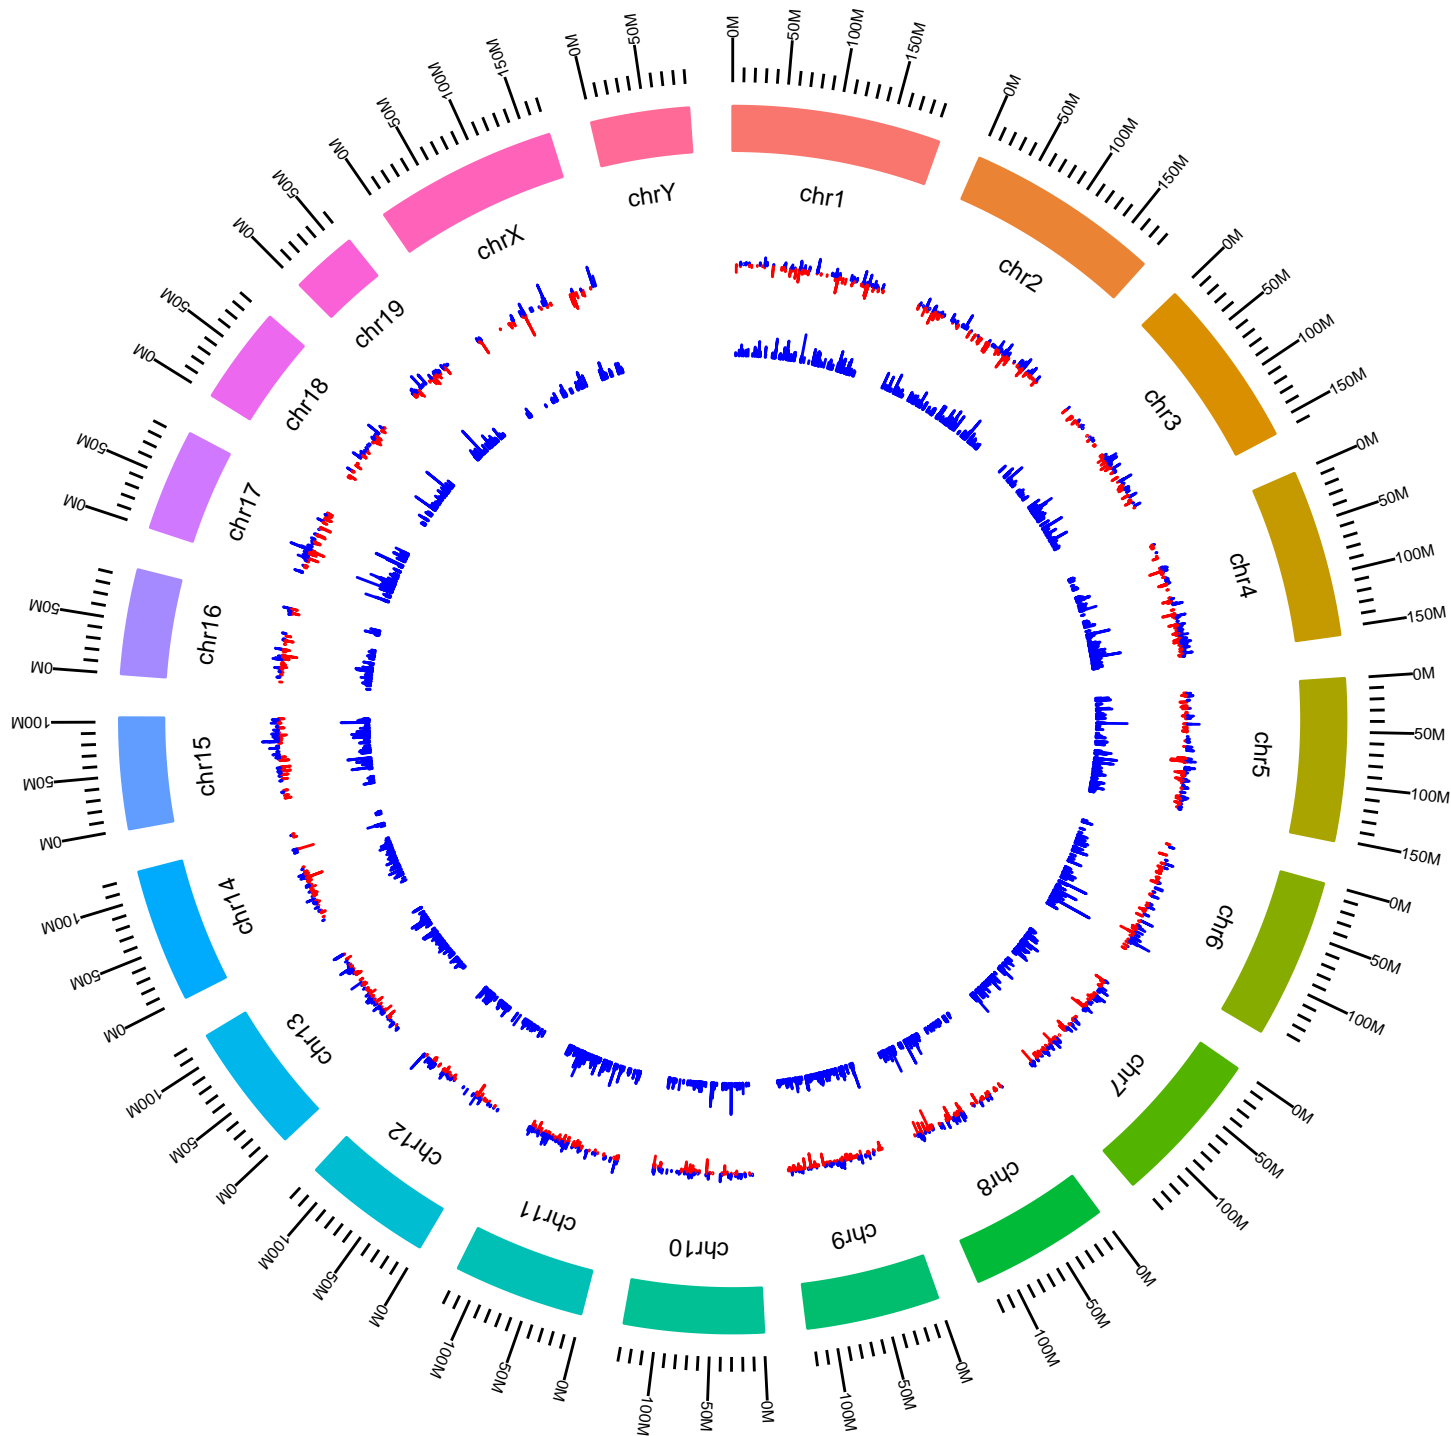

Supplement: Supplementary file 235 [file 18969356]

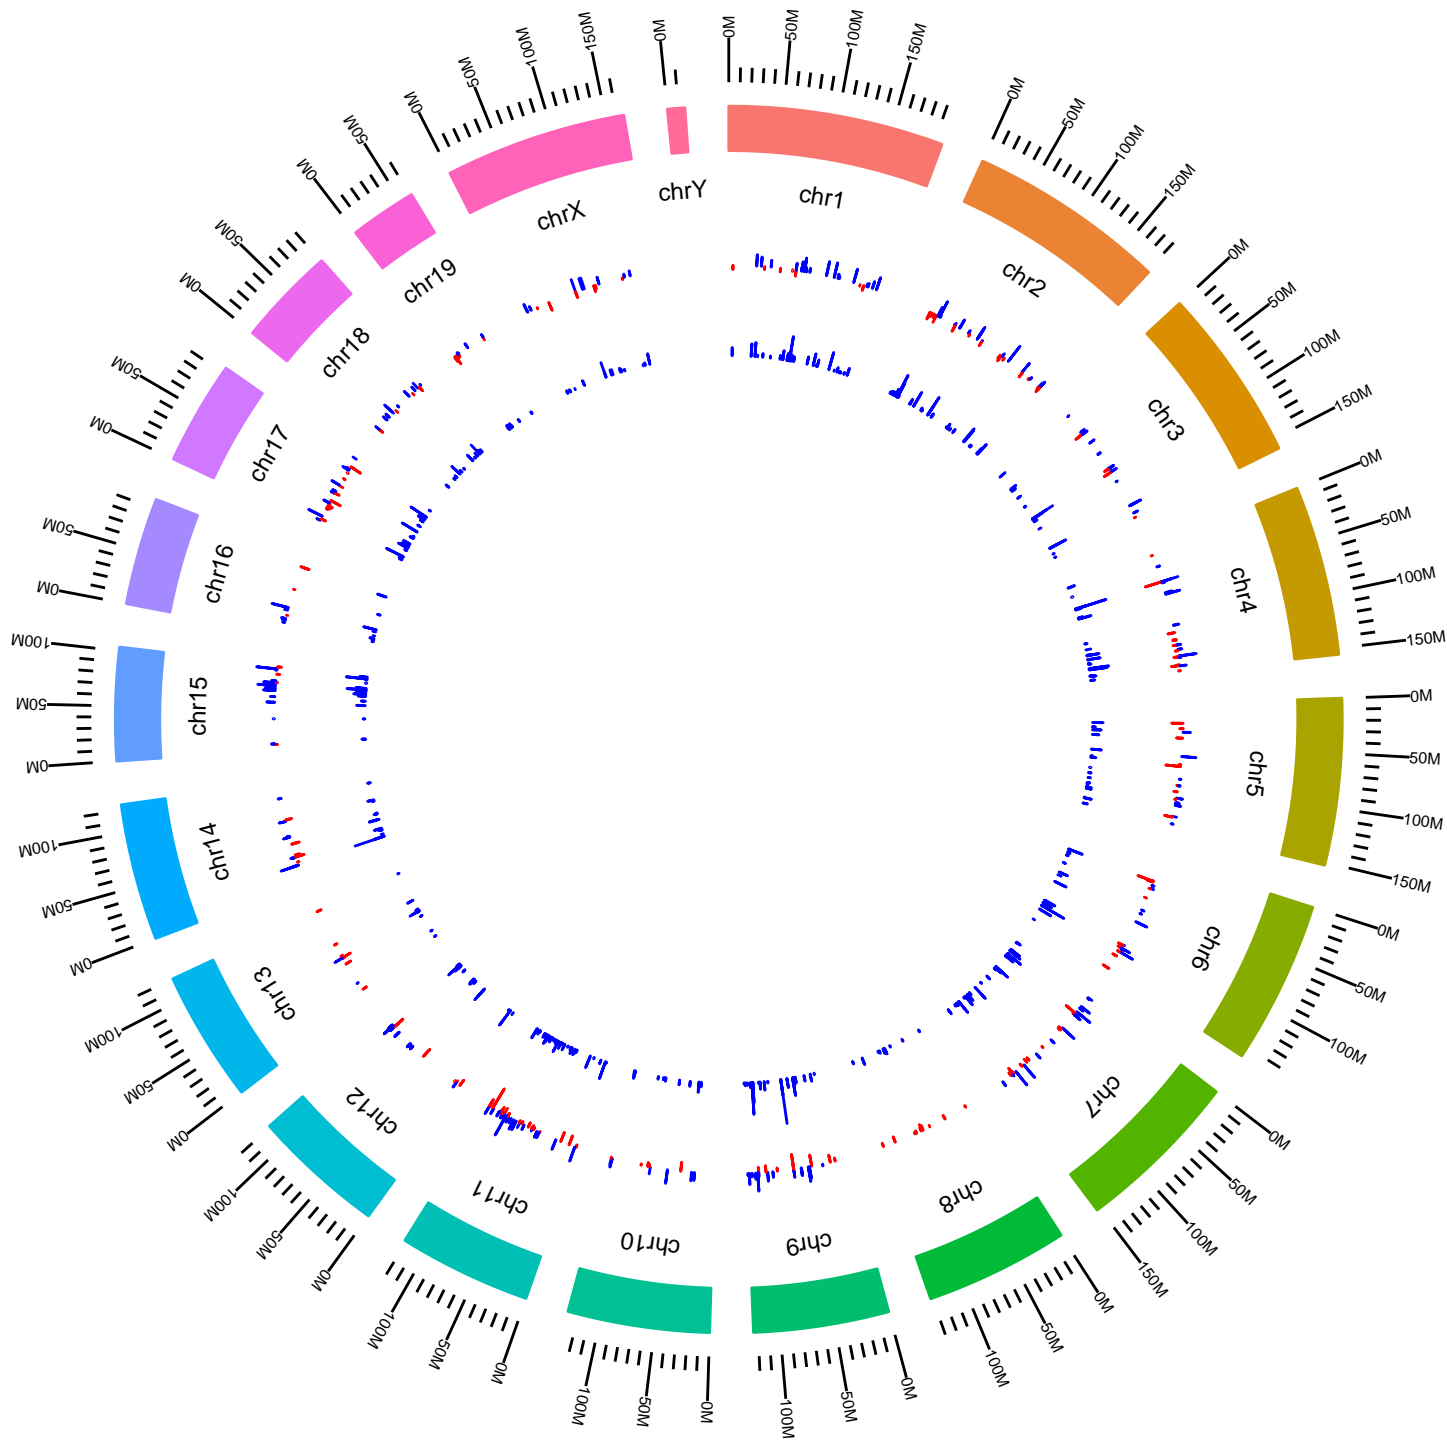

Supplement: Supplementary file 236 [file 18969356]

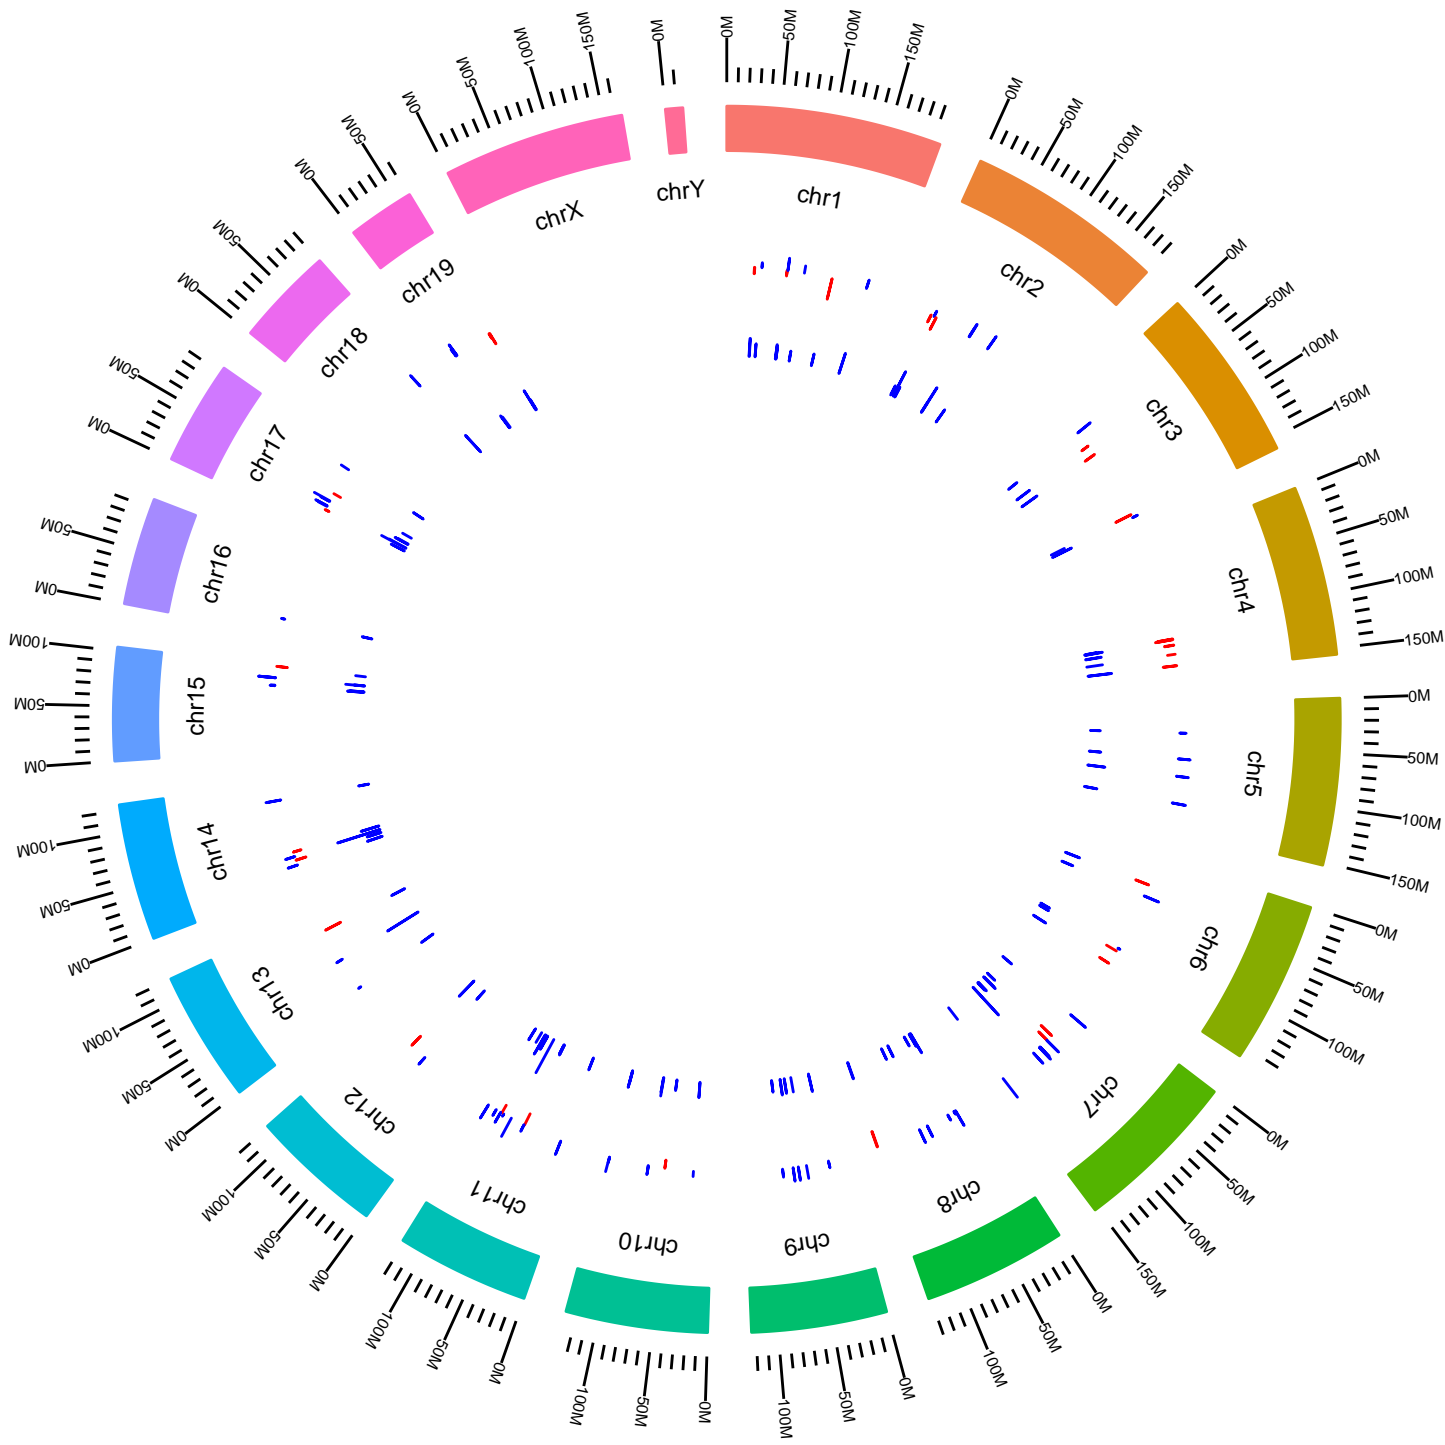

Supplement: Supplementary file 237 [file 18969356]

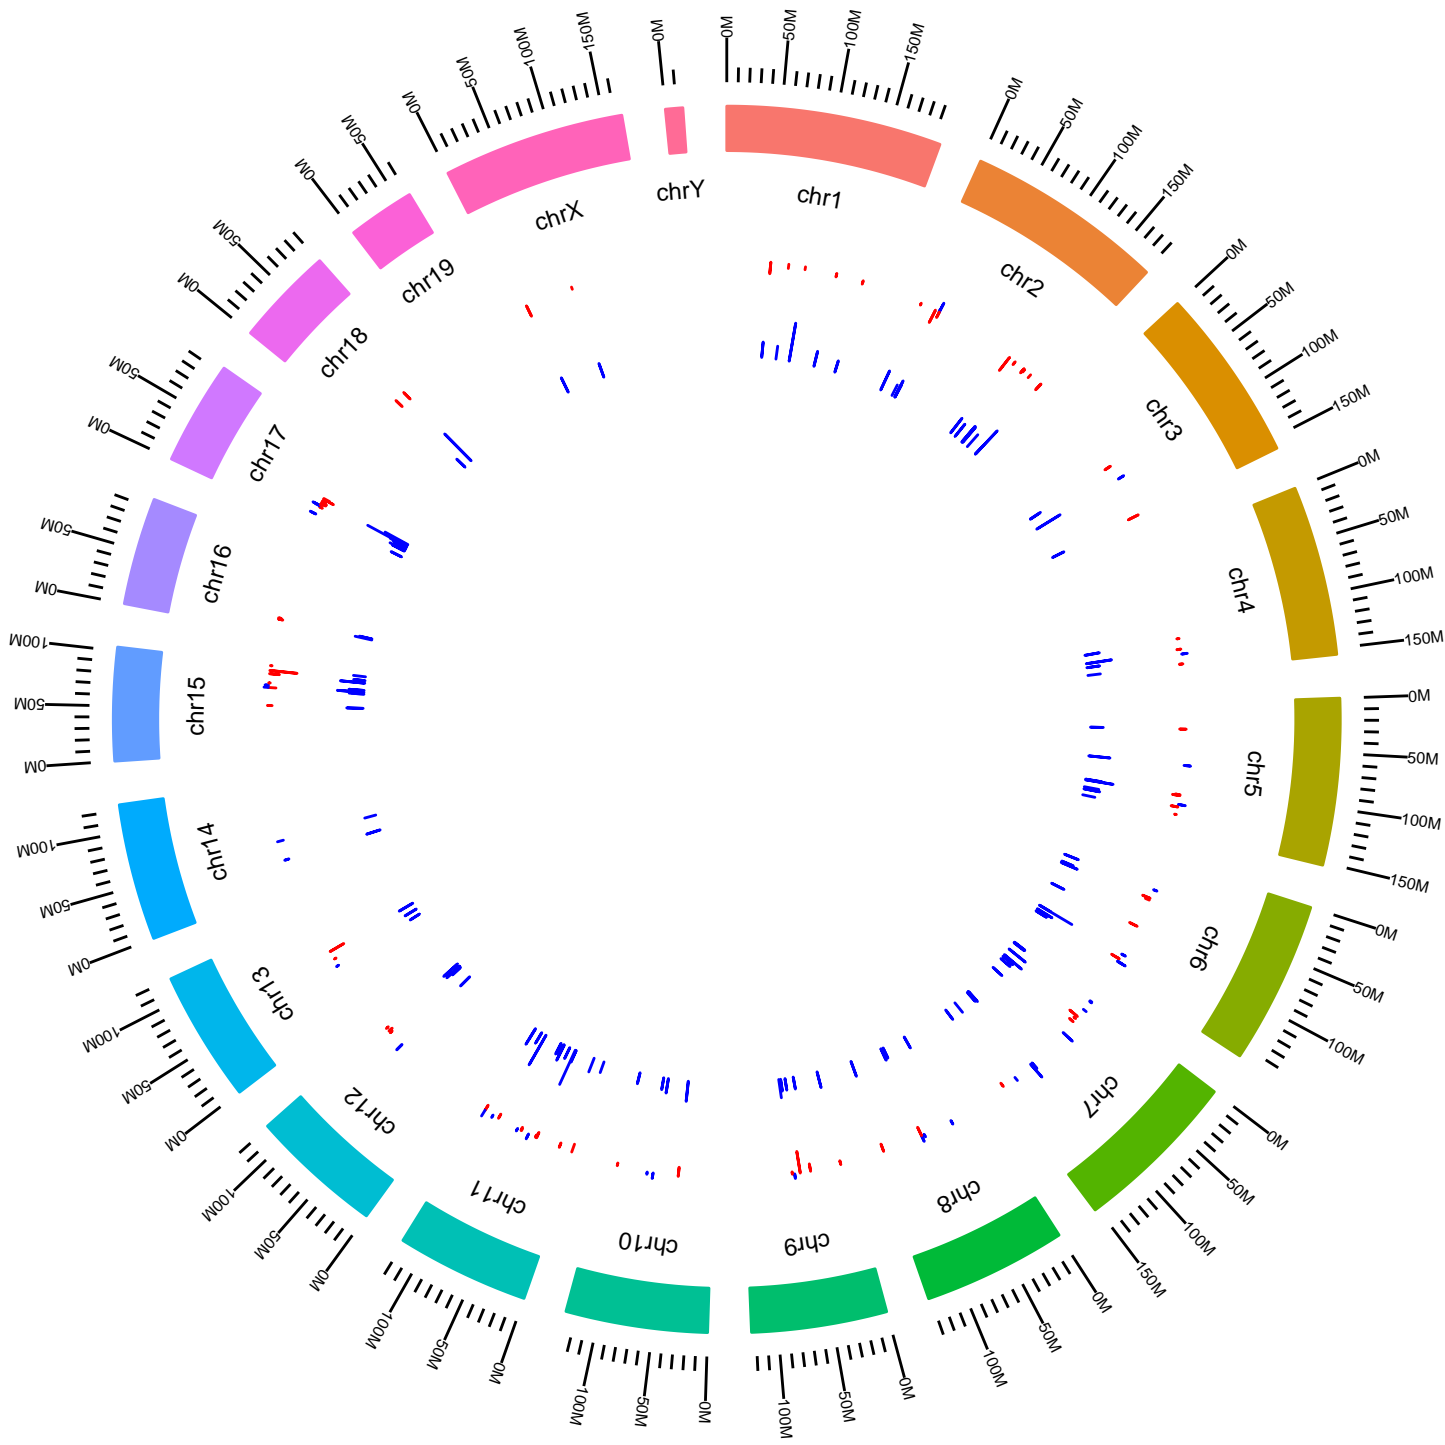

Supplement: Supplementary file 238 [file 18969356]

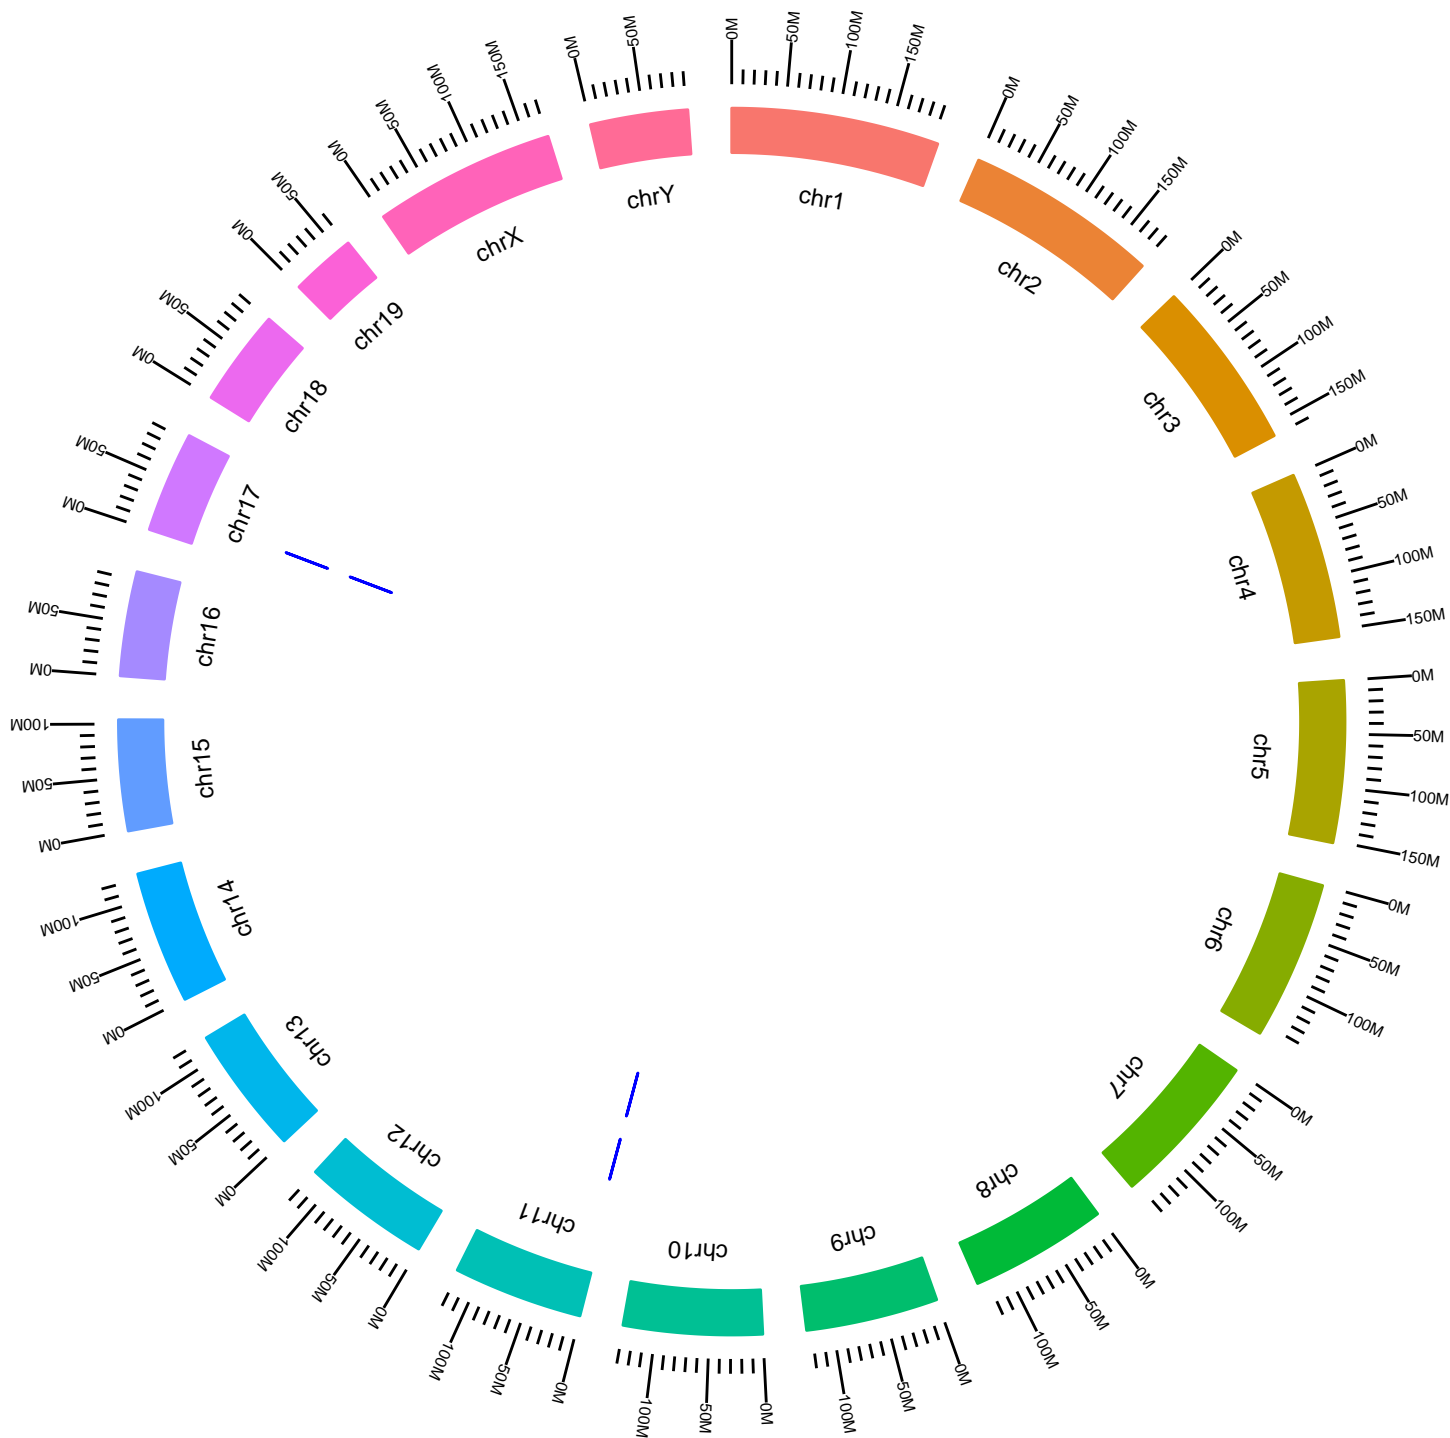

Supplement: Supplementary file 239 [file 18969356]

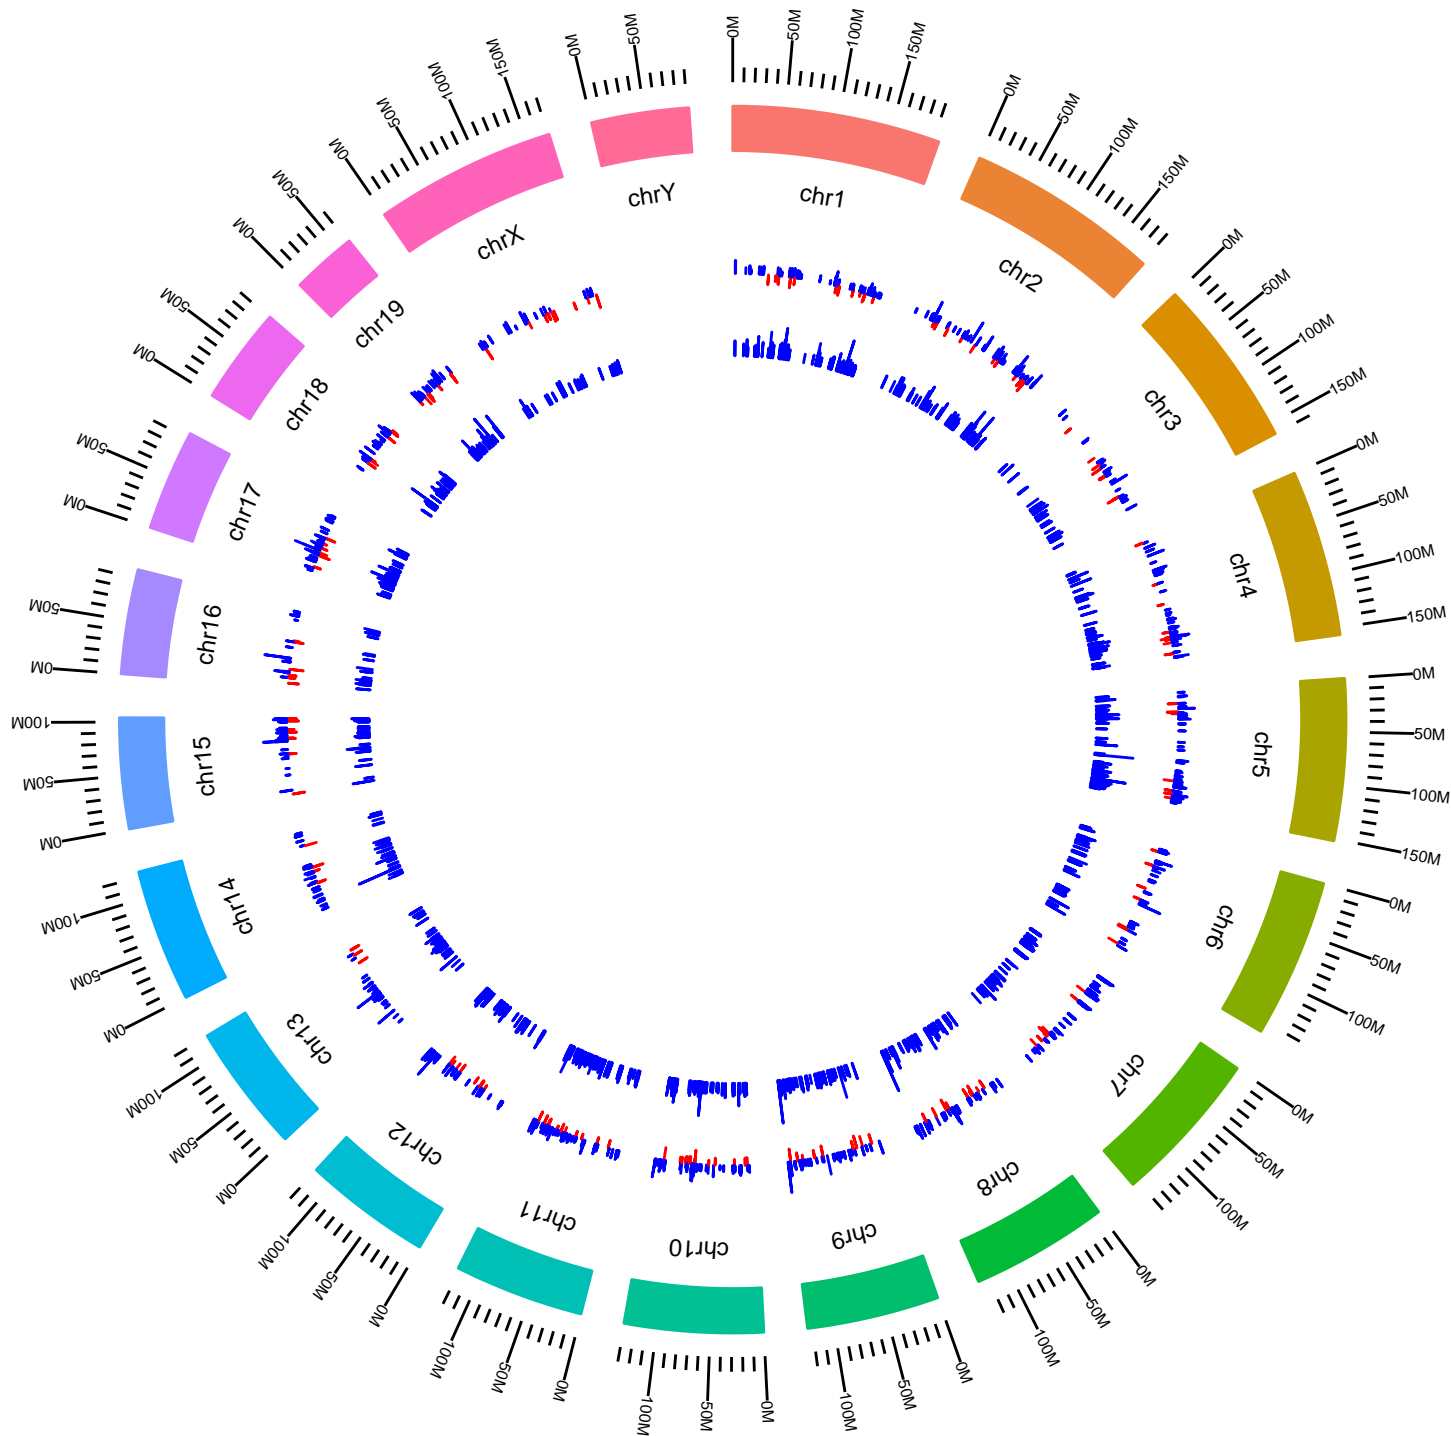

Supplement: Supplementary file 240 [file 18969356]

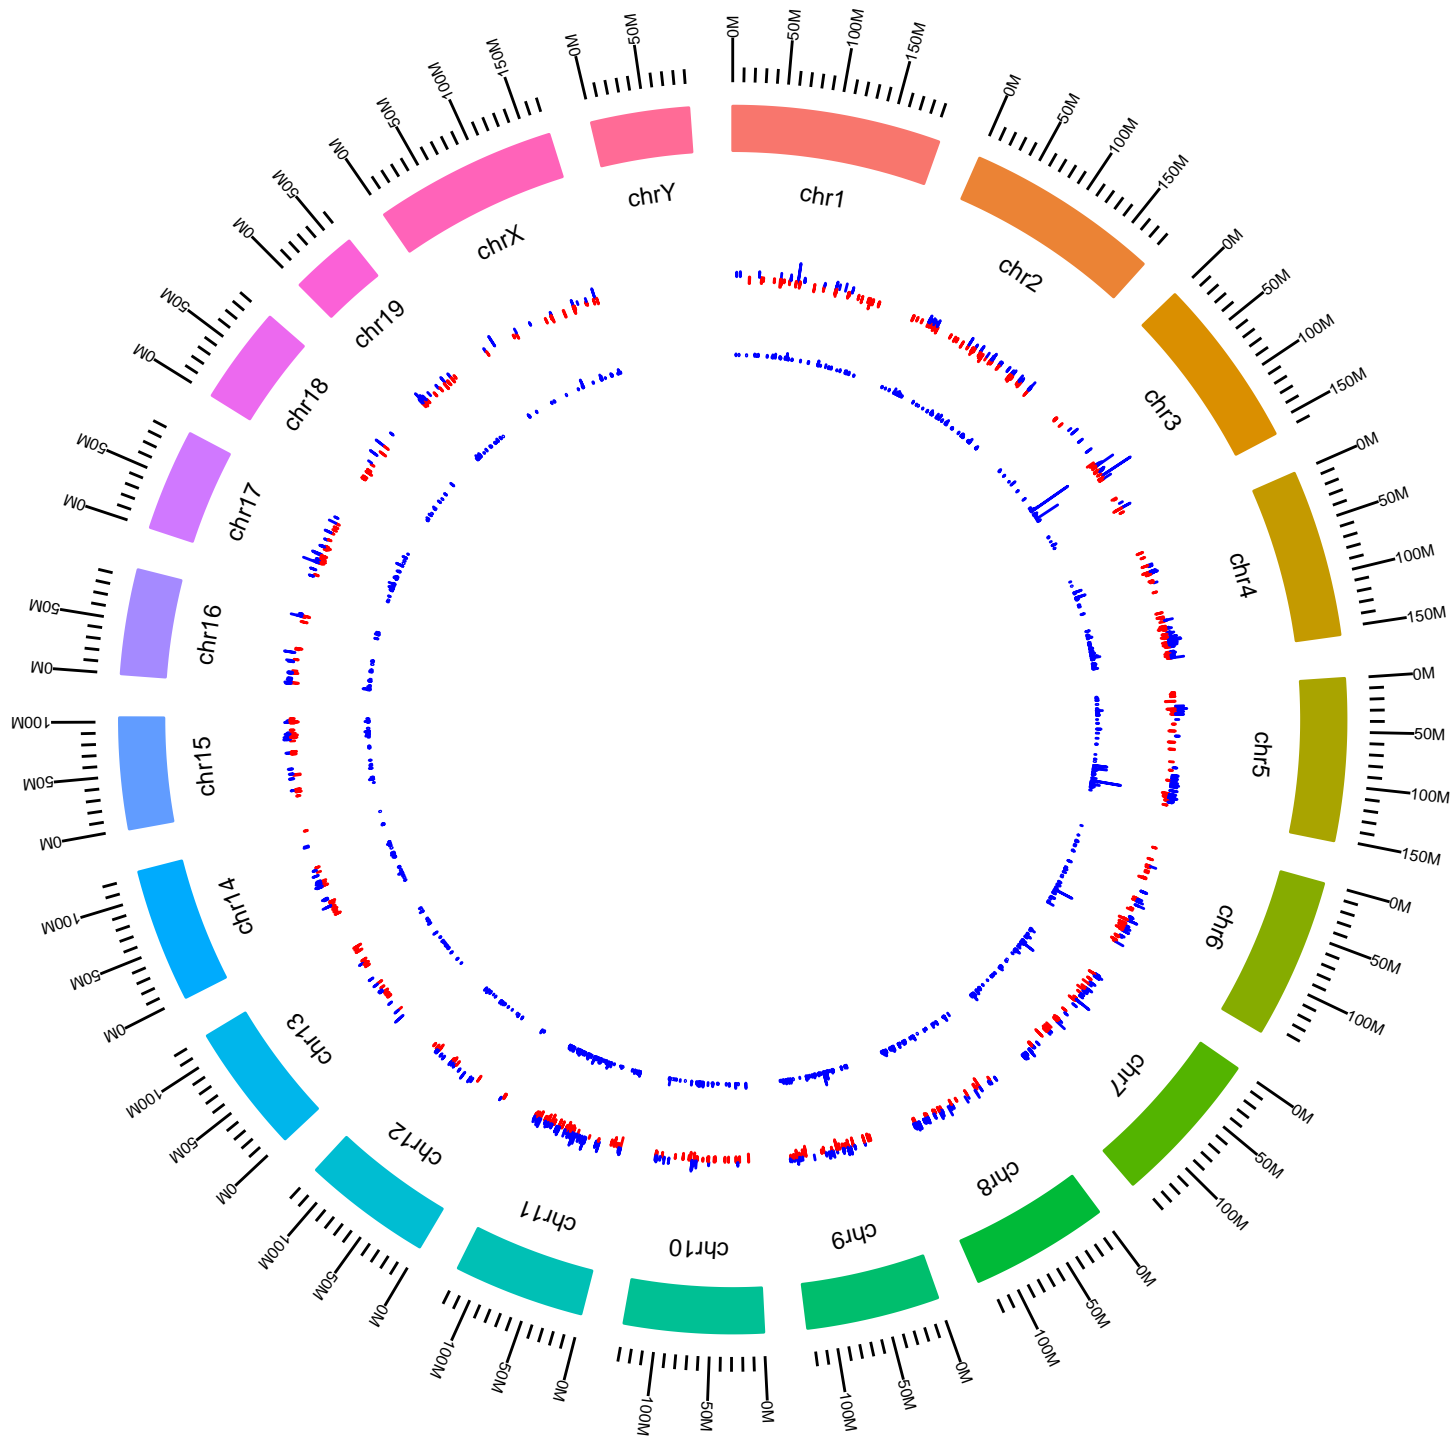

Supplement: Supplementary file 241 [file 18969356]

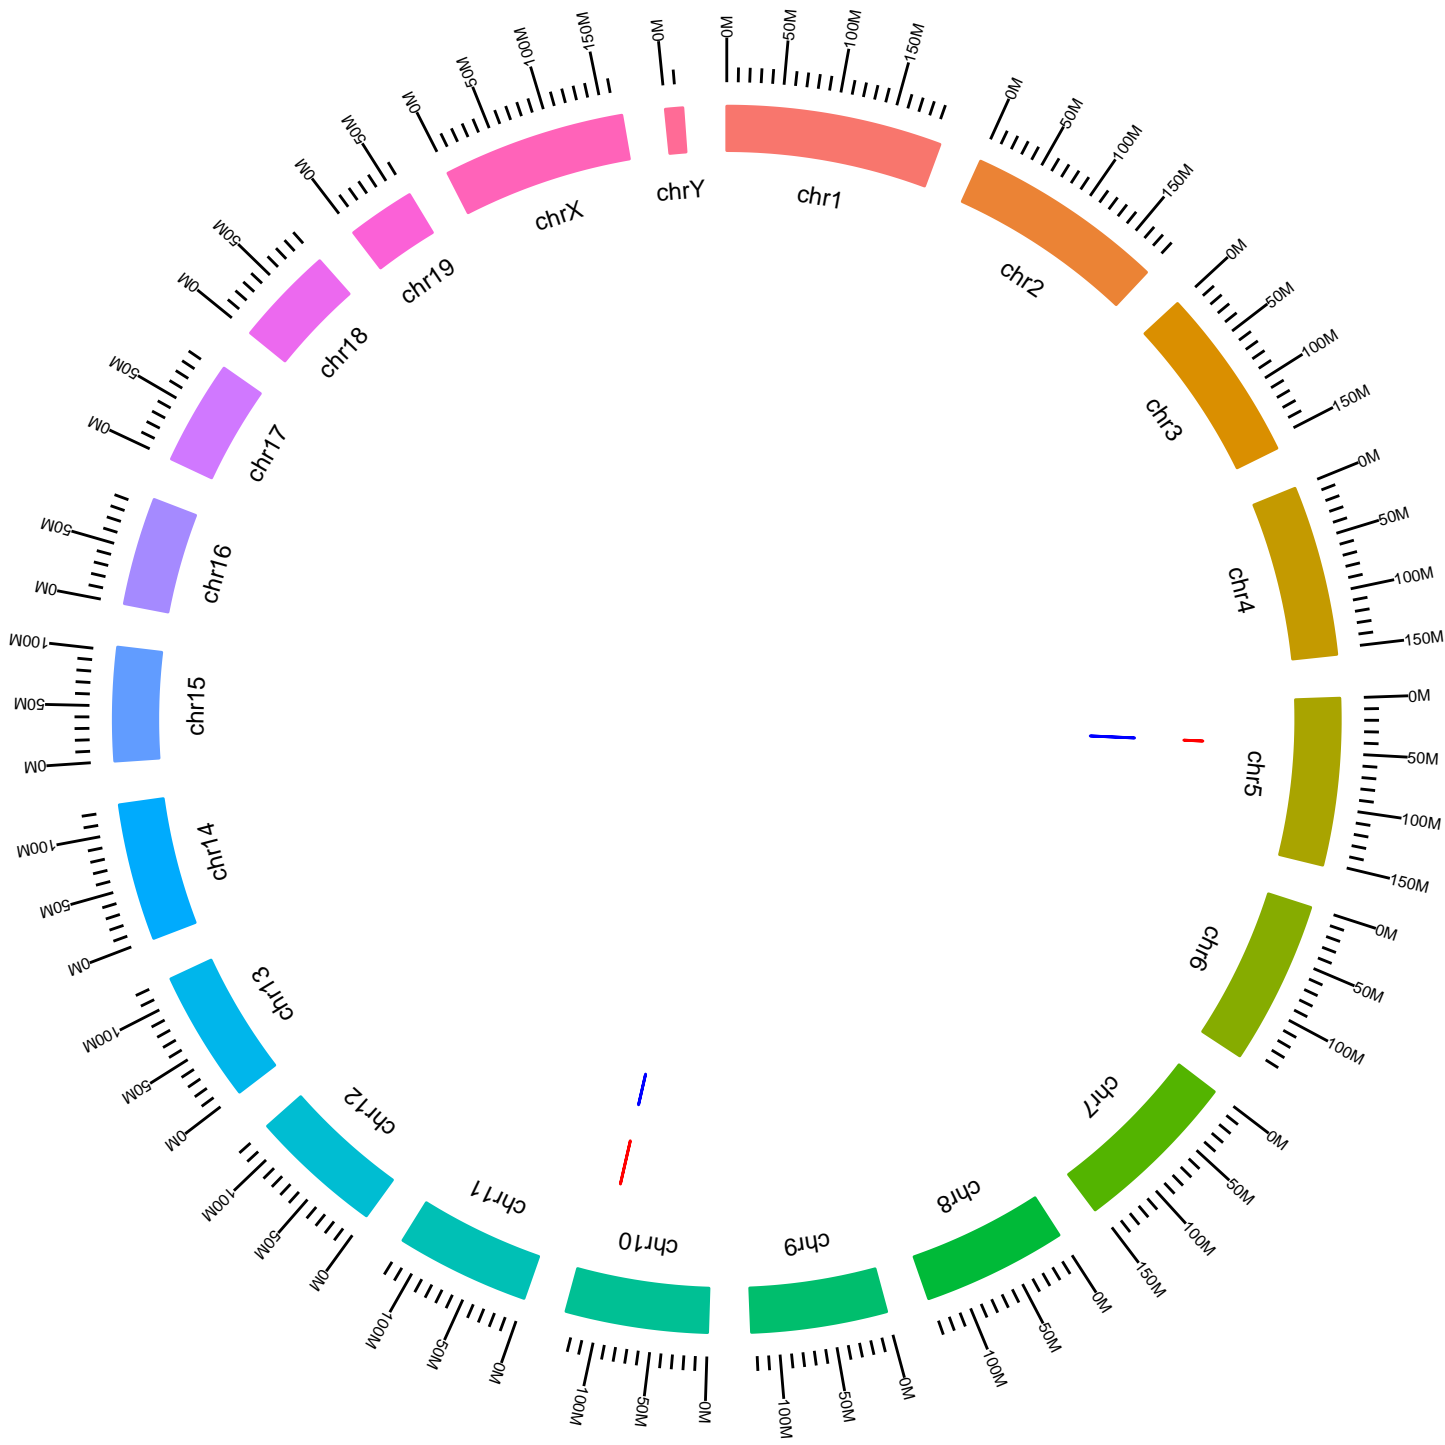

Supplement: Supplementary file 242 [file 18969356]
